# Supplementary material
Source: Research Square preprint supplement (doi:10.21203/rs.3.rs-9153240/v1)
Supplement: Supplementary file 1 [file dcc4ac6e455d3e9806f0d97f.xlsx]

## Sheet: Sheet1
Date	ZCAD	ZJPY	ZEUR	ZGBP	ZCHF	ZAUD	ZCNY	ZBTC	ZETH	ZXRP	ZUSDT	ZGold	ZSilver	ZPlatinum	ZPalladium	series
2017-04-19	1.49369	1.04031	-0.0133971	-0.272906	0.191664	1.08175	0.424553	0.116807	-0.939199	-1.06379	0.00140198	-0.0446284	-0.642867	-0.377983	-0.529421	1
2017-04-20	0.205364	0.424515	-1.02544	-0.563595	-0.534388	-0.837971	-0.324699	0.364759	0.725942	-0.186778	0.00427603	0.206833	-0.113645	-0.192473	0.777762	2
2017-04-21	0.395545	-0.443995	1.30316	0.657457	0.59761	0.00871984	0.2293	0.155245	-0.224151	1.46224	-0.0184034	-0.0744512	-0.682538	0.181978	0.457363	3
2017-04-24	0.25667	1.03368	-3.0592	0.00523294	-0.470188	-0.40279	-0.034518	-0.0752302	0.660589	-0.861763	-0.0314052	-1.11859	-0.561953	-1.51939	-0.416778	4
2017-04-25	1.66748	1.78932	-1.88767	-0.730081	-0.814443	0.399634	-0.0925556	0.234628	0.0795286	0.276091	-0.0165249	-0.190842	0.0765328	-0.0691599	-0.00555417	5
2017-04-26	-0.397607	0.985036	1.3813	-0.0224553	0.706634	1.56189	0.4875	0.338418	0.995249	0.180317	0.0240218	-0.566686	-0.825309	-0.325817	0.200572	6
2017-04-27	1.24853	-0.641155	0.16681	-0.699363	-0.171681	0.196388	0.202564	0.735703	2.83342	0.941678	-0.000187751	0.0289899	-0.443086	-0.327511	0.556017	7
2017-04-28	0.0827829	0.463426	-0.612125	-0.669111	-0.0647218	-0.490477	-0.313708	-0.10542	1.83116	3.22402	0.0292738	0.261904	-0.183294	0.123862	0.698243	8
2017-05-02	1.24141	0.948626	-0.291999	0.238899	-0.644151	-1.00597	0.250023	1.81398	1.24265	2.34996	-0.0171113	-1.00545	-1.54837	-1.44071	-0.255528	9
2017-05-03	-0.632402	0.412474	-0.19214	0.0740168	0.020946	1.48165	0.0919129	0.551902	0.722369	1.65314	0.00932525	-0.50188	-0.357397	-0.869627	-0.918272	10
2017-05-04	0.678046	0.536104	-0.926131	0.0878087	-0.473858	0.991846	-0.0555346	0.411778	2.40111	3.55724	0.0349429	-1.97773	-1.21799	-0.950022	-0.262729	11
2017-05-05	-0.785666	-0.13497	-0.56681	-0.544549	-0.280803	-0.242473	0.318206	-0.182619	-1.38682	1.74043	0.0280939	-0.0887138	-0.82102	0.805451	0.659779	12
2017-05-08	0.218877	0.301334	1.35453	0.115053	2.23102	0.575762	0.0918085	2.1479	-0.50267	9.81492	-0.0110831	0.102285	0.365153	0.195755	0.499005	13
2017-05-09	0.0484257	2.06301	1.06308	0.0464331	2.03924	0.704687	0.0970394	0.386159	-0.038427	-2.73238	-0.00158442	-0.890752	-0.58	-0.610253	-1.07238	14
2017-05-10	-1.07805	-0.287521	0.0468508	0.00523294	0.316768	-0.665352	-0.265894	0.656081	-0.148108	2.3461	0.0332742	0.174691	0.226311	0.197088	0.148557	15
2017-05-11	0.697743	-0.411373	0.0868297	0.748474	-0.549937	0.177556	0.107605	0.783918	0.165258	-0.264802	-0.0298449	-0.0353125	0.260145	0.330494	0.147981	16
2017-05-12	0.406355	-0.752939	-1.12942	0.074209	-1.10414	-0.495532	-0.329171	-1.73678	-0.486985	1.55205	0.0119609	0.667352	-0.264225	0.726945	0.198271	17
2017-05-15	-1.18056	0.345816	-1.04438	-0.504557	-0.917627	-0.598648	-0.387426	0.244359	1.0073	3.16469	-0.00532911	0.128438	0.987302	0.979242	0.499626	18
2017-05-16	-0.997393	-0.49054	-1.82558	0.0740381	-1.82557	-0.0955224	-0.324515	0.213523	-0.847061	2.77925	0.0171456	0.0264687	0.426092	0.124825	-0.714559	19
2017-05-17	0.0660669	-2.80862	-1.20623	-0.43466	-1.49394	0.0508494	-0.361751	0.856604	0.249927	1.87319	-0.0182015	1.97978	0.59181	0.318727	-1.19759	20
2017-05-18	0.169085	-1.03727	0.0849555	-0.884962	-0.958627	-0.13731	0.556411	0.912252	1.55816	-0.663235	0.00455837	-0.183465	-0.324425	-0.654926	-0.855688	21
2017-05-19	-1.15585	1.00134	-1.1611	-0.117674	-0.17551	-0.366719	-0.271844	0.887038	3.86234	-1.40136	0.0253171	-0.392677	-0.155579	0.579773	0.262008	22
2017-05-22	-0.590053	-0.530782	-0.884332	0.169128	-0.372511	-0.573787	-0.0186951	1.71774	3.64408	-1.03831	0.0022795	0.542462	0.589996	-0.264565	-0.922467	23
2017-05-23	-0.193023	0.746755	0.742861	0.3061	0.108444	-0.198731	0.26611	1.44895	1.34948	1.00244	-0.00140331	0.0638403	0.616878	0.961559	1.23015	24
2017-05-24	-0.661447	0.570984	0.453562	0.677183	0.654232	0.445267	0.00767288	1.57808	1.45689	-1.4561	0.0148866	-0.717848	-0.387157	-0.907121	-0.807218	25
2017-05-25	0.0494055	-0.528299	-0.827436	-0.255621	-1.05019	-0.0742964	-1.12222	-1.34276	-1.47569	-2.54274	-0.0136021	0.329633	0.38134	0.640305	0.316992	26
2017-05-26	-0.054747	-0.655942	0.938447	2.20006	0.742914	0.529907	-0.786323	-0.658897	-1.6927	1.82883	0.0269518	0.64804	0.444626	0.697059	0.684724	27
2017-05-30	0.136173	-1.00698	-0.245796	-0.867662	-0.175712	-0.532862	-0.00814309	-0.574396	6.42904	-4.03169	-3.96044e-05	-0.256135	-0.0856405	-1.28824	0.879959	28
2017-05-31	0.621109	0.0217577	-1.02027	-0.643193	-1.29477	0.57174	-2.27807	1.04476	-0.513202	2.52706	0.0523907	0.248998	0.112528	0.382492	0.861269	29
2017-06-01	-0.245054	0.812987	0.432676	0.15678	0.635956	1.03578	-0.376282	0.980444	-0.574088	4.04951	-0.0260027	-0.169612	-0.616371	-1.04475	0.446051	30
2017-06-02	0.274318	-1.21405	-1.07528	0.129322	-1.51992	-1.14305	0.290665	0.67495	0.232266	-1.73271	-0.013209	0.81505	0.180072	0.0602426	0.687219	31
2017-06-05	-0.279659	-0.0258433	0.392765	-0.435581	0.352072	-0.802978	-0.301613	1.76778	1.97873	-0.350937	-0.0133375	0.374103	1.06611	1.16171	0.190254	32
2017-06-06	-0.574999	-1.86351	-0.301858	0.225503	-0.619695	-0.736975	-0.462155	1.26996	1.27982	-0.250924	-0.0134685	1.09639	0.110645	0.633546	0.62445	33
2017-06-07	1.08874	0.295136	0.586164	-0.544932	0.661587	-0.754177	-0.0615936	-1.48181	-0.764564	-0.398264	0.0133893	-0.26435	0.110349	-0.70829	-0.538003	34
2017-06-08	-0.348599	0.86979	0.374566	0.0327008	0.417619	0.132179	0.285737	0.818812	0.379887	0.476802	-0.0134685	-1.57731	-0.0195589	-0.262922	0.574959	35
2017-06-09	-1.04354	0.785868	0.530448	2.80158	0.570658	0.214768	-0.114981	0.0495573	1.31145	-0.285423	-0.0136021	-0.616244	-0.836375	-0.393811	1.91815	36
2017-06-12	0.223245	-1.44481	-0.264736	1.11094	-0.242739	-0.156147	0.013227	-1.30779	5.48186	-1.77689	-3.96044e-05	-0.0660924	-0.748153	0.318727	0.0860191	37
2017-06-13	-3.87327	0.613312	0.20088	-1.12837	0.108877	-0.0324778	0.0292516	0.41508	-0.215689	0.801682	0.0135229	-0.433099	-1.06226	-0.982378	-0.558082	38
2017-06-14	-0.444588	-1.56374	-1.59797	-0.954762	-0.639424	-1.63061	-0.505273	-2.16086	-2.21618	-0.0434154	-3.96044e-05	1.10838	0.453696	0.842499	0.22557	39
2017-06-15	1.49645	2.37124	2.4284	0.56112	1.93041	0.744163	0.916081	-0.274909	0.103844	-0.934826	0.0133893	-1.86103	-0.357197	-1.3806	-1.41222	40
2017-06-16	-0.900987	0.259621	-0.809747	-0.133902	-0.197664	-0.82906	0.183886	0.543364	0.442341	0.272063	-0.0134685	0.0207727	-0.359206	0.127082	0.374292	41
2017-06-19	-0.58578	0.764687	0.667747	0.492682	0.152139	0.334898	0.434204	0.888517	0.30338	1.49312	-0.0136021	-0.685408	-0.326978	-0.336613	0.0888611	42
2017-06-20	1.1621	0.163356	0.708819	1.61633	0.326748	0.601975	0.550681	1.08906	-0.576539	1.19082	-3.96044e-05	-0.57479	-0.294217	0.193787	-0.384524	43
2017-06-21	0.963551	0.163152	-0.363849	-0.542778	-0.306716	0.522098	-0.0613274	-0.679019	-1.16534	-1.65053	0.0135229	-0.0268031	-0.295545	-0.270772	0.888855	44
2017-06-22	-1.5329	-0.37249	-0.090565	0.117508	-0.329117	0.132198	-0.00814309	0.321864	-0.0703287	0.22763	-3.96044e-05	0.673624	0.222002	1.04999	0.319116	45
2017-06-23	0.473303	-0.183637	-0.926494	-0.946849	-0.768805	-0.751428	0.363984	-0.151789	0.145375	0.611178	-0.0136021	0.373643	0.42636	-0.398825	-0.144385	46
2017-06-26	-0.61986	0.321115	0.00689386	-0.0645722	0.328419	-0.257615	0.188399	-2.3314	-4.31009	-2.28235	-3.96044e-05	-0.965418	-0.637917	-0.335179	-1.13342	47
2017-06-27	-0.922659	1.44894	-2.00179	-0.816403	-1.47667	0.02905	-1.5088	1.16729	1.71953	0.793496	0.0135229	0.323138	0.427704	-0.137722	0.137135	48
2017-06-28	-2.37234	-0.401209	-1.22005	-1.99805	-0.64313	-1.03188	-0.627239	-0.102858	1.82022	0.312491	0.0133893	-0.188657	0.390212	0.0610252	-0.33927	49
2017-06-29	-0.594375	0.193217	-1.06103	-0.652978	-0.845459	-0.863534	-0.778148	-0.217396	-1.51157	-0.661436	-3.96044e-05	-0.447488	0.150315	-0.73824	-0.342003	50
2017-06-30	-0.505901	0.0992117	0.178171	-0.145264	0.399043	0.0690301	-0.259818	-0.736887	-0.611237	-0.530491	-0.0134685	-0.162951	-1.25408	0.793945	-0.491028	51
2017-07-03	0.320959	1.40593	0.846197	0.607989	1.04068	0.474462	1.01354	0.758464	-0.132176	0.275404	-3.96044e-05	-1.20155	0.0150963	-0.73744	-0.152322	52
2017-07-05	-0.0386075	-0.211935	0.600174	0.238664	0.46279	1.29253	0.0506096	0.4234	-0.606409	-0.0440358	-3.96044e-05	-0.850866	-1.8859	-0.67859	0.141214	53
2017-07-06	-1.17363	0.0982399	-1.38761	-0.447619	-0.376673	0.0700113	-0.0348477	-0.166516	0.00389466	-0.102251	-3.96044e-05	0.357557	0.194814	0.264982	-0.299617	54
2017-07-07	-1.14323	1.24098	0.254576	1.20161	0.241937	-0.318745	0.253477	-0.92011	-1.82898	-1.15067	-3.96044e-05	-0.880645	-0.629051	0.397865	-0.05477	55
2017-07-10	0.23314	-0.0566329	0.00689386	-0.0499501	0.329949	-0.011879	-0.0775342	-1.60607	-2.8079	-2.70357	-3.96044e-05	-0.390424	-2.29923	-1.08619	-0.203009	56
2017-07-11	0.685261	0.158814	-0.640294	0.461006	0.329501	-0.31814	-0.0935658	-0.23795	-1.18038	-0.790612	-3.96044e-05	-0.129754	1.05808	-0.278503	0.437393	57
2017-07-12	-2.78493	-1.58613	0.36832	-0.519495	-0.508279	-1.21068	-0.783204	0.690942	2.84128	1.25312	-3.96044e-05	0.643184	1.14642	1.88233	1.29532	58
2017-07-13	-0.533784	0.284228	0.502453	-0.435444	0.836287	-1.12113	-0.222244	-0.430075	-1.51217	-0.254078	-0.0136021	-0.0442072	0.411616	-0.338059	0.136477	59
2017-07-14	-1.54792	-1.16026	-1.26784	-2.15474	-0.661965	-1.71075	-0.458167	-1.29077	-0.743296	-0.606639	-3.96044e-05	0.963053	-0.88519	0.261147	-0.433129	60
2017-07-17	0.329315	0.12999	-0.3343	0.290809	-0.575637	0.0278816	-0.281644	-0.05827	-0.581534	-0.922829	-3.96044e-05	0.283484	1.27402	0.58992	-0.101178	61
2017-07-18	-0.187049	-1.38625	-2.02909	0.441281	-2.22565	-2.22294	-1.2926	0.797384	2.90232	0.46381	-3.96044e-05	0.533483	0.334626	-0.00524772	0.423013	62
2017-07-19	-1.42728	-0.214315	1.13564	-0.131147	0.512326	-0.462067	0.314741	-0.41355	-2.5785	-1.25753	-3.96044e-05	0.0699404	0.191902	-0.137006	0.136313	63
2017-07-20	-0.0769145	-0.16733	-2.17008	0.825088	-0.895722	-0.246243	0.30908	5.00989	2.56686	2.18206	-3.96044e-05	-0.356777	-0.195722	-0.468657	-1.00907	64
2017-07-21	-0.690546	-0.813961	-0.384893	0.114833	-0.854682	0.908072	0.491325	-1.58281	-0.878045	-0.664441	-3.96044e-05	0.811449	0.855872	1.24448	0.139316	65
2017-07-24	-0.487257	-0.152271	0.249345	-0.815126	-0.249204	-0.306073	-0.948573	0.671698	0.760803	0.538782	-0.00427153	0.557146	0.223175	-0.00524772	-0.247289	66
2017-07-25	-0.133308	0.71562	-0.254196	-0.240138	0.920116	-0.461897	0.0295209	-1.55468	-1.89989	-1.27107	-0.0137812	-0.153194	-0.680825	-0.725649	0.620021	67
2017-07-26	-0.114704	0.806537	0.454669	-0.0220096	1.89694	0.516536	0.180118	-0.252668	0.019229	-0.189194	0.0158879	-0.602792	0.190091	-0.40181	-0.00555417	68
2017-07-27	0.426498	-0.779528	-0.440882	-0.22616	1.70415	-0.794076	-0.654017	1.07361	-0.0980129	-0.0128126	0.00105201	1.07797	1.42682	0.719824	0.891942	69
2017-07-28	-1.74288	-1.20999	-1.812	-0.795509	0.659733	-0.576519	-0.266815	0.878966	-0.998338	-0.756479	0.000914844	0.275274	-0.807081	-0.267914	-0.192878	70
2017-07-31	1.00935	-0.803819	-1.3198	-0.967081	-0.750243	0.0464369	-0.666431	0.547537	0.789032	0.0932667	-3.96044e-05	0.175295	0.665857	0.714381	0.87672	71
2017-08-01	0.930493	-0.105423	0.503455	-0.129391	0.131287	0.260552	-0.386389	-1.12695	1.94541	0.965677	-3.96044e-05	0.239255	-0.0877314	0.18955	-0.00555417	72
2017-08-02	0.0718215	0.13328	-1.13167	-0.398028	0.659799	-0.187068	0.15401	-0.265825	-0.634514	-0.539192	-0.00126687	-0.169177	-0.258806	-0.0701113	0.269167	73
2017-08-03	0.350844	-0.519594	-0.340831	1.24481	0.152884	0.729155	-0.278439	0.669335	0.481224	0.271585	-0.00824977	-0.182212	-0.708698	1.02438	-0.23436	74
2017-08-04	1.40606	0.991992	2.32332	1.47151	0.701324	0.399162	0.651026	0.485161	-0.338217	-0.0586676	0.00939783	-0.952121	0.772237	0.629557	-0.51346	75
2017-08-07	0.827459	-0.0258433	-0.620611	0.209842	0.17428	0.360955	-0.359191	3.66398	3.31325	0.25818	-3.96044e-05	-0.0271279	-2.00233	-0.00524772	-0.566892	76
2017-08-08	-0.481941	-0.0575615	1.18959	0.730079	0.851408	-0.011879	-0.862877	0.128692	1.52874	1.2842	-3.96044e-05	0.276082	0.89341	0.372489	1.01778	77
2017-08-09	0.973265	-1.13961	-0.437371	-0.391747	-2.54643	0.63781	-1.79442	-0.579072	-0.137333	-0.907853	-3.96044e-05	0.744164	0.672924	0.432509	0.223507	78
2017-08-10	-0.11295	-1.09853	-0.0485755	0.265223	-0.0232109	-0.327219	-1.42603	0.454456	0.0797114	-0.261215	-3.96044e-05	1.0874	1.64235	0.181405	0.222237	79
2017-08-11	-0.297003	-0.524386	-1.09953	-0.131651	-0.57607	0.145711	0.821448	1.3865	0.678913	-0.257898	-3.96044e-05	0.0912255	0.013859	0.118871	-0.279055	80
2017-08-14	0.162936	0.649262	0.467219	0.183203	2.09226	0.303782	0.444059	3.71035	-0.617548	-0.757847	-3.96044e-05	-0.376179	-0.42187	-1.00534	0.176982	81
2017-08-15	0.860265	1.47577	0.93048	1.55976	0.108642	0.819795	0.807664	-0.92091	-0.733932	-0.892612	-3.96044e-05	-1.07953	-0.28935	-1.02201	-0.694289	82
2017-08-16	-0.681736	0.577567	0.618619	0.0328695	0.59009	-1.19863	0.290527	1.12387	0.842796	0.189054	-3.96044e-05	0.157173	-0.733887	0.695592	0.409071	83
2017-08-17	-1.07114	-1.49031	-0.604831	-0.381288	-2.41955	-0.719599	-0.932101	-0.607031	-0.163416	-0.237085	-0.000175913	1.00522	1.13253	0.750232	1.39139	84
2017-08-18	-1.20593	-0.923274	-0.215125	0.571497	0.219869	-0.305813	-0.171439	-0.970578	-0.429773	-0.104227	9.67044e-05	0.847733	0.414876	0.61725	0.215375	85
2017-08-21	0.0344452	-0.718068	-1.21017	-0.76775	-0.266447	-0.0705991	-0.389452	-0.600223	1.61862	2.9147	0.0135229	-0.297742	-0.453994	-0.191331	0.0824857	86
2017-08-22	-0.522831	0.794867	0.965224	0.958141	0.881963	0.438877	-0.171684	0.414422	-0.544975	2.79209	-3.96044e-05	-0.790205	-0.0195589	-0.504262	-0.00555417	87
2017-08-23	-0.0212694	-0.443765	-0.730658	0.657253	-0.00108792	0.381149	-0.177213	0.227374	0.178223	0.167899	-3.96044e-05	0.154898	0.114466	0.307114	0.0383951	88
2017-08-24	-0.561319	0.295724	0.0253022	-0.203119	-0.442294	-0.247815	0.160927	0.881762	0.443288	-1.66033	-3.96044e-05	0.146034	-0.456294	-0.130001	0.21349	89
2017-08-25	-0.637425	-0.186553	-1.33283	-0.977663	-1.575	-0.482679	-0.74499	0.185264	0.124993	-0.0649661	-3.96044e-05	-0.366958	0.283152	-0.130256	-0.444816	90
2017-08-29	0.42691	-0.379923	-2.73837	-0.876123	-2.08081	-0.871322	-2.86042	1.10553	2.04102	0.166551	-3.96044e-05	2.74317	1.89366	1.60022	0.477377	91
2017-08-30	1.68927	1.86501	1.78463	0.046449	2.32285	1.31836	-0.156856	-0.119571	0.445948	0.67777	-0.0136021	-0.896664	-0.540973	-0.740986	-0.224365	92
2017-08-31	-1.73194	-0.249121	0.608809	0.638413	0.620264	-0.541428	-0.173451	0.675566	0.163952	1.45569	-3.96044e-05	0.217633	-0.347878	-0.190577	-0.0494565	93
2017-09-01	-2.68688	0.0220259	0.299333	-1.14931	0.375304	-0.948865	-1.86475	0.809912	0.098679	-0.360296	0.0135229	0.664316	0.504849	0.793811	0.474809	94
2017-09-05	-0.323834	-1.87023	-0.595831	-0.555583	-1.06614	-0.594637	-1.15669	-2.49643	-3.56426	-2.07472	0.0133893	1.19221	1.20694	0.420719	1.61194	95
2017-09-06	-2.7601	-0.33244	-0.575974	-0.812296	-0.870603	-0.128169	-0.697905	0.982235	1.05381	0.837738	-3.96044e-05	0.134667	-0.371896	0.297203	-1.14824	96
2017-09-07	-1.49955	-0.81902	-1.5338	-0.280016	-0.851922	-0.437531	-2.19174	0.0308938	-0.195502	-0.277461	-0.0134685	0.406879	0.0446643	-0.247088	-0.523802	97
2017-09-08	-0.021924	-0.904125	-0.227781	-1.57568	-0.923083	-0.648178	-0.327567	-1.58451	-1.61496	-0.929917	0.0133893	0.170052	1.31271	0.417346	-0.136144	98
2017-09-11	0.0935795	2.09726	1.4006	0.517153	1.74848	0.895155	2.67857	-0.615495	-0.412449	0.102622	-0.0134685	-1.03465	-1.15959	-1.22051	-0.267987	99
2017-09-12	0.343502	1.54582	-0.0657271	-1.43247	1.42404	-0.35988	0.436789	-0.363493	-0.219329	-0.329226	-0.0136021	-0.684991	-0.340315	-0.808353	0.430907	100
2017-09-13	0.726459	0.881858	1.28128	0.836878	0.973333	1.05391	0.358516	-1.64925	-1.11744	-0.758266	-3.96044e-05	0.0332105	0.49279	0.0569063	0.0378379	101
2017-09-14	0.284518	0.101179	0.226112	-2.39855	0.484522	0.124294	0.657563	-3.98109	-3.61212	-1.98854	0.0135229	-0.300127	-0.531908	-0.129619	-0.617255	102
2017-09-15	-0.462343	0.259621	-1.32328	-2.36647	-1.43942	-0.53646	-0.119009	2.96279	2.49209	0.98085	-3.96044e-05	-0.193358	-0.180615	-0.254754	-0.403657	103
2017-09-18	0.91577	0.985399	0.388712	1.22666	0.818749	0.785406	1.23716	2.15082	2.27148	0.583679	-0.0136021	-0.943882	-0.570574	-1.0136	0.304414	104
2017-09-19	0.588575	-0.0100887	-0.756073	-0.415991	-0.0232981	-0.944878	0.406009	-1.11824	-0.853148	-0.625745	-3.96044e-05	-0.261353	-1.27081	-0.644041	-0.717522	105
2017-09-20	0.0925515	-0.0100901	-0.319274	-0.611635	-0.222561	-1.09334	-0.560451	-0.197571	0.018731	-0.25301	-3.96044e-05	0.0884489	0.741051	-0.32717	-0.36622	106
2017-09-21	1.15593	1.22985	0.950495	-0.151923	1.67573	2.51031	0.880661	-1.62158	-1.69889	-0.834677	-3.96044e-05	-1.66333	-1.44991	-0.784865	0.399973	107
2017-09-22	-0.438844	-0.479996	-0.410974	0.595285	0.064898	-0.694968	0.20132	-0.151952	0.323809	0.110908	-3.96044e-05	0.174706	0.0477695	0.125382	-0.00555417	108
2017-09-25	0.793206	-0.60699	2.14097	0.97982	-0.242902	0.729901	1.58642	1.91051	1.95447	0.849483	-3.96044e-05	-0.179699	-0.0868873	-0.529455	0.0392583	109
2017-09-26	0.601896	0.790357	1.47825	0.468055	0.548315	1.10748	0.98902	-0.278162	-0.372263	0.298817	-0.000312236	0.515095	0.182189	-0.00524772	-0.095228	110
2017-09-27	0.430897	0.911237	0.468745	0.283506	0.875146	0.264289	0.150493	1.70345	1.11299	1.35134	-0.00167654	-1.53258	-0.423769	-0.666905	0.0841197	111
2017-09-28	1.33068	-0.181677	-0.528763	-0.445086	-0.745486	0.680697	1.03494	-0.138098	-0.42248	-0.518255	-0.000995391	0.0149062	-0.256677	0.0612419	0.484182	112
2017-09-29	0.670498	-0.0570265	-0.674618	0.442291	-0.462227	-0.190265	-0.324574	-0.171455	-0.594165	-0.401228	0.000643169	-0.0744305	0.116057	0.127514	0.303083	113
2017-10-02	-0.0400182	-0.0882264	1.26105	1.79108	1.09561	0.285545	-0.00814309	1.13497	0.203756	0.397215	-0.00660839	-0.85583	-0.975709	-0.538039	-0.00555417	114
2017-10-03	-0.170808	0.285851	-0.251908	0.233084	-0.0446941	-0.0714094	-0.00814309	-0.494694	-0.324943	-0.015149	0.00843913	-0.263342	0.083655	-0.340621	-1.11865	115
2017-10-04	-0.358025	0.0364293	-0.0115802	-0.222618	0.501838	-0.566399	-0.00814309	-0.547982	-0.0494447	0.622239	-0.00509314	0.204143	0.71473	0.330125	0.398643	116
2017-10-05	1.28525	-0.181566	1.00675	1.83627	0.805526	1.09915	-0.00814309	0.48444	0.179805	1.41522	0.00310399	-0.0317485	-0.582239	-0.00524772	0.483123	117
2017-10-06	-0.0957602	-0.119343	-0.475092	0.94148	-0.305611	0.68657	-0.00814309	0.207997	0.706476	-0.287554	-0.00208895	-1.14639	-0.139631	-0.072175	0.564576	118
2017-10-10	-0.898222	-0.853929	-1.32228	-2.05073	-0.699247	-0.471214	-4.51711	1.85645	-0.535214	1.31353	-0.00373621	2.47805	1.65558	0.925118	-0.0491304	119
2017-10-11	0.296228	0.287101	-0.783058	0.0724862	-0.241547	0.127775	0.86396	0.231673	0.18306	0.226619	0.00269958	-0.235055	0.0804023	0.257986	0.125036	120
2017-10-12	-0.769366	0.0210503	0.135295	0.49021	0.632927	-0.927313	-0.0908478	2.59033	-0.0405151	-0.904628	-0.00346445	0.0314749	0.130055	0.452695	1.52997	121
2017-10-13	0.446432	-0.714873	0.0619462	-1.73987	-0.306683	-1.15848	-0.394348	0.772019	1.769	0.695854	0.00105728	0.735045	-0.00295927	0.319762	0.617684	122
2017-10-16	0.688008	-0.371374	0.502994	0.259219	-0.197753	0.50107	0.543452	0.425708	-0.182421	-0.1462	-0.00292082	0.257183	0.673304	0.253519	0.404745	123
2017-10-17	0.667386	0.914918	1.03947	1.38846	1.52542	0.502769	1.83362	-0.679477	-1.00279	-1.57844	0.0103589	-1.61804	-1.01196	-1.11267	-0.871968	124
2017-10-18	-1.75632	0.941012	-0.380896	-0.00824833	0.303212	-0.110982	0.156336	-0.141034	-0.149985	-0.77239	-3.96044e-05	-0.440452	-0.555976	-0.400952	-0.50898	125
2017-10-19	0.259348	-0.649011	-1.22573	0.0321965	-1.41598	-0.802438	-0.688473	0.434024	-0.382851	-0.219414	-0.000175913	0.474232	0.232514	-0.0714487	-0.94484	126
2017-10-20	2.43493	1.46606	1.33179	0.0322006	2.04293	1.29471	0.315721	1.06996	-0.272504	-0.387109	-0.000721353	-0.495323	0.147874	-0.137866	1.06017	127
2017-10-23	0.478118	0.22158	0.154605	-0.291186	0.41009	0.0875543	1.06021	-0.38483	-1.04635	-1.12532	0.000778453	-0.591267	-0.287687	-0.40484	-0.471068	128
2017-10-24	0.292708	0.375478	-0.0669741	1.04487	0.624872	0.526164	-0.254406	-1.5718	0.62766	0.785053	-3.96044e-05	0.0794734	0.114663	0.593163	-0.0907629	129
2017-10-25	2.54783	-0.365363	-0.65679	-1.71966	-0.0221348	1.71442	0.0739632	0.823129	-0.0803517	-0.126385	-3.96044e-05	-0.177238	-0.507621	-0.403536	0.418733	130
2017-10-26	0.398465	0.00504932	1.89262	0.959943	1.35242	0.109279	0.221656	0.537413	-0.0532066	-0.0545255	-3.96044e-05	-0.160238	0.250232	0.722972	-0.132381	131
2017-10-27	0.906448	0.128538	2.24656	0.992213	0.875563	0.55478	0.57118	-0.519698	0.0176901	-0.147218	0.0135229	-0.680583	-0.866925	-0.666905	0.0790403	132
2017-10-30	-0.65688	-0.892132	-0.854376	-1.17041	-0.427301	-0.376397	-0.00814309	1.2954	0.579268	0.123629	-0.0136021	0.424176	0.0316392	0.0612419	-0.174918	133
2017-10-31	1.06855	0.547005	-0.403814	-1.1493	-0.000422608	0.190525	-0.937694	1.10583	-0.214439	-0.353863	-0.000175913	-0.212045	0.2697	-0.204934	0.374536	134
2017-11-01	-0.0751407	0.60676	0.567142	0.326674	1.00169	-0.173824	-1.70936	0.916084	-0.886869	-0.521674	9.67044e-05	0.538248	0.386328	1.05227	1.03216	135
2017-11-02	-1.49328	-0.334145	-1.00052	2.55711	-0.767558	-0.939798	0.266786	0.877088	-0.249601	0.652273	-3.96044e-05	0.130464	0.450357	-0.00524772	-0.00555417	136
2017-11-03	-0.714972	0.605595	1.0517	0.0188329	0.554039	1.44298	1.5933	0.348974	1.026	0.338161	-3.96044e-05	-1.08203	-0.00284752	-0.597846	-0.293481	137
2017-11-06	-0.533742	-0.564734	0.306337	-1.05245	-0.234772	-0.478108	-0.276385	-0.658181	-0.399568	-0.328443	-3.96044e-05	0.265107	-0.590508	-0.204067	-0.0468519	138
2017-11-07	0.930479	-0.0258433	0.438067	-0.08938	0.148843	0.718492	0.369529	0.403783	-0.344978	0.246151	-3.96044e-05	0.349792	0.28342	0.457659	0.241612	139
2017-11-08	-1.17428	-0.458149	-0.255661	0.600781	0.0422548	-0.82319	-0.725508	0.994025	0.867299	0.6769	0.0135229	0.663328	-0.0531439	0.126369	0.219715	140
2017-11-09	-0.627486	-0.36626	-1.05882	-0.333392	-0.81168	0.170297	0.69828	-1.01091	0.609814	-0.108178	-3.96044e-05	0.0148293	0.332102	0.387906	0.421105	141
2017-11-13	0.768918	0.314574	-0.142262	0.438788	0.384286	0.922594	0.0301507	-2.02895	-0.366499	-1.00723	-3.96044e-05	-0.636726	-0.60687	-0.0705977	-0.945987	142
2017-11-14	-0.0760457	-0.211444	-1.99675	-0.360649	-1.28569	-0.134086	-0.199652	0.202531	1.05773	0.293228	-3.96044e-05	-0.339695	0.0141649	-0.464668	-0.254468	143
2017-11-15	0.94941	-0.5683	-0.54641	-0.49494	-0.237043	1.05046	-0.830043	2.14939	-0.218792	0.183962	-0.0136021	0.5958	0.584089	0.715154	-0.255985	144
2017-11-16	-0.863036	-0.429899	0.412513	-0.426217	0.536612	-0.298608	0.392081	1.62635	-0.02416	1.10823	-0.0206398	-0.240625	-0.270304	-0.397139	0.0780927	145
2017-11-17	0.894236	-1.4474	-0.490805	-0.33111	-0.925398	0.541574	-0.161601	-0.489723	-0.02062	-0.205079	0.0205606	0.317189	0.13102	0.386644	0.575252	146
2017-11-20	0.179949	0.772272	1.07744	-0.249963	0.9029	0.234735	-0.00814309	1.4693	1.74027	0.92761	-0.00728282	0.103963	0.180597	-0.135599	0.117843	147
2017-11-21	-0.496072	-0.0726909	0.00689386	0.126069	-0.129373	-0.648165	0.101477	-0.44397	-0.398369	-0.523322	-0.0193598	-0.29957	-0.504476	-0.529455	-0.25272	148
2017-11-22	-0.735557	-1.34268	-0.879447	-0.785425	-1.66126	-0.19612	-0.990418	0.315832	0.894448	0.350385	0.0244778	0.256878	-0.137228	0.714381	0.282662	149
2017-11-24	-0.425124	-0.151772	-2.68525	-0.595456	-1.06442	-0.583679	-0.492025	-0.141482	3.52639	0.110328	-0.0103163	0.247542	0.265788	-0.20067	-0.00555417	150
2017-11-27	0.73154	-0.878235	0.462393	0.0452157	0.368865	0.273758	-0.178755	3.75838	0.0712591	0.298526	0.00928116	0.318396	0.147629	0.837097	0.0764231	151
2017-11-28	1.07609	0.179741	0.609619	1.37003	0.606773	-0.256743	0.415488	0.34094	-0.314048	1.61426	-0.00743617	-0.310587	-0.119813	0.44355	0.361332	152
2017-11-29	0.834958	0.951336	0.372997	-2.72718	0.150911	0.908358	0.250194	-0.203676	-1.74508	-2.31551	0.00872231	-0.731271	-0.607907	-0.647403	0.0755329	153
2017-11-30	0.614521	0.836482	-0.724697	-0.918248	0.0425992	-0.011879	-0.0136377	0.194443	0.433901	-0.011297	0.0151595	-0.363955	-1.12856	-0.328878	-0.167889	154
2017-12-01	-3.27047	-0.683964	-0.212104	0.0183918	-1.631	-1.07478	0.250015	1.90557	1.0359	0.615763	-3.96044e-05	-0.454668	-0.538761	-0.395884	0.237708	155
2017-12-04	-0.168187	1.41255	1.14077	0.532388	2.10549	0.51866	0.255318	1.45793	0.124005	-0.0874612	-0.0136021	-0.228751	-0.333361	-0.398402	-0.0459979	156
2017-12-05	-0.11308	-0.0881379	0.520911	0.20332	0.236918	-0.175315	-0.0904541	0.0321662	-0.512778	-0.720573	-3.96044e-05	-0.6678	-0.177109	-0.666188	-0.946925	157
2017-12-06	1.79418	-0.712546	0.595835	0.906006	0.796637	0.827554	-0.194784	3.60111	-1.51134	-0.940081	0.0135229	-0.277528	-0.618704	-0.74065	0.200935	158
2017-12-07	0.799602	0.567377	-0.0299618	-0.657544	0.386265	0.790839	0.194961	4.47089	0.0202051	-0.954962	-3.96044e-05	-0.807294	-0.750521	-0.477889	0.64832	159
2017-12-08	0.633539	1.29389	0.541914	0.867326	0.17119	0.380697	0.134511	-1.13546	1.02991	1.81036	-3.96044e-05	-0.432192	-0.325407	-0.549932	-0.168049	160
2017-12-11	-0.402372	-0.350973	-0.749129	0.0584217	-0.580665	-0.693087	-0.139822	0.878874	2.52976	0.60462	-3.96044e-05	-0.359087	0.0165083	-0.554839	-0.0870435	161
2017-12-12	0.705422	0.40753	1.42892	0.537998	0.579641	-0.217717	0.183872	0.411765	3.4658	4.91276	0.0133893	-0.601597	-0.218211	-0.0742961	-0.0463596	162
2017-12-13	-0.220317	-0.691821	-0.677578	-0.554128	-0.666887	-1.13914	-0.22211	-1.11262	1.37945	3.34962	-0.027031	0.100676	-0.291567	-0.421187	0.0760161	163
2017-12-14	-0.420394	-1.00616	-0.288427	-0.989268	0.150084	-1.37412	-0.447444	0.195542	-0.134503	8.18752	-3.96044e-05	0.6779	1.07862	0.133714	0.480494	164
2017-12-15	-0.0572115	0.161306	0.00689386	1.65249	0.0854857	0.515335	-0.0246272	1.43391	-0.234642	-1.92196	-3.96044e-05	0.260521	-0.108783	0.202603	0.315312	165
2017-12-18	0.179082	-0.462836	-0.472148	-1.08579	-0.992429	-0.59981	-0.00814309	1.61288	2.39417	0.29385	-0.00208567	0.46765	0.354249	1.36262	-0.528242	166
2017-12-19	0.795366	0.878152	-0.324133	0.563214	0.0425575	0.454229	-0.00814309	-1.81615	0.30558	-0.409877	0.015569	-0.0748143	0.210625	0.800987	0.0348896	167
2017-12-20	-0.98246	0.455426	-1.07462	-0.685343	0.0641623	-0.437511	-1.7542	-1.43984	-0.137634	-0.395099	-0.0211194	0.310005	0.0863678	0.393909	0.596371	168
2017-12-21	-2.36005	0.175587	0.171522	0.483038	0.68968	-0.617908	0.334017	-1.20036	-0.202693	5.94627	0.000645502	-0.0531633	-0.160838	-0.2045	0.0740401	169
2017-12-27	-1.32884	-0.242778	-0.541383	-0.406287	-0.410255	-1.39684	-1.51717	-0.358933	-1.14466	0.998768	0.0203551	1.22129	1.22224	0.127659	0.85995	170
2017-12-28	-1.09503	-0.693823	-0.903838	-0.616873	-2.06106	-0.430948	-1.32884	-1.56895	-0.612246	0.509793	0.0133893	0.932123	0.804924	0.391744	0.0722311	171
2018-01-02	-1.47337	-1.07174	-1.76714	-1.91349	-1.20302	-0.628445	-2.30582	0.491792	3.12195	7.31684	-3.96044e-05	1.71239	1.06155	0.715928	1.14388	172
2018-01-03	0.501016	0.130657	0.367767	0.975148	0.983225	-0.329152	0.550882	0.548085	1.51741	2.90029	-0.0134685	0.183699	0.197562	0.964633	-0.043355	173
2018-01-04	-0.226397	0.754571	-0.606234	-0.218054	-0.17553	-0.328505	-0.539196	-0.0158632	-0.0685711	-0.0282271	0.0133893	-0.0863762	-0.00289143	0.505785	0.520518	174
2018-01-05	-2.36483	0.596001	0.457555	-0.296416	-0.000895883	-0.0711745	-0.231977	2.40786	0.368326	-1.14461	-0.027031	0.166683	0.0637056	0.438421	-0.192664	175
2018-01-08	0.524322	-0.181098	1.20115	-0.0471754	0.239264	0.403666	0.523237	-2.80912	2.6408	-0.568434	-3.96044e-05	0.178648	0.0303416	0.309695	-0.193521	176
2018-01-09	0.616905	-0.819784	0.934246	0.635156	1.54294	0.305475	1.62587	-0.345754	2.11476	-1.71989	0.0135229	-0.795865	-0.403249	-0.00524772	0.667137	177
2018-01-10	0.521744	-1.73483	-0.648119	0.0709785	-1.10864	-0.388664	-1.16736	0.344084	-0.505428	-0.820944	-0.0136021	0.672997	0.247628	-0.0681063	-0.490279	178
2018-01-11	0.763105	-0.230781	-1.38751	-0.388876	-0.677172	-0.880941	-0.561191	-2.39817	-1.61591	-0.3766	-0.00796814	0.219453	-0.43759	0.682659	-0.648181	179
2018-01-16	-1.95004	-0.990682	-3.73341	-3.00048	-2.83892	-1.44309	-3.15809	-3.94177	-1.82879	-6.47782	0.0481782	0.834306	0.265035	0.828536	1.01044	180
2018-01-17	0.391858	0.0851455	0.273202	-0.638716	-0.0233533	-0.479548	-0.374883	-0.384873	-0.0755426	1.4618	-0.0232621	0.0940492	0.363236	0.453088	-0.042739	181
2018-01-18	-0.0214428	0.0850754	-0.15293	-0.828428	-0.644651	-0.225757	-0.884173	0.0549218	-0.410708	2.37907	0.014554	-0.335495	-0.419055	0.0556044	0.105899	182
2018-01-19	0.26	-0.533473	0.00689386	0.415162	0.597917	-0.167242	-1.0565	0.601944	0.592027	-0.324374	-0.00818743	0.171943	-0.186844	0.479396	0.179532	183
2018-01-22	0.0723238	0.908961	0.148954	-1.10706	0.552151	-0.0701001	0.247142	-1.46805	-0.65303	-1.82838	-0.0109347	-0.245498	-0.0363145	0.355725	-0.750958	184
2018-01-23	-0.0964178	-1.11958	-0.826383	-0.300385	-0.820742	0.376675	-0.206682	0.0281316	-0.237801	-0.147261	-0.00857417	0.0123504	-0.204195	-1.15573	-0.194038	185
2018-01-24	-1.84775	-2.12129	-1.98353	-2.89726	-3.2442	-1.59881	-1.99953	1.04208	1.2819	0.179484	0.000775518	1.59622	0.682226	1.08522	0.445363	186
2018-01-25	-0.797902	-0.751462	-1.70467	-0.818977	-2.13083	-0.454097	-2.64786	-0.539625	-0.270889	-0.749406	-0.00112654	0.04759	1.06611	0.234455	0.0317997	187
2018-01-26	0.0921417	-0.543668	1.1581	1.06743	-0.320805	-0.318768	0.0493216	-0.219435	-0.0519714	-1.02962	-0.00330563	-0.198278	-0.411962	-0.184936	-0.493825	188
2018-01-29	0.357266	1.16932	1.23457	1.73071	0.885652	0.29501	0.732338	0.201619	1.9001	0.585487	-0.0124949	-0.806009	-0.233242	-0.36622	-0.0811907	189
2018-01-30	0.0162579	-0.380313	-0.66042	-1.02955	-0.547544	0.237916	-0.748624	-2.29262	-1.57177	-1.7961	-0.0128873	0.0320958	-0.151455	-0.4291	-0.0813302	190
2018-01-31	-0.893982	0.634185	-0.658376	-0.823285	-0.754643	0.122792	-2.07107	0.16602	0.674087	0.286273	0.00633031	-0.0409889	-0.234542	-0.0660392	-1.23738	191
2018-02-01	-0.249805	0.279184	-0.934999	-0.70721	-0.734542	0.779264	0.730785	-2.53218	-1.35019	-2.42443	-0.0097448	-0.353863	-0.15226	-0.432493	-0.477184	192
2018-02-02	2.13681	1.41187	0.634369	1.52103	0.75358	1.91522	0.0783517	-0.758641	-1.96763	-0.775281	0.0154557	-0.886435	-0.202528	0.0559708	0.309466	193
2018-02-05	1.68743	-0.519728	0.496186	1.31848	1.06971	0.046893	-0.781561	-5.56847	-4.70349	-3.71657	-0.00127828	0.147567	-0.892529	-0.127746	-0.241593	194
2018-02-06	1.00555	-1.48371	0.655153	0.907383	0.0664276	0.951225	-0.12372	2.26834	1.93811	1.45619	0.0157038	-0.233394	-0.256888	-0.497716	-1.08484	195
2018-02-07	0.146326	0.536307	1.76869	0.899183	1.60672	0.679728	-1.05579	-0.359909	-0.701224	-0.819415	-0.000584159	-0.608007	-0.411611	-0.377226	-0.823721	196
2018-02-08	1.07472	-0.877802	0.76888	-0.429533	-1.15593	1.04131	3.29813	1.55729	1.09061	1.11203	-0.000720604	-0.813965	-1.21213	-0.379508	-0.379115	197
2018-02-09	-0.0768143	-0.930538	0.220019	1.55736	0.17975	-0.410148	-1.48157	1.36238	1.41072	2.13521	0.00485601	-0.16525	0.0153613	-0.381818	-0.678169	198
2018-02-12	0.23821	0.427087	-0.720422	-0.329426	-0.00173305	-0.547927	1.62608	0.464253	-0.267888	1.62907	-0.00425422	0.625894	0.224286	-0.257592	0.66706	199
2018-02-13	-0.225013	-1.86094	-1.68662	-0.91824	-1.27577	-0.42753	0.737471	-0.979123	-0.508751	-0.754316	-0.000311963	0.198339	0.60273	0.247097	0.326667	200
2018-02-14	-0.670971	-0.991664	-0.572218	-0.798888	-0.344467	-0.32782	0.324022	2.2647	1.45823	1.75033	0.00200176	0.840941	-0.105583	0.183328	-0.00555417	201
2018-02-15	-0.878061	-1.07955	-1.49509	-1.33958	-1.97704	-0.779304	-0.00814309	1.22838	0.110383	-0.271067	0.00227025	1.2623	0.817944	1.6662	0.975283	202
2018-02-16	0.277066	-0.455725	0.7042	0.0810831	0.62001	-0.266847	-0.00814309	0.260708	0.145855	0.0360029	-0.00112611	-0.081417	0.0143653	0.360048	0.794288	203
2018-02-20	1.70576	1.83489	1.65443	0.435663	2.21839	0.419851	-0.506505	2.15219	-1.00782	-1.09915	-0.00180702	-1.04668	-0.925433	-0.309509	-0.124542	204
2018-02-21	0.994312	0.644445	0.605901	0.958413	0.498631	1.36985	-0.00814309	-1.6191	-0.915997	-1.0338	0.00132015	-0.817611	-0.486627	-0.127378	-0.244569	205
2018-02-22	0.494229	-1.13894	-0.204709	0.0944578	-0.661789	-0.348573	0.679074	-1.43256	-0.755951	-0.908116	-0.00126332	-0.229705	0.0845648	-0.49623	0.193721	206
2018-02-23	-0.849876	-0.552105	0.500955	-0.504021	0.271536	0.443822	-0.821491	0.680102	1.03729	0.70169	-0.00140058	-0.0860398	0.481046	-0.00524772	0.311289	207
2018-02-26	0.587015	0.500418	0.042227	0.348819	0.748264	-0.32903	-1.23734	0.199025	0.168289	-0.20448	0.000641055	0.402116	0.186311	0.424577	0.814713	208
2018-02-27	1.04403	0.809641	1.01631	0.592137	0.247725	0.762315	0.302422	0.60843	0.0530194	-0.0237957	0.0013207	-0.68944	-0.225429	-0.189088	-0.00555417	209
2018-02-28	1.0576	-1.42053	0.504471	1.44237	0.745019	0.0478345	0.629408	-0.603807	-0.401213	-0.653867	-0.0019444	-0.705595	-0.60692	-0.932851	-0.825822	210
2018-03-01	0.616639	0.451238	-0.0820428	0.508406	0.720053	0.766493	1.6237	1.1446	0.308718	0.390719	-0.00126553	-0.893005	-0.45533	-0.63158	-1.20653	211
2018-03-02	0.760098	-2.10816	-1.72895	-0.175557	-1.85603	0.14827	-0.79166	-0.207445	-0.303649	-0.262247	9.66635e-05	1.15467	0.433574	-0.0682361	-0.743369	212
2018-03-05	1.80348	0.505342	-0.275198	-1.11415	0.452078	-0.111992	0.35237	0.959039	-0.147684	0.639359	0.00091389	-0.21013	0.205666	-0.702446	-0.421252	213
2018-03-06	-1.62758	0.0735755	-1.48561	-0.379131	-0.251246	-1.2678	-2.29171	-1.37522	-0.744626	-0.635376	-0.000311963	0.852479	0.359579	0.565779	0.534037	214
2018-03-07	1.82006	-0.174992	0.322098	-0.0203618	0.949504	0.505208	0.750812	-1.71967	-1.42361	-0.808564	0.00349682	-0.217268	0.0662587	-0.448917	-0.67068	215
2018-03-08	-1.02959	0.206112	1.46628	0.826097	1.66428	0.167515	0.932597	-1.44681	-1.21344	-0.757538	0.00131812	-0.745108	-0.588354	-0.324141	0.203457	216
2018-03-09	-2.07016	1.06355	-0.204709	-0.495432	-0.113645	-1.24352	-0.604427	-0.249619	0.600767	0.267512	-0.0019408	-0.0862228	-0.00223919	-0.325817	-0.0472714	217
2018-03-12	0.234022	-0.388225	0.14794	-0.442884	-0.0688288	-0.308395	-0.0942264	-0.243147	-0.712415	-0.711327	0.000775518	-0.173088	-0.123556	0.57057	0.077838	218
2018-03-13	1.62943	0.171912	-1.39946	-1.1292	-1.14958	-0.347247	-0.525072	-0.00776843	-0.213338	-0.11332	-0.00221435	0.244338	0.170958	0.565185	0.284992	219
2018-03-14	0.376517	-0.80166	0.638626	0.526938	0.561989	0.066966	-0.238126	-2.47062	-2.03016	-1.66929	0.000368424	0.0128381	0.308026	-0.1948	0.569444	220
2018-03-15	1.91988	-0.191354	0.728612	-0.0584717	0.942061	1.19549	0.348268	0.0948964	-0.0865235	-0.0892175	-0.00221717	-0.449772	-0.312573	-0.322483	-0.829466	221
2018-03-16	0.765507	0.0238263	0.731017	0.413338	0.692418	1.64616	0.554504	0.0163085	-0.291297	-0.144005	0.000913509	-0.771543	-0.175295	-0.580462	-0.00555417	222
2018-03-19	-0.127551	-0.473375	-0.858241	-1.43172	-0.49366	0.551477	-0.0597784	0.811436	-1.32633	0.784469	0.000232591	0.138313	-0.681834	0.37883	0.490773	223
2018-03-20	-0.109764	0.950625	1.03131	0.246033	0.915115	0.270567	0.204089	0.700093	-0.00507685	-0.426181	0.00172834	-0.169674	-0.142399	-0.711249	-0.710468	224
2018-03-21	-2.26305	-0.224008	0.0600123	-0.640389	-0.179915	-0.354782	-0.742878	-0.0670273	0.0620158	-0.411489	-0.00194364	0.805259	-0.0371292	0.123725	0.244623	225
2018-03-22	-0.489897	-1.61926	-0.735585	-0.423883	-1.07597	0.230092	0.623359	-0.503497	-0.653446	-0.543935	-0.000175709	0.589333	0.938863	0.187702	-0.172169	226
2018-03-23	-1.08905	-0.878262	-0.873714	-0.661623	-0.563391	-0.51556	-1.15715	0.430076	0.07706	-0.31659	-0.000992718	1.37067	0.0149914	0.251073	0.077838	227
2018-03-26	-0.0752759	0.258756	-1.3947	-1.05906	-0.497307	-0.13252	-2.46192	-2.06719	-1.90492	-1.1528	0.00376886	0.416004	0.256094	-0.261568	-0.424218	228
2018-03-27	-0.456965	1.17443	0.531431	0.94398	0.741651	0.189241	0.547572	-1.00361	-1.37851	-0.448252	0.00131799	-0.940616	0.0834687	-0.0694965	0.162424	229
2018-03-28	0.814423	0.935116	1.04219	0.646425	1.45508	0.714318	0.94501	0.382037	-0.0941689	0.0512417	-0.00411644	-0.788018	-0.657878	-0.651485	-0.131473	230
2018-03-29	0.26906	-0.0754193	0.958799	1.02838	0.511708	0.170202	-0.412206	-2.48676	-2.56738	-1.77254	-0.00453825	-0.76001	-0.630014	-0.200461	-0.300876	231
2018-04-03	-1.83846	0.271403	0.643823	-0.488127	0.688351	-0.0523599	0.0207334	0.851134	1.28522	1.09748	0.00609124	0.735578	0.815985	-0.594665	-1.03452	232
2018-04-04	0.0155762	0.15556	-0.541684	-0.0957999	0.131977	-0.557341	0.937737	-1.97375	-1.5898	-1.46829	-0.00344222	0.261561	-0.227301	-0.533998	-1.01644	233
2018-04-05	-0.440993	1.48406	1.10544	1.08166	0.862896	0.250512	-0.00814309	-0.138316	0.0924377	-0.0799924	0.000505386	-0.839626	-0.559752	-0.538621	-0.49796	234
2018-04-06	-0.258739	-0.76276	-0.77329	-1.22263	-0.665658	0.0689458	-0.00814309	-0.573382	-0.547945	-0.453138	-0.000175832	0.234225	-0.124705	-0.00524772	-0.140878	235
2018-04-09	-1.15846	0.0233808	-0.805769	-0.599247	-0.60112	-0.496198	-0.0657482	0.472439	1.23523	0.325346	0.000777554	0.00832148	0.208014	0.793074	0.932478	236
2018-04-10	-1.68231	0.367454	-0.310279	-0.308788	0.020946	-1.09611	-1.37607	0.1874	0.64217	0.102988	-3.96044e-05	0.519031	0.502173	0.390029	0.868322	237
2018-04-11	-0.521923	-0.879102	-0.801561	-0.408427	0.109924	-0.0718925	-0.836014	0.29501	0.549546	1.22781	-0.00140181	0.904655	0.23953	0.256855	0.338855	238
2018-04-12	0.034457	0.827416	1.13252	-0.619695	1.06366	0.148209	1.2705	2.83422	2.28799	2.25236	-0.000312208	-0.815489	0.289804	-0.333052	-0.13437	239
2018-04-13	0.386815	0.333907	-0.0283704	-0.131957	0.153692	-0.231957	-0.881298	-0.160529	-0.0514425	-0.0423212	0.000641803	0.137918	-0.536099	0.0604542	1.30645	240
2018-04-16	-0.44785	-0.451082	-0.890417	-0.952141	-0.754575	-0.191711	0.148138	0.458529	0.578742	0.455585	-0.000448408	0.40488	0.308125	0.0603835	0.655556	241
2018-04-17	-0.597566	-0.304441	0.499076	0.390049	1.56917	0.167953	0.292654	-0.499467	-0.317751	-0.212869	-0.00085758	-0.641269	0.0663621	-0.334112	-0.00555417	242
2018-04-18	1.62966	0.252755	-0.60816	0.92721	0.109077	-0.331437	-0.48259	0.695502	0.699336	1.08651	0.000778371	0.704699	1.06896	1.36423	1.28557	243
2018-04-19	0.0342954	0.235964	0.780386	0.430453	0.98799	0.64793	0.240729	0.253166	1.25037	1.22212	0.00050544	-0.283613	0.816638	-0.199015	0.0738093	244
2018-04-20	1.87489	0.268224	0.959959	2.02004	0.677786	1.59939	1.0318	1.4435	1.37006	2.17664	0.00186634	-1.0166	-0.302494	-0.655619	-0.204251	245
2018-04-23	1.91447	1.6313	1.17746	1.02127	0.71935	1.14644	1.21862	0.163788	0.687269	-0.775823	-3.96044e-05	-1.07462	-0.606525	-0.86123	-2.04726	246
2018-04-24	-0.403057	0.635883	-0.17087	-0.274756	0.630177	0.314821	-0.716052	1.60612	1.43331	0.685544	-0.000311719	0.321251	-1.17749	-0.0715927	-0.595902	247
2018-04-25	0.870016	0.456772	0.861492	0.43813	0.541761	0.787343	1.14797	-1.90554	-2.21022	-1.99701	-0.00167343	-0.646236	-0.122866	-0.204717	0.0368961	248
2018-04-26	-0.0752703	-0.0740452	1.16955	0.183792	1.14503	-0.0324233	0.588603	0.963307	1.14628	0.838399	-0.000175845	-0.131657	0.0148976	-0.272225	0.290375	249
2018-04-27	-0.0934519	-0.315333	0.0965869	1.82654	0.107169	-0.135088	-0.0941517	-0.894688	-0.504637	-0.674237	0.000641463	0.0129405	-0.174777	-0.072175	0.33006	250
2018-04-30	-0.803069	0.231504	0.617791	0.444104	0.602038	0.460954	-0.00814309	0.693539	0.633028	0.345534	-0.000993194	-0.740945	-0.540023	-0.408361	-0.84979	251
2018-05-01	0.9974	0.631894	1.34246	1.82386	0.943129	1.12468	-0.00814309	-0.463419	-0.00304031	0.0282304	0.00105016	-0.561419	-0.474497	-0.411042	-0.477389	252
2018-05-02	-0.456717	0.294113	0.586989	0.0182903	0.469867	-0.281272	1.62255	0.358234	0.38367	0.352977	-0.00194726	-0.295625	0.330715	-0.141115	0.678972	253
2018-05-03	0.542079	-1.35749	-0.0294075	0.541411	0.0850005	-0.260135	-0.522307	1.13577	2.04423	0.300772	-0.00427323	0.85123	0.380617	0.333854	0.121534	254
2018-05-04	-0.547421	0.135132	0.442911	0.451099	0.596571	-0.445375	0.386114	-0.144228	0.101149	0.106114	0.00228369	-0.52318	-0.193204	-0.0729174	-0.345334	255
2018-05-08	2.15074	-0.0258433	1.52157	0.18915	0.255015	1.83368	0.568188	-1.25532	-0.835391	-1.32635	0.00255234	-0.286844	0.0846915	0.668095	0.334225	256
2018-05-09	-2.08337	0.808856	0.208429	-0.598354	0.573179	-0.241173	-0.607318	0.244362	0.037381	-0.301409	-0.0001759	0.550876	-0.0369208	0.128533	0.205389	257
2018-05-10	-1.18697	-0.266215	-0.798127	1.05627	-0.106365	-1.23598	-0.837204	-0.761529	-0.650937	-0.730431	-0.00140331	0.357338	0.533419	0.659293	0.620853	258
2018-05-11	-0.112294	-0.459343	-0.995205	-0.809863	-0.829746	-0.610039	-0.621148	-1.62564	-1.18641	-1.39066	0.000233245	0.405268	0.528114	0.192711	0.529709	259
2018-05-14	-0.368454	0.39162	-0.447082	-0.597109	-0.405678	-0.217608	0.146638	0.641622	1.18228	0.928639	0.000914939	-0.424716	-0.412667	-0.335537	0.0353324	260
2018-05-15	1.94764	1.14099	2.04814	1.09355	0.490185	1.57931	2.27722	-0.561324	-0.531772	-0.821949	9.67044e-05	-2.12805	-0.831383	-1.34458	-1.46137	261
2018-05-16	-0.729853	-0.0736429	1.40303	0.452982	0.148741	-0.571686	-0.315828	-0.400826	-0.0137894	0.399656	0.00145889	-0.369729	-0.561406	-0.481049	0.708005	262
2018-05-17	-0.239493	0.832566	-0.177322	-0.376742	0.233768	-0.0946421	-0.356027	-0.812997	-0.948215	-0.891616	-0.000584322	-0.201209	0.43524	-0.27881	0.160556	263
2018-05-18	1.39656	-0.10515	0.430824	0.413581	-0.917064	-0.0739224	0.692987	0.44784	0.565404	0.279236	-0.00385874	-0.154796	-0.00213879	-0.417905	-0.422095	264
2018-05-21	-1.03766	0.560177	0.13608	0.771768	0.191801	-1.12444	0.259411	0.370614	0.0532984	-0.0816007	0.000779682	-0.0489268	-0.194	0.0637226	-0.131345	265
2018-05-22	-1.09711	-0.247351	-0.26984	-0.352014	-1.13499	-0.626543	-0.891252	-1.12711	-1.40221	-0.782017	0.000369854	0.344344	0.812939	1.4254	0.949137	266
2018-05-23	1.94551	-1.44057	1.67261	1.38526	0.621104	1.2405	1.21624	-1.4654	-1.81012	-1.04977	0.00132437	-0.39561	-0.191998	-0.207584	-1.21299	267
2018-05-24	0.450179	-1.22694	-0.660927	-0.566653	-0.750997	-0.690651	-0.679618	0.186957	0.674025	0.797096	-0.00031229	1.28095	-0.0886806	0.398755	-0.00555417	268
2018-05-25	1.17065	0.0544859	1.17693	0.843741	-0.0649984	0.172947	0.822483	-0.390208	-0.513621	-0.534259	0.000233081	-0.166161	0.531085	-0.072396	0.247189	269
2018-05-29	0.985552	-1.20231	2.15906	0.847716	0.278675	0.894893	1.46071	-0.0800595	-0.573296	-0.166725	-0.00208608	-0.725191	-0.691368	-0.274582	0.162081	270
2018-05-30	-3.34345	0.651992	-2.10803	-0.503409	-0.710098	-1.24708	0.0654266	-0.252481	-0.295896	-0.152286	0.000506423	0.384125	-0.384603	0.129568	-0.131217	271
2018-05-31	2.31387	-0.525897	-0.104829	0.0988209	-0.972124	0.0701627	-0.45545	0.255527	0.554194	0.352059	-0.000722172	0.336395	0.60481	0.0620487	0.287062	272
2018-06-01	-0.399195	1.19757	-0.160583	-0.915133	0.51806	0.0702061	0.467456	0.0331013	0.00864332	0.189609	0.000779436	-0.955873	-0.469806	-0.27488	0.202188	273
2018-06-04	-0.47216	0.246653	-0.3091	0.591582	0.387634	-1.68601	-0.744454	-0.12868	0.314785	0.696921	-3.96044e-05	0.0184861	0.0499414	0.197088	0.733737	274
2018-06-05	1.54667	-0.0739001	0.453136	-0.607722	-0.496914	0.843349	-0.0535033	0.323383	0.452857	0.370248	0.000642554	-0.340044	-0.210889	-0.61428	-1.03598	275
2018-06-06	-1.8233	0.565941	-1.95713	-0.910254	-0.324995	-1.45488	-1.09849	0.035468	-0.100072	-0.0804217	-0.00290697	0.624852	0.535266	0.266184	0.984147	276
2018-06-07	1.45856	-0.153628	-0.674503	0.0317025	-0.455642	0.941849	0.219283	0.0562321	-0.0792682	0.059304	0.00200913	-0.292725	0.666475	0.264982	0.761389	277
2018-06-08	-0.578855	-0.77846	0.780535	0.283402	0.843475	0.579526	0.7924	-0.270025	-0.173033	-0.13116	0.000369772	0.0309532	-0.104864	-0.275477	-0.48827	278
2018-06-11	0.429601	0.758729	-0.527581	0.270561	-0.238457	-0.31806	-0.183998	-2.30861	-2.05761	-1.56009	0.0018692	0.0602912	0.116868	0.332353	0.155982	279
2018-06-12	0.123258	0.420915	0.191047	-0.392611	-0.130518	0.171757	-0.0535388	-1.13436	-1.24013	-0.971063	0.000913795	-0.132989	0.303154	0.0620487	0.235566	280
2018-06-13	-0.434709	0.276668	0.154329	0.509319	0.0858725	0.0493812	-0.280636	-0.899951	-0.665091	-0.721017	0.0152594	-0.263511	0.14956	-0.477889	-0.489218	281
2018-06-14	1.91737	0.0218741	2.78999	0.604032	2.13107	1.83726	0.196246	1.09869	1.4264	0.623321	-0.0158833	0.501281	0.71867	0.601764	-0.127365	282
2018-06-15	1.72439	0.196667	0.343274	0.672941	0.449027	1.21239	2.2495	-0.856787	-1.08482	-0.593292	-0.000448286	-1.52949	0.31287	-0.747976	-0.620088	283
2018-06-18	1.09457	-0.248353	0.193997	0.487541	-0.192987	0.739901	-0.00814309	0.998012	0.968225	0.0940337	-0.000993671	-0.367875	-2.11253	-0.963807	-0.378737	284
2018-06-19	0.596862	-0.695069	0.550406	1.01426	-0.000459111	0.680464	2.37007	0.0572894	0.611844	0.235738	0.000233054	-0.514106	-0.885693	-0.90903	-0.172508	285
2018-06-20	0.489909	0.165624	-0.274403	-0.547081	0.12795	-0.0329045	-0.507231	-0.00754574	-0.0923515	-0.252015	-0.000994148	-0.220094	-0.26445	-0.28605	-0.425933	286
2018-06-21	0.488872	-0.169424	-0.142982	-0.505139	-0.729214	0.261675	1.03971	-0.173554	-0.357752	-0.171495	0.000642281	-0.745004	-0.15997	-0.0756507	-0.43028	287
2018-06-22	-0.0202081	-0.137599	-0.554223	-0.0886233	-0.387393	-1.06138	0.701781	-2.39091	-2.18658	-1.38375	0.00214014	0.205178	0.609588	0.0651553	-0.262514	288
2018-06-25	-0.0903771	-0.601712	-1.18533	-0.195721	-0.582247	0.365126	1.84675	0.675297	-0.171377	-0.0696162	-0.00140154	-0.0918756	-0.193628	0.0650741	-0.307387	289
2018-06-26	-0.353826	0.454178	0.360154	0.407368	0.602626	0.0720243	2.20198	-0.679199	-1.10488	-0.818434	-0.000857417	-0.778324	-0.544972	-0.287023	-0.440628	290
2018-06-27	0.120293	0.64399	1.63183	1.40639	1.32929	0.597779	1.27628	0.214227	0.421697	0.51259	0.000505658	-0.547995	-0.0723671	-0.28833	0.299481	291
2018-06-28	-0.829533	0.0378174	0.119408	0.601371	0.38414	0.367737	1.32659	-1.05293	-0.843835	-0.721844	0.0148703	-0.318866	-0.372867	-0.575385	-0.0489922	292
2018-06-29	-2.00272	0.498479	-1.76777	-1.37368	-1.19927	-0.938195	-0.359202	1.16227	0.518942	0.190984	-0.0152221	-0.149149	-0.303788	-0.076891	0.34067	293
2018-07-02	1.29135	0.00588358	1.36929	0.869183	0.535574	1.61282	2.51303	1.35763	1.45185	0.948772	-0.00140344	-0.284749	-0.197924	-0.871594	-0.525991	294
2018-07-03	-1.11901	-0.32748	-0.908534	-0.548718	-0.493682	-1.34244	-1.44979	-0.409207	-0.526482	-0.161481	0.00036969	0.291852	-0.198483	-0.0780017	0.557956	295
2018-07-05	-0.518338	0.053585	-0.811849	-0.721736	0.0638792	-0.0749555	-0.155908	0.0620472	0.204274	-0.231621	9.67999e-05	0.273377	0.0520778	0.538304	-0.308022	296
2018-07-06	-0.555163	-0.200633	-0.753258	-0.450968	-0.473309	-0.704035	0.292796	0.19019	0.0183009	-0.0298958	-0.000721763	-0.0662062	0.141296	-0.548799	-0.00555417	297
2018-07-09	0.371741	0.450447	-0.104125	0.811085	0.429326	-0.950784	-1.50435	0.115039	0.0248998	-0.137144	0.000506149	0.527903	0.725162	0.790313	0.767765	298
2018-07-10	0.157608	0.701969	0.303071	-0.854212	0.149746	0.0297298	0.940719	-1.28407	-1.47375	-0.885637	0.00105125	-0.751686	-0.996772	-0.437903	-0.648971	299
2018-07-11	0.121914	0.415701	0.118064	0.340459	0.149668	1.32552	2.54637	0.236528	0.475353	0.150336	0.00281974	-0.279731	-0.0733455	-0.368153	-0.440168	300
2018-07-12	0.548266	1.37031	0.563601	0.0455026	1.66601	-0.389189	-0.737728	-0.537557	-0.611934	-0.404169	-0.0039898	-0.533997	-0.289255	-0.00524772	-0.0930315	301
2018-07-13	0.174774	-0.0727243	0.471909	0.300823	0.424924	0.155701	1.46042	-0.122987	0.0452249	-0.0403763	0.00377457	-0.421777	-0.127795	-0.51697	0.256321	302
2018-07-16	-0.659891	-0.166561	-0.792317	-0.263506	-1.12921	-0.137581	-0.192747	1.66498	1.6926	1.26311	-0.00426307	-0.105924	-0.0195589	-0.373409	-0.486941	303
2018-07-17	1.18608	0.754502	0.861973	1.01511	0.405023	0.491541	0.816417	1.82442	0.654303	0.645377	9.68409e-05	-0.78565	-0.164194	-0.0791474	-0.805656	304
2018-07-18	0.0857996	0.0208674	0.361063	1.51046	0.0635785	-0.011879	0.765889	0.135953	-0.71252	-0.527617	-0.000312509	-0.790599	-1.22698	-1.12462	-0.230599	305
2018-07-19	1.19721	0.22307	0.773127	0.865254	0.489341	1.25386	2.89999	0.23065	-0.4045	-0.339911	0.00132437	-0.67451	-0.689078	-0.915775	-1.10327	306
2018-07-20	-2.05325	-1.96422	-1.93148	-1.72422	-1.51583	-1.65533	-0.233498	-0.464755	-0.765704	-0.960604	-0.00222262	0.946408	0.390524	1.95067	0.271639	307
2018-07-23	-0.091464	-0.624168	0.118254	0.12724	-0.343527	0.555043	1.42744	1.08235	0.0111713	-0.0112038	-0.000585905	-0.391279	0.406038	0.363805	0.36115	308
2018-07-24	0.263608	-0.167851	0.341318	-0.401132	0.385419	-0.704503	-0.088343	1.83639	1.02374	0.352478	0.000370142	0.24941	0.0725438	0.726226	1.07531	309
2018-07-25	-1.08743	-0.420912	0.137087	-0.197602	-0.0219008	0.0719111	-1.36889	-0.676001	-0.309177	0.00942381	-3.96044e-05	0.226416	0.182546	0.14	0.436545	310
2018-07-26	-0.430848	0.258696	0.435221	0.42468	-0.0647736	0.575921	1.1012	-0.703642	-0.365519	-0.31679	0.0011889	-0.34163	-0.129709	-0.442034	-0.137685	311
2018-07-27	-0.413745	-0.436993	-0.104925	0.01878	0.0638101	-0.557767	1.23116	0.64026	0.235942	0.136265	0.00091513	-0.436002	-0.68496	-0.445184	-0.0496924	312
2018-07-30	-0.791096	0.0374732	-1.07107	-0.292564	-1.16097	0.0300443	0.0185196	-0.0782947	-0.524236	-0.297464	-0.00331577	-0.0665424	0.480218	-0.226411	-0.0939732	313
2018-07-31	0.0691143	1.39277	0.229482	0.208222	0.236328	-0.639544	-0.349573	-1.30214	-0.981755	-0.361554	0.00105333	-0.307678	-0.241142	0.362914	-0.00555417	314
2018-08-01	-0.200133	-0.277206	0.750504	0.0729475	0.622861	0.741623	0.610462	-0.406947	-0.473495	0.324152	0.00187092	-0.227648	0.146709	-0.447309	-0.0498352	315
2018-08-02	-0.0385909	-0.403563	1.01482	1.16035	0.449846	0.471446	1.19405	-0.258217	-0.407749	-0.525884	-0.00140399	-0.371532	-0.11187	-0.153316	-0.272247	316
2018-08-03	-0.524134	-0.593951	0.287706	0.196209	-0.343564	-0.579108	-0.385395	-0.397007	0.233394	0.289132	0.00077919	0.0231503	-0.353121	0.658249	-0.0501719	317
2018-08-06	0.393029	0.46347	0.625961	1.0181	0.813494	0.260972	1.00583	-1.52264	-0.52885	-0.893469	-0.00222415	-0.651634	-0.0753425	-0.520676	-0.680703	318
2018-08-07	0.356475	-0.404547	-0.612174	-0.131979	-0.38567	-0.74539	-1.17632	-0.761825	-1.19443	-1.18768	0.00309958	0.190221	0.425191	0.729752	0.669594	319
2018-08-08	0.785512	-0.389536	-0.0118382	1.06451	-0.000476333	0.155475	0.332077	-1.55932	-1.07512	-1.77378	0.000505604	-0.305572	-0.464309	-0.814236	-0.908241	320
2018-08-09	-0.271071	-0.120844	0.607124	0.143265	-0.773199	0.533272	-0.779412	0.834786	0.335613	0.447331	-0.00167588	0.379181	0.480542	0.949684	-0.0969238	321
2018-08-10	1.42525	-0.406359	3.16654	1.4054	1.05062	2.01773	1.36835	-1.40489	-1.55402	-1.03196	0.00173294	-0.0486688	-0.408147	-0.664759	0.584747	322
2018-08-13	0.210766	-0.041716	0.0640763	0.172326	-0.40748	0.58512	2.22353	0.318823	-2.63956	-2.02061	-0.000448449	-1.32348	-0.729512	-1.04554	-0.276947	323
2018-08-14	-0.554448	0.402218	0.866442	0.270118	-0.0648426	0.63032	-0.382656	-0.282899	-0.379755	-0.104453	0.00200339	-0.358245	-0.586352	-0.607763	-0.507814	324
2018-08-15	0.851141	-0.501531	0.370838	0.746216	0.278208	0.13835	2.7311	0.187969	0.142805	0.325865	-0.000584105	-1.42975	-0.822643	-2.39788	-2.12671	325
2018-08-16	-0.198061	0.402334	-1.06404	-0.512383	0.449027	-0.932429	-2.83712	0.125946	0.300109	0.497449	-0.00249255	-0.20103	-0.873179	0.465224	1.70004	326
2018-08-17	-1.14274	-0.581088	-0.412389	-0.176275	-0.27862	-0.139895	-0.282747	0.898592	1.64205	3.04304	0.000778535	-0.238278	0.195046	-0.161669	0.455918	327
2018-08-20	0.0865976	-0.280255	-0.525571	-0.412925	-0.0861442	-0.5654	-1.03446	-1.1357	-2.64994	-2.08642	0.000914271	0.496634	0.349232	1.00439	1.21513	328
2018-08-21	-0.664066	0.133207	-1.80886	-1.31248	-1.41928	-0.944135	-0.548921	0.696412	0.56356	0.757547	-0.00181162	0.553474	0.0964082	0.225392	-0.453439	329
2018-08-22	-0.612095	0.0695181	-1.13903	-0.684395	-0.843556	-0.011879	-0.241668	-0.474828	-0.705944	-0.679978	0.000505876	0.468051	0.0769008	0.224524	0.486851	330
2018-08-23	0.767806	0.924933	0.53214	1.10993	0.280665	1.85826	1.83474	0.507574	0.352769	0.31102	0.00064194	-0.446129	-0.73725	-1.20183	-0.363081	331
2018-08-24	-0.62961	0.100539	-1.07971	-0.382191	-0.49881	-1.45896	-3.82073	0.485931	0.278099	-0.0017669	-0.000993862	0.435545	-0.0390817	0.267006	0.750504	332
2018-08-28	-1.74904	-0.310331	-1.76123	-0.381348	-1.54597	-0.434938	-0.0722045	1.22436	0.799917	0.927997	-0.00126749	1.26498	1.06357	1.45187	0.909585	333
2018-08-29	0.28629	1.17221	0.396506	-1.64208	-0.416363	1.26077	0.908992	-0.193758	-0.445983	-0.269192	9.68818e-05	-0.780477	-0.829971	-0.921473	-0.135046	334
2018-08-30	0.898035	-1.01838	0.993318	0.128254	-0.483072	0.628379	1.18811	-0.162559	-0.293351	-0.41651	0.000642622	-0.680456	-0.116807	-0.0822247	1.27136	335
2018-08-31	1.44914	-0.326285	0.941607	0.457038	-0.220528	1.4924	-0.61907	0.0768041	-0.153004	-0.02188	0.00105125	0.415374	-0.0585047	-0.00524772	-0.0474844	336
2018-09-04	1.95459	0.70066	0.569658	1.81018	1.22559	0.377302	0.666473	1.01036	0.158121	-0.19786	-0.00427153	-1.11136	-1.61961	-1.56554	-0.512084	337
2018-09-05	0.156745	0.0214332	-1.00503	-0.961523	-0.7887	-0.336265	-0.842301	-2.16936	-3.72575	-2.28837	-0.000586618	0.481778	-0.340992	0.15259	0.876815	338
2018-09-06	0.368877	-0.973798	-0.0678766	-0.407486	-0.725776	-0.206186	0.268351	-0.698794	0.027915	1.00878	0.00228369	0.714932	0.361942	1.24296	-0.423367	339
2018-09-07	-0.746358	0.464572	0.980923	-0.00850787	0.0649434	1.3534	0.507062	-0.474475	-1.0871	-0.689646	0.00227973	-0.62076	-0.340653	-1.09603	0.162081	340
2018-09-10	-0.197838	-0.168081	-0.593025	-1.2544	1.2492	0.358595	0.660003	-0.294815	-1.54131	-0.86899	-0.00276865	-0.262784	0.101063	1.6237	0.493285	341
2018-09-11	-0.500197	0.684196	0.250411	0.155372	-0.0446739	0.228311	0.833243	-0.14583	-1.08305	-0.350679	0.000779682	-0.670689	-0.382193	-0.969609	-0.924772	342
2018-09-12	-2.25475	-0.419955	-0.648109	-0.185831	-0.70221	-1.18745	-0.695923	0.104928	-0.223103	0.314921	-0.000449186	0.473097	0.101575	0.266314	0.289162	343
2018-09-13	-0.00267079	0.96563	-0.850975	-1.01484	-0.506532	-0.682744	-0.893592	0.452254	2.35495	0.421017	0.00159799	1.2357	0.262092	1.67457	0.120108	344
2018-09-14	0.427974	0.240741	0.304899	0.276681	-0.309392	0.290733	1.4012	-0.0475644	-0.113983	-0.17084	0.000369486	-0.763789	-0.0597097	-0.382984	0.203032	345
2018-09-17	-0.217894	-0.213978	-0.57012	-0.834909	-0.973154	-0.184873	-0.712129	-0.859707	-1.16687	-0.299455	-0.00072149	-0.0577045	-0.200588	-0.30913	-0.214141	346
2018-09-18	-0.721516	0.491044	-0.104609	-0.156917	0.020946	-0.744959	0.261968	0.267813	1.02533	2.18621	-3.96044e-05	-0.207675	0.141384	0.976885	0.69936	347
2018-09-19	-0.687629	-0.166662	0.155578	-0.0487843	1.12522	-1.14776	-0.670537	0.11872	0.0240497	0.253507	0.0121824	0.228429	-0.120095	0.21917	1.04968	348
2018-09-20	-0.382064	0.552356	-1.08726	-1.00456	-0.994771	-0.0759267	-0.0664916	0.290794	1.10093	4.23752	-0.0121252	0.404009	0.161279	0.663095	0.984147	349
2018-09-21	-0.111182	0.036551	0.0994057	2.3024	-0.666301	-0.0545628	0.543141	0.880667	1.63612	2.95763	-0.00126773	-0.928443	0.380264	0.215916	-0.201596	350
2018-09-24	0.394958	-0.0258433	-0.621411	-0.822463	0.61964	0.308536	-0.00814309	-0.6585	-1.43571	-1.82222	0.000779272	0.315037	-0.0793542	0.0682956	0.50222	351
2018-09-25	0.177846	0.37918	0.0622595	-0.454438	0.595881	0.24493	0.378317	-0.524696	-0.705367	0.842902	-3.96044e-05	-0.130337	-0.119357	-0.226144	0.265285	352
2018-09-26	0.339927	0.0363852	0.228498	-0.264607	0.792454	-0.204525	0.684338	0.0288904	-0.395492	-0.364308	-0.00195108	-0.750193	0.714849	-0.226947	-0.00555417	353
2018-09-27	1.30897	0.688203	1.63893	1.05994	2.10106	0.889188	0.609218	0.696972	1.08611	0.741747	9.70187e-05	-0.865123	-0.236911	-0.900191	0.0715014	354
2018-09-28	-2.05423	0.129001	0.902292	0.698246	-0.371625	-0.441611	-1.0641	-0.227833	-0.581371	-0.113141	0.000779847	0.117068	-0.476715	0.219722	1.02079	355
2018-10-01	-2.2366	0.715514	1.03743	0.291379	1.80349	0.310308	-0.00814309	-0.143642	0.706339	0.86851	-0.00441571	0.139751	0.950012	0.144272	-1.57435	356
2018-10-02	0.289133	-0.488825	0.138404	0.661015	0.107519	0.505015	-0.00814309	-0.247323	-0.467126	-1.49516	-0.00442981	1.34669	-0.196413	0.810626	0.266566	357
2018-10-03	0.197733	0.791266	0.665642	-0.117911	1.10015	1.30969	-0.00814309	-0.193671	-0.433023	0.264835	0.00270593	-0.370773	0.878663	0.288749	-0.394852	358
2018-10-04	1.39536	-0.642178	0.327579	-0.281771	0.687318	1.29909	-0.00814309	0.209178	0.123053	-0.0242054	-3.96044e-05	0.15112	-0.427864	-0.152069	0.383744	359
2018-10-05	0.810504	-0.381217	0.12019	-1.17887	-0.0434506	0.647778	-0.00814309	0.134302	0.396135	-0.227244	-0.00237296	-0.0214203	-4.94431e-05	-0.447844	0.0331734	360
2018-10-09	0.195675	-0.692173	0.384975	-0.509496	0.14972	-0.978419	2.82018	-0.011162	-0.0393819	-1.07009	-0.00375375	-1.72077	-1.24193	-0.302106	0.57102	361
2018-10-10	0.465479	-0.679127	-1.10656	-0.8987	-0.408603	-0.186969	0.0285801	-0.160224	-0.17656	-0.472627	-0.00888413	0.227312	0.179377	-0.00524772	-0.0437416	362
2018-10-11	0.930823	-0.728497	-0.444409	0.180264	0.278779	-0.274145	-1.81723	-1.36108	-2.88442	-2.65844	-0.000733006	1.49255	0.0796496	0.29161	0.298956	363
2018-10-12	-0.253629	-0.401744	0.119632	0.531362	-0.0649637	-0.0992025	1.58055	0.13493	0.469675	1.24612	-0.00128862	1.22513	0.767964	1.02252	0.0323513	364
2018-10-15	-1.02722	-0.33971	-0.64992	-0.183813	-1.01268	-0.578288	-0.275945	1.34835	1.40023	1.15766	-0.034915	0.855896	0.525314	0.502217	-0.00555417	365
2018-10-16	-0.561776	0.507397	0.0256324	-0.560702	0.58145	0.0316177	-0.160511	-0.032064	0.0296795	0.635175	-0.00374812	0.0133814	0.0385131	-0.222216	-0.00555417	366
2018-10-17	0.898452	0.052438	1.00236	0.990041	0.708779	0.205787	0.836955	-0.112398	-0.157919	-0.0395027	0.00480796	-0.199615	-0.427309	-0.295744	-0.157387	367
2018-10-18	1.32464	-0.182441	0.874595	1.03634	0.321176	0.249724	0.536715	-0.427547	-0.581802	-0.479882	0.010028	-0.591841	-0.548125	-0.7376	-0.196137	368
2018-10-19	0.747327	0.615321	-0.351925	0.223073	0.620139	-0.31704	-0.406228	-0.261319	-0.163893	-0.223499	0.0173669	0.378881	0.352904	0.50832	0.412568	369
2018-10-22	0.0508085	0.379539	0.876634	0.975134	-0.0859293	0.993052	0.803279	0.0987292	0.113749	-0.0103298	-0.00507024	-0.547706	0.0585457	-0.37164	0.706779	370
2018-10-23	-0.05615	-1.05672	-0.239255	-0.104317	-0.407092	0.25135	-0.390071	-0.142402	-0.121351	0.202837	0.00610643	1.15915	0.311199	0.0682071	1.31116	371
2018-10-24	-1.91815	0.693288	1.73582	1.15889	0.854825	0.0320359	0.237802	-0.0434981	-0.0784647	-0.186507	0.000796348	-0.53115	0.0967232	-0.299599	-0.585555	372
2018-10-25	1.28798	-0.0882596	0.293208	0.986219	0.596341	-0.275182	0.289907	-0.131137	-0.115496	-0.0394207	-0.00115432	-0.0309881	-0.0389228	0.36247	-0.742266	373
2018-10-26	0.604331	-1.42038	-0.260344	0.0190884	-0.597132	-0.0995476	-0.280039	-0.0400599	0.00576903	0.0376509	0.00218892	0.217013	-0.21356	-0.520676	-0.454009	374
2018-10-29	0.513822	1.29064	-0.0312562	0.268692	0.575168	0.295178	0.932168	-0.656139	-0.661234	-0.637415	0.0104964	-0.32334	-0.175236	0.875695	0.849727	375
2018-10-30	0.0684801	0.395224	0.503368	1.06299	0.87079	-0.843911	0.294328	-0.08297	-0.00388484	0.0626932	0.00877009	-0.533154	-0.90324	-0.0781757	-1.27627	376
2018-10-31	-0.0738217	0.129852	0.619501	-0.663557	0.25406	0.46928	0.377403	0.0905341	0.0687948	0.159093	-0.00196187	-0.988072	-0.356986	-0.151366	-0.00555417	377
2018-11-01	-0.376569	-0.134815	-1.2166	-2.68614	-0.487995	-2.16545	-2.78906	0.070204	-0.0682549	0.166019	-0.00113926	1.39277	0.416733	1.29738	0.334655	378
2018-11-02	-0.00267079	0.440705	0.350305	0.128557	0.0846302	-0.22776	-1.64375	0.0335943	0.342683	-0.00140767	-0.00237932	0.0310377	1.42397	0.989022	0.851279	379
2018-11-05	-0.180928	0.175943	-0.298387	-0.747081	0.423838	0.00969563	1.85827	0.0704807	0.616826	1.07528	0.00271258	-0.0398744	-0.347967	-0.216946	0.434492	380
2018-11-06	0.60285	0.222192	-0.336035	-0.757502	-0.254635	-0.507339	-0.412157	0.0975386	0.710184	1.2972	-0.000314573	-0.110761	-0.155337	0.767412	0.103725	381
2018-11-07	-0.429934	-0.118815	-0.885989	-0.916565	-0.914442	-1.31832	0.00235646	0.162355	-0.141184	-0.366767	-0.000452162	-0.199508	-0.136197	-0.0750865	0.157821	382
2018-11-08	0.122028	0.824564	0.823643	0.384218	0.765339	-0.0971645	0.747028	-0.361654	-0.49323	-1.14701	-0.00169108	-0.56915	-0.724438	-0.496371	-0.571048	383
2018-11-09	2.03649	-0.180157	1.74556	1.88499	0.635764	1.27235	1.22089	-0.26425	-0.149695	0.174267	-0.00376276	-1.19609	-0.61368	-0.571416	0.141127	384
2018-11-13	-0.126286	0.282648	0.717821	-0.719055	0.465054	0.11713	-0.0446926	0.00925075	-0.108257	0.296377	-0.0248427	-0.894442	-1.30806	-1.08119	-0.373243	385
2018-11-14	0.244494	-0.442435	-0.454513	0.278203	-0.317338	0.00963287	-0.248417	-2.17816	-1.97061	-0.997467	-0.0265923	0.0512178	-0.223541	-0.586937	0.398724	386
2018-11-15	-0.780357	-0.396979	-0.223443	3.62041	-0.169575	-1.08384	-0.635694	-0.525312	-0.335871	0.173705	0.0283399	0.724278	0.630634	-0.151541	0.249657	387
2018-11-16	-0.339292	-1.11282	-1.48437	-1.24493	-0.955499	-0.927884	-0.0761929	-0.374157	-0.690917	-0.323781	0.00822072	0.893057	0.603333	0.650326	1.703	388
2018-11-19	0.227701	-0.368859	-0.867794	-0.0362881	-1.55931	0.434797	0.154108	-3.23594	-2.79404	0.111547	-0.0180243	-0.124628	0.279418	0.139484	-0.215277	389
2018-11-20	1.02238	0.161339	1.09127	0.462499	0.149512	0.949632	0.2534	-1.74876	-2.07204	-1.1475	-0.0094065	0.0718691	0.297633	0.0669894	-0.605651	390
2018-11-21	0.508174	0.596662	-0.0312462	0.463678	0.192247	-0.461325	-1.05545	0.503395	0.561724	0.247701	0.0238179	0.223186	-0.098692	0.0669039	-0.11237	391
2018-11-23	-0.848814	-0.383514	1.17319	-0.383827	0.534025	0.888318	1.19077	-1.23496	-1.70513	-1.21782	-0.00438468	-0.27151	-0.676626	-0.584864	-0.399606	392
2018-11-26	0.191508	1.1378	-0.0697765	-0.0641525	0.191698	-0.119319	-0.426528	-3.08415	-2.11451	-1.78583	-0.00750051	-0.0754682	0.478912	0.212754	0.10229	393
2018-11-27	1.33454	0.37576	1.06349	1.11866	0.319433	0.504514	0.519988	0.11997	0.133854	0.0799487	0.00812306	-0.249643	-0.437981	0.139655	-0.0414708	394
2018-11-28	0.260349	0.159203	-0.0893731	-0.510596	-0.0642933	-0.5927	0.179916	2.13263	1.62491	0.935442	0.0245726	-0.766131	-0.521712	-0.879875	1.33767	395
2018-11-29	-0.880559	-0.860091	-1.83321	-0.314664	-0.576686	-1.74142	-0.60923	0.111207	-0.71409	-0.409042	-0.00031524	1.11029	0.442584	-0.818157	-0.249711	396
2018-11-30	0.0676818	0.159888	1.13594	0.241623	0.469327	0.0518358	0.718263	-1.42051	-0.623229	-0.632209	-0.00445738	-0.830408	-0.139758	-1.13151	1.06486	397
2018-12-03	-1.62617	-0.0258433	-0.625331	0.423161	-0.235156	-1.0493	-3.99772	-0.845305	-0.8029	-0.638819	0.00506715	1.08402	0.578921	-0.0810765	0.266213	398
2018-12-04	0.209731	-0.972021	0.217431	0.326311	0.020946	0.1359	-2.41779	0.29325	0.186329	0.16164	-0.00210761	0.830531	0.61198	-0.00524772	0.997849	399
2018-12-06	3.77048	-0.758358	-0.547719	-0.803333	-1.02801	2.90904	2.4965	-2.73263	-3.24998	-1.81067	-0.00959304	0.144686	-0.670946	-1.2315	-0.738977	400
2018-12-07	-2.01328	0.192672	-0.298495	0.395116	-0.236731	0.117309	-0.446399	-0.604644	0.405931	-0.33907	0.0166695	0.0127068	0.395819	0.0721197	-0.445178	401
2018-12-10	1.4502	0.534809	0.426914	2.68786	-0.366155	0.419524	1.80481	0.197129	-0.599231	-0.0507109	0.00543933	0.126679	0.157539	-0.237645	0.869037	402
2018-12-11	0.398339	0.672465	1.04131	0.487043	0.772998	-0.313987	-0.581616	-0.392146	-0.380176	0.00350375	-0.00593035	-0.0575462	0.411049	-0.00524772	0.72021	403
2018-12-12	-1.26031	-0.227292	-0.912828	-1.88614	-0.215127	-0.420945	-1.00995	0.327479	0.212094	0.179664	0.00366221	-0.0137238	0.0389096	0.304419	0.125036	404
2018-12-13	0.224904	0.562358	0.0833888	0.328444	0.407112	-0.119349	0.09744	-1.03926	-0.663437	-0.303637	-0.00979562	-0.316363	0.0777557	0.302855	0.0595856	405
2018-12-14	0.66128	-0.505543	1.11911	0.921846	0.705739	1.10946	1.31958	-0.507639	-0.525351	-0.526784	0.00628916	-0.705117	-0.409817	-0.778442	-0.960345	406
2018-12-17	0.0496661	-0.631204	-0.741601	-0.503014	-0.749601	-0.141678	-0.471241	1.77754	1.95593	1.68786	0.00598662	0.502124	0.0587063	-0.16107	0.818853	407
2018-12-18	1.3193	-0.680112	-0.471558	-0.529678	-0.0648426	0.204514	-0.129278	0.826861	1.04855	0.846207	0.0088143	0.354887	0.195119	0.228336	0.254799	408
2018-12-19	-0.558378	-0.635568	-1.09907	-0.345806	-0.236627	-0.011879	-0.118779	0.0651615	-0.248926	-0.172639	0.00104614	0.706214	-0.0585313	0.459254	-0.429471	409
2018-12-20	1.40141	-1.299	-0.183222	0.271959	0.020946	1.46764	-0.451026	2.17909	2.35836	0.992988	0.00240017	0.35922	0.465694	-0.00524772	0.580249	410
2018-12-21	0.945928	-0.341629	0.577742	-0.429746	-0.064981	0.689273	1.11909	-1.31333	-1.00037	-0.717003	-0.00791679	-0.191898	-0.329645	-0.0824194	-0.953505	411
2018-12-27	1.37027	-0.595691	-0.183556	0.763628	-0.237043	1.13429	-2.11268	-1.62924	0.927505	-0.792903	0.00919112	0.798135	1.38172	0.225975	0.45481	412
2018-12-28	-0.362287	-0.724845	-0.620407	-1.00524	-1.3603	-0.54193	0.552148	1.59031	2.91719	1.35889	0.00563065	0.889743	0.883437	-0.391107	0.449707	413
2019-01-02	-0.654816	-1.81777	1.68374	1.42433	1.01462	0.961268	-0.84361	0.0198213	1.86058	-0.109196	-0.00598046	0.279194	0.51916	-0.23794	-0.102686	414
2019-01-03	-1.84882	-1.885	-0.795033	-0.487819	0.128675	-0.322179	0.579	-0.594684	-0.704556	-0.652315	-0.002613	0.587385	0.330659	0.690185	0.059226	415
2019-01-04	-1.47971	0.331346	-0.202646	-1.49367	-0.626248	-2.07942	-0.24606	0.0822182	0.629142	0.0189374	0.00158626	-0.949281	0.601834	0.454008	-0.00555417	416
2019-01-07	-1.78753	0.508583	-1.09462	-0.231751	-1.04039	-0.774728	-0.865936	0.995777	-0.35376	0.203648	9.57972e-05	0.99089	0.143802	1.72388	1.39435	417
2019-01-08	0.17292	-0.106712	0.462018	0.465549	0.020946	0.183925	0.0872673	-0.133573	-0.206891	0.0175931	-0.000175006	-0.539995	-0.419713	-0.228027	-0.130865	418
2019-01-09	-1.67614	-0.333486	-1.50649	-0.552573	-0.914803	-0.836932	-2.14497	-0.011151	0.0100787	0.100322	0.000501921	0.129123	-0.0926165	0.0691023	0.863697	419
2019-01-10	0.350635	-0.171757	0.138895	-0.0504515	1.10864	-0.401169	-1.30058	-2.24729	-2.86817	-1.53881	0.00428487	0.226035	0.290292	-0.00524772	-0.282955	420
2019-01-11	0.420592	0.055235	0.724874	-0.938743	0.281168	-0.313987	-1.50392	0.0285205	-0.0969267	-0.0180799	-0.00328168	-0.302716	-0.110517	0.0690118	-0.0364925	421
2019-01-15	0.279079	0.589131	1.65968	1.04667	1.23113	0.247035	-0.0135154	-0.329928	-0.790127	-0.196038	-0.00193438	0.407428	-0.311603	-1.50789	0.0253841	422
2019-01-16	-0.513593	0.167913	-0.298012	-1.39581	0.32242	0.16097	-0.346758	0.0534134	0.258872	0.112372	-0.00356548	-0.230409	-0.239576	-0.157568	0.516862	423
2019-01-17	0.93024	0.248279	0.42625	-1.06925	0.987091	0.269412	1.08182	0.186369	0.00985062	-0.0408365	0.00213124	-0.188401	0.108888	0.374842	1.40512	424
2019-01-18	-0.600713	1.22644	0.465299	0.582996	0.235051	-0.0335348	0.152658	-0.178195	-0.406321	-0.237822	-0.00207467	-0.604296	-0.405769	-0.30913	-0.510223	425
2019-01-22	1.24445	-0.747223	0.0642625	-0.778419	0.405794	0.834945	1.63331	-0.208103	-0.189375	-0.144074	-0.00302988	-0.231818	-0.799906	-0.617591	-1.15658	426
2019-01-23	0.504806	0.13472	-0.585187	-1.61976	-0.535168	-0.011879	-0.942915	-0.166116	-0.230964	-0.189765	0.00295067	-0.249169	0.446217	-0.236471	0.330967	427
2019-01-24	-0.352537	0.422954	1.30777	0.645262	0.42748	0.795809	-0.339897	0.0294529	-0.0514314	0.0492205	-0.0022137	0.278986	-0.335873	0.379638	-0.992283	428
2019-01-25	-1.46024	-0.218044	-1.61799	-2.01592	-0.728535	-1.66639	-2.08581	-0.0646187	-0.207424	-0.118345	-0.00153631	0.810788	0.259632	1.28549	0.459928	429
2019-01-28	0.173423	-0.668037	-0.582698	0.248182	-0.408516	0.118101	-0.0673723	-0.86937	-1.49964	-0.976501	-0.00167425	0.640653	1.12016	-0.0804224	0.332477	430
2019-01-29	-0.090701	0.231316	0.272963	0.167383	0.879006	0.356991	-0.725044	-0.231863	-0.19669	-0.272793	-0.00509213	0.398595	0.595923	0.369702	-0.00555417	431
2019-01-30	-1.32712	0.311108	0.121023	1.14445	0.832914	-1.02957	-1.02934	0.242044	0.553361	1.465	-0.0022303	0.209501	0.196096	-0.305023	0.0556083	432
2019-01-31	-0.872052	-1.19994	-0.676986	-0.985214	-1.04808	-1.85694	-0.858626	-0.197297	-0.314641	-0.548454	0.000234425	0.987096	0.551569	0.667188	1.08008	433
2019-02-01	-0.803943	1.11619	-0.372111	0.560831	0.0638101	0.45803	2.5212	0.147386	0.00957303	-0.135195	-0.00223338	-0.429165	-0.250891	0.29125	-0.364252	434
2019-02-04	0.567405	0.630276	0.68958	0.358466	0.748319	0.889188	-0.00814309	-0.0830278	0.110724	-0.362389	-0.010232	-0.596724	-0.972504	-0.674405	-0.186085	435
2019-02-05	0.086278	0.0220694	0.615532	1.65842	0.681981	-0.355759	-0.00814309	-0.0143825	-0.115294	-0.0149109	0.00410164	0.11725	0.413935	0.441672	0.444293	436
2019-02-06	1.06208	-0.409511	0.502671	-0.118263	0.106092	2.28065	-0.00814309	-0.465036	-0.465983	-0.479451	-0.000177443	-0.20278	-0.507472	-0.228298	0.0242611	437
2019-02-07	1.83148	-0.10588	0.446411	-0.131884	0.0422271	0.75258	-0.00814309	-0.0934525	-0.0455935	0.0559567	-3.96044e-05	-0.252972	-0.0921982	-1.05707	0.586252	438
2019-02-08	-0.336682	0.070196	0.600697	0.45812	-0.191961	0.0538215	-0.00814309	1.61333	2.16907	0.889351	0.00147586	0.35024	0.234275	-0.46164	-0.123235	439
2019-02-11	0.331341	0.995321	0.948809	0.983557	0.871299	0.536708	2.57323	-0.232596	0.255673	-0.451605	-0.00183079	-0.756968	-0.291567	-0.619132	-0.18271	440
2019-02-12	-0.917945	0.133179	-0.743125	-0.339862	0.61418	-0.648061	-0.977359	-0.0490835	0.151337	0.0837917	9.82624e-05	0.247237	0.360891	-0.392086	0.347997	441
2019-02-13	-0.390984	0.545447	0.545107	0.308881	0.126707	-0.427279	-0.695121	-0.17615	-0.0902649	-0.0718721	0.00120057	0.179911	-0.436375	0.149782	0.228467	442
2019-02-14	1.49407	-0.311256	0.0838904	1.00263	-0.169462	0.469212	0.598396	-0.166963	-0.205051	-0.161354	0.00147463	-0.165477	-0.43944	-0.471524	-0.151661	443
2019-02-15	-0.617816	-0.248152	0.315153	-0.881621	-0.000220887	-0.689352	-0.174438	0.0244467	0.0721794	0.00881311	-0.000177193	0.370526	0.327521	0.461029	0.977874	444
2019-02-19	-0.425423	0.196465	-1.14683	-2.45194	-0.933748	-0.534352	-0.652584	1.78161	2.78389	0.884654	0.00339595	1.39648	0.361617	1.74984	0.926945	445
2019-02-21	-0.992079	0.0376219	-0.184799	-0.321653	-0.149226	1.42917	-1.97538	0.0759934	0.171941	-0.135546	-0.00402565	-0.290704	0.448874	1.11276	0.300633	446
2019-02-22	-0.0735034	-0.0575729	-0.069736	-0.0899956	-0.234568	-1.27897	-0.456978	0.110632	0.217104	0.00860675	0.00367191	-0.233712	-0.163283	0.289459	0.0221681	447
2019-02-25	-0.0912418	0.56023	-0.0505608	0.11407	0.191322	-0.684901	-1.46119	-0.800123	-1.169	0.232059	0.00571386	0.110984	0.285424	1.66223	1.24986	448
2019-02-26	-0.144454	-0.516745	-0.547719	-2.60204	-0.0642252	-0.293248	0.729952	-0.186426	-0.227824	-0.47455	-0.00017631	-0.546348	-0.468629	-0.00524772	0.31573	449
2019-02-27	-0.535127	0.227697	0.0833081	-0.877668	0.042242	1.02957	-0.865777	-0.0252319	-0.214	-0.279972	-0.00209183	-0.234558	0.0885405	1.05819	0.471708	450
2019-02-28	0.370176	0.701052	-0.165	0.593346	-0.597504	0.751935	0.480631	-0.0386542	0.000658073	0.100991	-0.000176529	-0.358917	-0.181785	0.205233	-0.376278	451
2019-03-01	1.95826	0.776561	0.0641768	0.702794	0.298404	0.404342	0.729203	-0.0194554	-0.00187784	0.0460131	0.00105541	-0.650609	-0.947649	-0.568151	0.233152	452
2019-03-04	0.910333	-0.355801	0.925481	0.489769	0.170197	-0.0995971	-0.0243919	-0.67564	-1.2821	-0.605072	0.000644334	-2.28494	-1.50648	-1.36334	-0.191095	453
2019-03-05	0.400022	0.445336	0.544536	0.612766	1.1052	0.229465	0.0730938	0.779427	1.35183	0.517032	0.000643991	-0.189127	-0.208176	-0.295054	-0.675126	454
2019-03-06	1.61857	-0.528479	-0.377272	-0.0894088	-0.127547	1.08989	0.202988	-0.0169021	0.064926	0.0285733	-0.00113352	0.12101	-0.0762659	-0.883021	-0.30366	455
2019-03-07	-0.437383	-0.120248	2.05076	0.560281	1.45909	-0.210775	0.17041	0.0192222	-0.117009	-0.164958	-0.000860618	-0.0998656	-0.095256	-0.300668	0.588508	456
2019-03-08	0.101734	-0.798719	-0.55419	1.32534	-0.654616	-0.364845	0.364913	-0.103154	-0.414025	-0.251519	-0.00209431	0.914994	0.131735	-0.451078	-0.626825	457
2019-03-11	-0.141887	0.132163	0.335629	-1.15209	0.780803	-0.188062	0.0675026	-0.0250179	-0.140796	0.0736179	0.00133054	-0.390409	0.656345	-0.304289	0.319759	458
2019-03-12	-0.665085	0.242442	-0.958558	-0.0761765	-0.654349	-0.583096	-0.792381	0.0396972	0.0689839	-0.0282271	0.00105552	0.309334	0.537646	1.47551	0.690574	459
2019-03-13	-1.0875	-0.262544	-0.647171	-1.73611	-0.656496	-0.121488	-0.0406308	-0.170204	-0.263561	0.115259	0.00119136	0.776876	0.257017	0.794104	-0.0852772	460
2019-03-14	-0.0377494	0.730479	0.122174	-0.678526	-0.0214658	0.558934	0.776165	0.0295037	0.0280668	-0.122575	-0.00305059	-1.00952	-1.07775	-1.02443	0.127232	461
2019-03-15	0.365392	-0.246101	-0.415502	0.0453813	-0.36114	-0.626514	-0.440655	0.207826	0.502636	0.120638	0.00132985	0.614652	0.42839	-0.00524772	0.153224	462
2019-03-18	0.0848777	-0.277905	-0.203996	0.742899	-0.446981	-0.252679	-0.0514227	0.31994	0.109994	-0.0396192	0.000507793	0.122561	0.073323	-0.00524772	0.310173	463
2019-03-19	-0.844494	-0.0731451	-0.1655	-0.531555	-0.0429419	-0.0556207	-0.0893062	0.0985174	0.0641491	0.0189657	0.0003708	0.122278	0.0917002	1.37385	0.463531	464
2019-03-20	0.576408	0.0214586	-0.10796	0.972621	-0.55491	0.294572	-1.03778	0.0832285	0.0383489	0.0497782	0.00146415	-0.387581	-0.353989	0.637284	0.432605	465
2019-03-21	0.732269	-0.895075	-0.165273	1.60215	-1.04958	-0.493174	0.187171	-0.377288	-0.545784	-0.352457	0.000370224	0.439745	0.794504	0.911066	0.045688	466
2019-03-22	0.642866	-1.77732	1.52281	-1.96852	0.364101	0.403697	1.1291	-0.00457422	0.128926	-0.00810358	-3.96044e-05	0.0884489	-0.314241	-1.34916	-1.30619	467
2019-03-25	0.20631	0.501436	-0.800354	0.220468	-0.451034	-0.514803	-0.457199	-0.349836	-0.301487	-0.357426	-0.00414344	0.631476	0.219986	-0.0768069	0.28414	468
2019-03-26	-0.508028	0.627064	0.852657	-0.156218	0.492926	-0.578447	0.348983	-0.0175787	-0.0178026	-0.0356848	0.00215065	-0.322357	-0.333012	0.422854	-0.454129	469
2019-03-27	0.781036	-0.216687	0.585444	0.314809	0.149487	1.51823	0.624081	0.500489	0.61312	0.300298	0.000644128	-0.601885	-0.167664	0.207682	-1.54639	470
2019-03-28	-0.176601	0.228569	0.277412	1.41183	0.149409	-0.209454	0.633762	-0.139048	-0.213751	-0.210123	-0.00127057	-1.27268	-0.784687	-1.43902	-4.02481	471
2019-03-29	-1.1189	0.196465	0.161627	0.767267	0.234879	-0.559383	-1.46079	0.368765	0.589932	0.0444852	0.00160144	-0.032094	-0.377637	0.644123	1.13287	472
2019-04-01	-0.282564	0.939517	0.355447	-1.51558	0.576168	-0.29582	-0.0622571	0.180989	-0.253962	0.168428	0.00132642	-0.213392	-0.133104	0.209682	0.376774	473
2019-04-02	0.224768	0.0214969	0.472503	1.48514	-0.0217121	1.28097	0.646095	3.48396	2.38593	1.52303	0.0120581	-0.323555	-0.190302	-0.220178	0.80603	474
2019-04-03	-0.738272	0.226422	-1.07798	-1.97424	-0.320627	-1.4574	-0.684029	0.444676	-0.35676	-0.433196	-0.00247768	-0.0404738	0.509973	0.849965	-0.729412	475
2019-04-04	0.73293	0.084409	0.509912	1.48097	0.703544	0.249944	0.365101	-0.348966	-0.339712	-0.443513	-0.00465679	-0.672441	-0.321547	1.39399	-1.16088	476
2019-04-05	0.521344	0.225902	-0.0124745	0.850143	0.042242	0.272262	0.0729463	0.433273	0.747154	1.17987	0.00457758	0.396798	0.395264	1.43021	-0.45871	477
2019-04-08	-1.24475	-0.403597	-0.862902	-0.513091	-0.170795	-0.557844	-0.137895	0.968781	1.3541	-0.233047	0.00172167	0.921035	-0.226594	0.733392	0.567604	478
2019-04-09	0.0674811	-0.641431	-0.301529	0.00523294	0.12749	-0.120842	-0.262375	-0.421302	-0.417864	-0.352014	-0.000175006	0.198459	0.412479	-0.676368	0.736617	479
2019-04-10	0.0323972	-0.279018	0.23817	-0.701612	0.446589	-0.642361	0.219051	0.584455	0.184039	0.189132	-0.00601063	0.151899	-0.0569979	-0.88889	-0.300815	480
2019-04-11	0.994561	0.858675	0.0840407	0.439882	0.190965	0.64039	0.181077	-1.27821	-1.30939	-1.03867	0.002542	-0.61066	-0.338786	0.472149	-0.213507	481
2019-04-12	-0.824642	0.791526	-0.801785	-0.239388	-0.1916	-1.0542	-0.814363	0.089132	-0.123767	-0.177242	-0.00126186	-0.432038	-0.378467	0.0626479	-0.424646	482
2019-04-15	0.697062	-0.0258433	0.00689386	-0.252613	0.488267	-0.0551575	0.17057	-0.146852	-0.374537	-0.218438	-0.00357674	-0.785159	-0.514381	-1.10075	-0.0356536	483
2019-04-16	-0.387264	-0.104271	0.2184	0.766276	0.593078	0.0746901	0.208361	0.596698	0.530993	0.172654	0.00390507	-0.845679	0.0186569	0.339215	-0.00555417	484
2019-04-17	-0.0901668	0.0525848	-0.0700413	0.182371	0.718138	0.118065	-1.31997	0.0669631	-0.00750285	0.367436	-0.000854808	-0.0959352	0.190172	-0.1428	0.174712	485
2019-04-18	0.469419	-0.119961	1.08647	0.455685	1.17789	0.378607	1.1359	0.189152	0.701436	0.0325571	0.000911419	-0.0659982	-0.1911	0.269546	0.737153	486
2019-04-23	0.834251	-0.151412	0.548702	0.827173	1.35934	1.1655	0.900187	0.968631	-0.362794	-0.692221	0.00321602	-0.584993	0.0567451	-0.280042	-0.509131	487
2019-04-24	0.779229	-0.10437	0.414139	-0.0496815	-0.689029	1.52777	-0.235013	-0.440963	-0.505798	-0.833424	-0.00193777	0.131555	-0.671417	-0.0741401	0.849807	488
2019-04-25	0.499837	-0.371777	1.01861	0.637776	0.334462	0.342193	1.13018	-0.914636	-1.08338	-0.377658	-0.0206825	0.729487	0.211359	-0.489685	0.314289	489
2019-04-26	-0.609281	-0.0101042	-0.265954	-0.393806	-0.167108	-0.76332	-0.741438	0.327178	0.265846	0.44459	0.0106626	0.236234	0.496618	0.754294	0.369259	490
2019-04-29	-0.193645	0.288642	-0.226704	0.0877193	0.250767	-0.232201	0.261623	-0.317525	-0.358416	-0.409097	0.0242076	-0.453415	-0.133862	0.473219	0.16629	491
2019-04-30	-0.367693	-0.655377	-0.673001	-1.44642	6.34001e-05	0.296659	0.0727476	0.311124	0.694322	0.610235	0.00732483	0.185461	0.0376213	-0.483715	-2.08664	492
2019-05-01	-0.176692	-0.373051	-0.864142	-0.824808	-1.2988	0.032248	-0.159154	0.213039	-0.180499	-0.243777	-0.0129199	0.074457	-0.421029	-0.487497	-0.0958524	493
2019-05-02	0.883483	0.305597	1.2079	0.807998	0.922612	0.784558	0.0889423	0.397712	0.100442	-0.0483553	0.00735461	-1.15131	-0.811611	-1.75937	-0.156494	494
2019-05-03	-0.749597	-0.199377	-0.031952	-1.44796	-0.0209074	-0.366355	-0.00814309	1.02791	0.597918	0.154431	-0.000978462	0.597659	-0.0974239	-0.147781	0.0246781	495
2019-05-07	0.813616	-1.5158	0.162319	1.1859	0.793907	0.298244	2.23913	0.266259	0.114332	-0.411195	0.0162315	0.172859	0.658186	1.1258	-0.829741	496
2019-05-08	-0.245522	-0.37639	-0.536609	0.523398	-0.689238	-0.011879	0.329358	0.478502	0.108146	0.0444805	-0.0122916	0.287118	0.364142	-0.215728	-0.315055	497
2019-05-09	0.552047	-0.937346	-0.419192	0.0188893	-0.985714	0.61023	2.32966	0.684167	-0.0259074	-0.227792	-0.0178131	0.023254	-0.441772	-1.21189	-1.52452	498
2019-05-10	-1.07864	-0.00981115	-0.244492	-0.308598	-0.484174	-0.500889	-0.215694	0.637363	0.155482	0.12572	-0.00356793	0.0316821	-0.115953	0.423355	1.20156	499
2019-05-13	0.674724	-0.636094	0.180899	1.03064	-0.929394	1.10174	2.89739	4.41366	2.08304	1.01654	-0.00575858	0.665373	-0.542921	0.20793	0.523192	500
2019-05-14	-0.0200154	0.776679	0.490974	0.554548	0.528322	0.0328324	-0.156039	0.480466	1.70361	3.0735	-0.00318162	0.182499	0.349232	-0.218425	0.0253376	501
2019-05-15	-0.593154	-0.186055	-0.0124901	0.597646	0.0631728	0.346276	0.0182713	0.417498	2.1827	1.44036	0.00160061	0.00567288	0.21214	-0.793334	-0.596508	502
2019-05-16	0.0147177	0.470337	0.589166	1.04326	0.253044	0.549397	0.466988	-0.862265	1.04856	-1.21536	0.00214429	-0.676756	-0.0966876	-0.294368	0.739511	503
2019-05-17	0.761143	-0.00986075	0.24024	1.11919	0.168513	0.686932	1.8337	-1.54645	-1.36586	-1.01451	0.00757657	-0.978236	-1.24828	-1.3976	-0.594279	504
2019-05-20	-0.783873	0.0700212	-0.0709162	0.0750875	-0.527676	-0.890519	-0.38102	1.70835	0.391642	0.224787	0.000909432	-0.390341	-0.27643	-0.826112	0.0256426	505
2019-05-21	-0.124426	0.993469	0.240408	-0.399542	0.485257	0.821582	-0.555021	-0.148214	0.169197	-0.0305789	-0.00248132	-0.541566	0.0398217	-0.0804224	0.366971	506
2019-05-22	-0.141898	-0.53476	0.0458372	1.02591	-0.274407	-0.102199	0.239106	-0.891951	-0.666708	-0.80056	-0.00534504	0.174173	0.000220912	-0.458251	-0.691119	507
2019-05-23	0.935505	-1.14427	-0.304458	0.117446	-1.03724	-0.372634	0.165357	0.571014	-0.00947248	0.206159	0.00390743	0.787716	0.158152	-0.538039	0.119948	508
2019-05-24	-0.297616	-0.346705	-0.478702	-0.471182	-0.382548	-0.416729	-0.481519	0.281315	0.271958	0.0811883	9.62967e-05	-0.151004	0.255785	0.147454	0.554508	509
2019-05-28	0.326949	0.150703	0.395283	0.453589	1.39817	-0.370862	0.417923	1.93946	1.38576	2.07715	-0.00221565	-0.41124	-0.294903	0.299013	0.394238	510
2019-05-29	1.03519	-0.427342	0.80527	0.525058	-0.401867	0.392035	0.30714	-0.225721	-0.192352	-0.203529	0.00227233	0.23254	-0.435081	-0.615295	0.0556083	511
2019-05-30	-0.434553	0.664168	-0.0711257	0.174152	0.190172	0.0330653	-0.675815	-1.03834	-0.935725	-0.779535	-0.00384959	-0.112801	0.0796496	-0.389649	0.024993	512
2019-05-31	0.256555	-1.65088	-0.168548	-0.00884977	-0.826531	-0.460737	0.0760407	0.706432	0.831448	0.592192	-0.00208506	1.18401	0.296755	-0.00524772	0.750832	513
2019-06-03	-0.902551	-0.462819	-1.10096	-0.00884866	-0.829916	-0.571134	-0.00288225	-1.20597	-1.1725	-0.660083	9.68545e-05	1.74769	0.860791	0.684939	-0.914904	514
2019-06-04	-0.940846	-0.171744	-0.573925	-0.753521	-1.13314	-0.724799	0.223258	-1.28612	-0.653911	-0.668937	0.000778862	0.537831	0.0386513	1.2028	0.208435	515
2019-06-05	-0.141981	-0.188097	-0.109084	-0.428889	-0.429558	0.27735	0.0549408	0.218823	0.281693	0.0396417	0.00336539	0.833505	0.443998	0.811619	-0.0360559	516
2019-06-06	-0.613131	-0.220746	-0.995661	-0.092648	-0.688919	-0.234411	-0.0186563	-0.0337376	0.150954	0.585869	0.000504407	-0.0163747	0.421179	-1.87784	-0.158404	517
2019-06-07	-1.52705	0.0878762	-0.569406	-0.371804	-0.173065	-0.411634	-0.139584	0.514487	-0.00313391	-0.0161921	-3.96044e-05	0.366982	-0.191617	0.146693	0.451298	518
2019-06-10	-0.495399	0.638753	0.256436	0.788128	0.473363	0.833259	1.25697	-0.0430699	-0.176078	-0.666974	0.00199851	-1.03877	-0.654911	-0.0811708	0.0247227	519
2019-06-11	0.560362	-0.0905714	-0.0891178	-0.554329	0.601217	0.166632	-1.01042	-0.329833	-0.199925	-0.295968	-0.00112622	-0.407039	-0.213494	0.44888	1.21696	520
2019-06-12	0.120312	-0.187768	0.122113	0.43874	0.428339	0.301011	0.275505	0.63	1.10243	0.261086	0.00063963	0.60839	0.348357	0.220555	0.141074	521
2019-06-13	0.558713	0.00655364	0.680226	0.215375	0.0637843	0.705673	0.259543	0.183277	-0.466357	-0.0900516	-0.0026225	0.237309	-0.000260463	-0.23105	1.00644	522
2019-06-14	0.90671	-0.0258433	1.12732	1.08789	0.961214	0.844543	0.175449	1.10169	0.464121	0.0786212	0.00322219	1.194	0.861192	-0.231889	0.250693	523
2019-06-17	0.276428	0.168413	-0.341442	0.471255	-0.149703	0.259554	0.012833	1.58978	0.622577	1.38864	-0.001126	-0.859959	-0.958224	-0.843545	0.136118	524
2019-06-18	-0.0375399	-0.301103	0.762329	0.30243	0.276869	-0.283312	-1.31622	-0.62599	-0.557145	-0.638545	-0.00384883	-0.0490942	0.422962	0.453433	1.08303	525
2019-06-19	-0.596243	-0.0744632	-0.342095	-1.09615	-0.704969	0.0333269	-0.0397212	0.373599	0.198072	0.187118	0.00390546	0.166348	0.171777	0.146883	0.378286	526
2019-06-20	-2.71026	-1.3927	-1.34498	-1.04739	-2.97277	-1.07075	-2.57513	0.569371	0.164093	-0.161095	-3.96044e-05	2.78873	1.43263	0.899652	0.455766	527
2019-06-21	0.156431	0.0231565	-0.83857	-0.0367425	-0.674253	-0.0792223	0.923562	1.44543	1.34678	0.376653	-0.000175451	1.33465	-0.168728	-0.910147	-0.603548	528
2019-06-24	-0.374078	-0.336406	-1.2361	-0.344177	-1.48584	-0.996241	0.372321	1.76717	0.893033	0.864011	-0.00671274	0.61283	0.278391	0.674682	0.484359	529
2019-06-25	-0.569762	-0.747157	0.140413	0.102999	0.152395	-0.256998	0.166103	1.43558	0.297013	-0.192405	-0.00427832	1.92459	0.0917726	-0.00524772	0.183401	530
2019-06-26	-0.980588	1.15295	-0.069413	0.340838	0.764295	-0.345509	-0.0609362	2.19312	1.03459	-0.0489638	-0.0115919	-2.1669	-0.559684	-0.457691	0.28963	531
2019-06-27	0.10421	0.120951	0.350486	0.32745	0.151856	-0.189523	-0.108471	-3.29899	-2.19559	-1.77673	0.00203049	-0.165964	-0.0382754	0.372021	-0.139466	532
2019-06-28	-0.430489	0.153406	-0.0313099	-0.414935	-0.153619	-0.255808	-0.600114	2.05529	0.684388	0.497573	0.0060146	0.451589	-0.131987	0.51904	-0.193767	533
2019-07-01	0.585377	0.916275	1.29039	0.846564	2.3224	1.01075	-0.871401	-3.51885	-0.903835	-0.64644	0.0107634	-1.52735	0.130295	1.83126	0.742176	534
2019-07-02	-0.127285	-0.740091	0.122205	0.638855	-0.0654515	-0.657361	1.20936	0.404258	-0.228305	-0.313056	0.00186596	0.0214131	-0.357286	-0.95333	-0.0585143	535
2019-07-03	-0.841089	-0.253714	0.507283	0.443046	0.107344	-0.919903	0.461883	2.0338	0.486439	0.16913	0.00104809	1.69453	0.504935	0.214852	0.179508	536
2019-07-05	0.675432	1.12675	1.14668	0.884109	1.29126	1.43015	0.61937	-1.86056	-0.798779	-0.888376	-0.000991292	-1.98936	-0.393705	-0.593954	0.440442	537
2019-07-08	-0.359322	0.249011	0.161903	0.0478696	0.342702	-0.011879	-0.6251	2.40763	1.37048	0.725991	0.00227048	0.843234	-0.547517	-1.04935	-0.188614	538
2019-07-09	0.621111	0.0710614	-0.0318688	0.574702	-0.193504	0.904641	0.29783	0.467823	-0.293495	-0.288189	-0.00302988	-0.721829	-0.190302	-0.155875	-0.321281	539
2019-07-10	-0.430228	-0.575678	-0.959933	-0.621083	-0.752866	-0.83922	-0.858119	-0.827606	-1.06189	-1.14968	-0.00440084	1.25297	0.245821	1.04142	0.649493	540
2019-07-11	-0.502478	-0.268966	-0.0123988	-0.590562	-0.108296	-0.412781	-0.129731	-1.50748	-1.25784	-1.28178	0.00227904	0.36847	0.619846	0.142821	-0.0836105	541
2019-07-12	-0.521458	-0.496836	0.141979	-0.0514054	-0.864316	-0.566976	0.59411	0.757701	0.334846	0.549271	0.00336301	-0.529069	-0.489011	-0.525068	-0.608966	542
2019-07-15	-0.11015	-0.204827	-0.108898	0.430461	0.064215	-0.653316	-0.150692	-1.85327	-3.1182	-1.26836	-0.00521495	0.318453	0.655236	1.83126	0.257889	543
2019-07-16	0.122717	0.721423	0.934965	1.64476	0.949109	0.34169	-0.0926428	-3.17272	-2.3595	-0.796552	0.00173312	-0.250427	0.259269	0.067075	-0.321889	544
2019-07-17	-0.038489	-0.431572	-0.380284	-0.423931	-0.410255	-0.0340006	-0.124362	0.642689	0.955451	0.621946	0.00295515	-0.0144561	0.772282	-0.513317	-0.324344	545
2019-07-18	0.873298	-0.611744	0.0842743	-0.793111	-0.151779	-0.497759	0.292894	1.97679	1.0649	0.399677	-0.000719652	0.495004	1.49631	0.502821	-0.596508	546
2019-07-19	-0.163317	0.0393534	0.161738	-0.0800916	-0.8231	0.0101735	0.118535	-0.217711	-0.419647	-0.0956056	-0.000311719	1.64707	0.986615	0.713302	0.425072	547
2019-07-22	0.603636	0.185879	0.123099	0.361023	-0.152606	-0.011879	-0.055642	-0.387236	-0.248884	0.0797461	-0.00399138	-0.963028	0.224883	-0.363465	-0.980891	548
2019-07-23	0.406587	0.218135	1.13343	0.376011	0.735938	0.939354	-0.092601	-1.19783	-0.454544	-0.551249	0.00118803	-0.2215	0.137031	0.281494	0.674213	549
2019-07-24	-0.0737946	0.00666156	0.299192	-0.692898	0.150687	0.454803	-0.377878	-0.240877	0.247247	0.252295	0.000914462	0.0539897	0.344157	1.12843	0.102172	550
2019-07-25	0.192868	0.784828	-0.285404	0.389578	0.991493	0.523194	-0.0239973	0.267152	0.138256	-0.117826	0.000641463	-0.886364	-0.0195589	0.27491	0.0213333	551
2019-07-26	0.742428	0.152003	0.689535	1.20632	0.751327	1.01886	0.366887	-0.307304	-0.0189218	0.390446	0.000368873	0.277806	-0.348535	-0.566855	0.0750028	552
2019-07-29	-0.641182	0.248657	-0.402948	2.18495	-0.343931	-0.011879	0.740757	-0.623223	-0.660619	-0.582013	-0.00372031	-0.156964	-0.193469	0.276202	-0.139904	553
2019-07-30	0.316803	-0.348829	-0.110062	1.28797	-0.150977	0.799585	-0.503721	-0.0507719	-0.13934	0.311401	0.00377724	0.472514	0.20642	0.553787	0.555784	554
2019-07-31	-0.464273	-0.155204	0.357951	-1.04497	-0.108088	-0.373053	-0.00814309	1.08358	0.65541	0.0330172	0.000232618	0.0730822	0.0497936	-0.284125	-0.378926	555
2019-08-01	1.0435	-0.511797	1.33825	1.09933	0.793978	0.666013	0.72444	0.597311	-0.0992516	-0.195965	0.000640715	-1.65152	-1.67204	-2.06616	-2.26335	556
2019-08-02	0.26256	-2.70642	-0.972839	0.195563	-2.52343	1.17019	2.17031	0.247761	-0.0196138	-0.198536	-0.00235408	2.62568	0.654235	-0.222474	-1.79906	557
2019-08-05	-0.374078	-1.04998	-1.64858	-0.477515	-2.13744	0.582547	5.67273	2.53389	1.15538	0.41127	9.66499e-05	1.7118	0.993772	1.07323	1.41833	558
2019-08-06	0.986438	0.685082	0.0262969	0.239129	1.35344	0.217353	-1.50023	-0.69144	-0.531812	-0.454938	-0.00140276	-0.0531633	-0.366956	-0.290982	0.165455	559
2019-08-07	1.36807	-1.40069	-0.767877	-0.126371	-1.59661	0.355598	2.05541	0.958598	-0.104975	-0.0661925	0.00145979	2.94492	1.47645	-0.076891	-1.07163	560
2019-08-08	-1.56737	0.671207	0.510181	0.297819	0.962369	-1.33987	-0.790911	0.276131	-0.371854	-0.142348	0.000641395	-0.802297	0.655325	-0.0769752	0.372176	561
2019-08-09	-0.26742	-1.25584	-0.225537	0.782924	-0.876598	0.35333	0.882638	-0.23673	-0.865298	-0.549777	-0.000311963	0.0890581	-0.0866894	0.920695	0.340063	562
2019-08-12	0.103265	0.107546	0.200569	0.225954	-0.286401	0.904918	-0.188183	-1.36776	0.0438446	0.156896	-0.00181127	0.455854	-0.170892	-0.43086	-0.0916862	563
2019-08-13	-0.196923	1.99588	0.588958	0.04941	1.07286	-0.974374	-0.806536	-1.05063	-0.254816	-0.151207	-0.000448776	-0.511172	1.60708	-0.00524772	-0.178362	564
2019-08-14	1.73981	-1.36554	0.746421	-0.00949395	-0.154013	1.27278	-1.03576	-1.84222	-1.83002	-1.67731	0.00200503	1.02337	-1.10994	-0.43385	0.310707	565
2019-08-15	0.0323972	0.521192	0.748947	-0.641545	0.58904	-0.976366	0.524101	0.504641	0.078242	0.020665	0.0015939	0.11983	0.561265	-1.01719	0.251406	566
2019-08-16	-0.740207	0.337903	0.300509	-0.580712	0.848521	0.0339134	0.435658	0.0190649	-0.325325	-0.204985	0.000504461	-0.0819765	-0.450463	-0.297484	0.419172	567
2019-08-19	0.454174	0.238227	-0.0910219	0.210094	0.194763	0.217286	0.435116	1.15358	1.45139	1.01236	-0.000991862	-1.40509	-0.80685	0.867295	0.0507455	568
2019-08-20	0.435762	-0.273398	0.0852229	-0.214252	-0.326831	-0.126504	0.496307	-0.374823	-0.496227	-0.391931	-0.000175695	0.525176	0.300016	0.13897	0.912418	569
2019-08-21	-0.985906	0.254692	-0.110589	0.166162	0.542398	-0.355246	0.125573	-1.35118	-0.810983	-0.437098	-0.00112882	-0.147525	0.281555	0.425372	-0.0606086	570
2019-08-22	0.34896	-0.157804	0.183142	-1.56852	0.411199	0.629688	1.04956	-0.130469	0.238004	0.200148	0.00172993	-0.140339	-0.522302	0.137619	-0.365218	571
2019-08-23	0.418588	-1.91714	-1.14592	-0.154278	-1.85008	0.332911	0.499079	0.565276	0.241497	0.270932	0.000504407	0.0739447	0.282618	-0.291317	-0.508808	572
2019-08-27	-0.793156	0.80618	1.06177	-0.385688	1.48002	-0.218845	3.43143	-0.491009	-0.637001	-0.377086	-0.00126394	2.04261	2.19718	0.707426	0.66409	573
2019-08-28	0.436818	0.0737352	0.202805	0.584682	-0.152747	0.264137	0.118625	-1.06732	-1.3137	-0.693386	9.64867e-05	0.245512	2.00562	1.04839	-0.590893	574
2019-08-29	-0.00267079	1.03283	0.497446	0.746781	1.01775	0.264628	-0.993027	-0.60186	-0.44401	-0.00285435	0.000776657	0.163221	0.336847	3.18302	0.5521	575
2019-08-30	-0.160791	-0.355993	1.38636	0.457495	1.01311	0.0803996	0.545548	0.169731	-0.0825295	-0.0977289	0.00213471	-0.892713	-0.313821	1.04319	1.59674	576
2019-09-03	0.734312	-0.721185	0.422448	1.17771	-0.560851	-0.656681	1.2232	2.21236	0.996309	0.331909	-0.00207792	0.619702	0.259254	0.124549	-0.460857	577
2019-09-04	-1.47897	0.636449	-1.11919	-1.51748	-1.16913	-0.882707	-1.76268	-0.142889	-0.413832	-0.236347	0.000640172	0.530887	2.4895	2.28506	0.926396	578
2019-09-05	-0.179044	1.09435	-0.249118	-2.12505	1.1247	-0.55937	0.134158	-0.0530428	-0.12507	-0.145446	-0.000175533	-1.26009	-0.271501	-0.06772	0.178325	579
2019-09-06	-1.20555	-0.288777	-0.0718183	0.553475	-0.0222309	-0.829514	-1.72455	-0.59901	-0.490138	-0.279022	-0.00044747	-0.439351	-3.30571	-1.84535	-0.692723	580
2019-09-09	-0.535329	0.532421	-0.268374	-0.98901	0.968821	-0.419088	0.394949	-0.0509547	1.0695	0.350065	0.000368262	-1.09696	0.0590511	0.762916	0.550357	581
2019-09-10	0.0151041	0.301721	0.282162	0.192129	-0.0220479	0.123739	-0.462291	-0.49379	-0.0885276	-0.0271997	0.00036814	-0.848077	-0.587982	-1.29095	0.073251	582
2019-09-11	1.02596	0.611155	0.815049	0.379616	0.557747	0.214414	0.155212	0.0749628	-0.180483	-0.209241	0.000503865	-0.608307	0.533151	0.0596849	0.490064	583
2019-09-12	0.174223	0.36501	-1.42993	-0.397917	-0.881653	-0.305996	-1.88091	0.495552	0.191081	-0.0861533	-0.000583073	1.73002	0.0589647	0.51174	0.407219	584
2019-09-13	1.03828	0.217999	0.00689386	-1.49848	0.171645	-0.350554	-0.177475	-0.206686	-0.0105533	0.0349054	0.000232157	-0.928404	-0.160979	0.507396	-0.00555417	585
2019-09-16	-0.496105	-0.318495	1.34501	0.562272	0.472405	0.462473	-0.496055	-0.237257	1.40377	0.268259	-0.000311366	-0.482492	-1.00342	-0.582276	0.0713811	586
2019-09-17	0.156047	0.266808	-1.11532	-0.993339	0.149759	0.146561	1.25395	-0.180326	0.832029	1.15076	-0.00031142	0.303517	-0.00355486	-0.587786	-0.211036	587
2019-09-18	0.595958	0.0553624	0.0461717	0.218741	0.556828	0.305486	-0.295062	-0.118009	0.180411	1.22569	-0.00112741	0.0485316	0.0124357	0.0597541	-0.0313118	588
2019-09-19	-0.442689	-0.302096	0.301704	-0.0374892	-0.472016	1.10403	0.555234	0.13657	0.728525	-0.583486	0.00281404	-0.256648	-0.324235	-0.265672	0.353591	589
2019-09-20	0.173436	-0.107177	0.834497	-0.108642	0.0853102	0.560569	-0.264115	-0.219694	-0.201808	-0.337632	-0.00194137	0.0340908	0.380993	0.320109	0.953729	590
2019-09-23	0.0501354	-0.808567	0.263697	0.875382	-0.75271	-0.0577525	1.31584	-1.10313	-1.37837	-1.27064	-0.00139963	1.40524	1.55513	1.02438	0.119016	591
2019-09-24	-0.319687	-0.271162	-0.151175	-0.665586	-0.453231	-0.492735	-0.161254	-2.95506	-3.22465	-1.84293	0.00295067	-0.157204	0.536862	-0.133005	0.31657	592
2019-09-25	0.455104	0.725383	0.996715	1.60797	0.817821	0.974333	0.884093	-0.264157	0.230194	0.656993	0.000639089	0.526764	0.0111949	-0.583491	-0.903854	593
2019-09-26	-0.143429	-0.205192	0.225261	0.292964	0.428997	-0.103884	-0.0743482	-1.04403	-0.471002	-0.221052	0.00036745	-1.66087	-1.89475	-0.850285	0.868056	594
2019-09-27	-0.372565	0.592951	-0.0725378	0.452138	-0.172244	-0.241654	-0.426023	0.281094	0.823803	-0.0276784	-0.000718095	-1.25544	-1.46751	-0.465163	0.16696	595
2019-09-30	-0.126099	0.0716621	0.742747	0.106303	1.28423	0.401961	1.31011	0.218066	0.646101	0.731466	0.00213038	-0.390718	-0.889743	-1.6767	0.0927009	596
2019-10-01	-0.143812	-0.693212	-0.530326	0.917457	-0.877574	0.981226	-0.0284659	-0.000982328	-0.462894	-0.469702	-0.000446213	-0.927572	-0.501372	-1.3069	-0.35048	597
2019-10-02	1.36983	-0.82677	-0.370355	-1.0225	0.855412	0.104012	-0.00814309	0.113502	0.389908	0.223285	0.0014507	1.35645	0.478796	-0.143894	0.388412	598
2019-10-03	0.172709	-0.76462	-0.785179	-1.10267	-0.000409754	-1.23594	-0.00814309	-0.418023	-0.574095	-0.345252	-0.000581345	1.72411	1.0942	0.958721	-0.152849	599
2019-10-04	0.155058	0.220761	0.343172	1.17088	-0.321038	-0.310653	-0.00814309	-0.264286	0.0734621	0.270388	-0.000310556	-1.35245	-0.0033412	-1.38706	-0.227491	600
2019-10-07	-0.476178	0.220415	-0.19098	-0.182361	-0.214487	0.494076	-0.00814309	0.0870595	0.36508	1.14773	-0.0018021	0.0996434	-0.606319	0.827587	0.0191648	601
2019-10-08	0.470837	-0.0258433	0.700242	1.68619	-0.12901	0.334038	-0.267358	-0.0929232	0.0517941	0.0548592	-0.00112535	0.280811	0.404816	0.132459	-0.502783	602
2019-10-09	-0.090285	0.580122	-0.567752	-0.125757	0.235137	-0.081124	-0.547497	0.968746	1.03208	0.134511	-0.0012621	0.0482784	0.707563	-0.280973	1.10486	603
2019-10-10	-0.933407	0.757172	-0.783235	-2.408	0.106562	-0.932207	-0.839093	-0.0617297	-0.167282	-0.540229	0.00104712	-0.958596	-0.115975	0.544963	0.164511	604
2019-10-11	-1.64487	0.964228	-0.406776	-4.2633	0.298961	-0.789893	-1.46561	-0.828458	-0.979817	-0.172532	-0.00126223	-1.20208	-0.504098	-0.210996	0.139657	605
2019-10-15	0.316076	0.475177	0.0659414	-0.74982	0.341283	1.06464	-0.284956	-0.322487	-0.0337033	0.975369	0.00213319	0.583353	0.207071	0.2005	0.973216	606
2019-10-16	-0.144282	-0.219617	-0.759475	-1.61979	-0.470434	0.0340964	0.535031	-0.509069	-0.604776	-0.259211	-0.00166887	-0.251447	-1.37649	-0.210996	0.510179	607
2019-10-17	-0.978582	-0.349275	-1.04979	0.0190593	-1.89123	-1.63573	-0.79755	0.151359	0.232054	0.803592	0.00104679	0.500393	0.622051	-0.1428	-0.0288566	608
2019-10-18	-0.0382354	-0.139185	-0.500052	-0.698542	-0.281415	-0.466253	0.191934	-0.396672	-0.463576	-0.376233	0.00226612	-0.247138	-0.0686584	-0.00524772	0.0177483	609
2019-10-21	-0.608099	0.184591	0.201733	-1.07946	0.21537	-0.487545	-0.300601	0.66448	0.099556	-0.112577	-3.96044e-05	0.0676541	0.922294	0.611308	0.180391	610
2019-10-22	-0.252422	-0.0420216	0.143385	0.484975	0.538544	0.0786119	0.0585785	-0.534419	-0.300446	-0.0984723	-0.0015311	-0.515187	-0.342584	-0.552988	-0.401699	611
2019-10-23	0.0508698	0.103541	0.397343	0.858253	0.408321	0.350613	-0.711903	-1.64055	-0.951014	-0.843485	0.00104528	0.613579	-0.311852	0.610616	-0.0289762	612
2019-10-24	-0.199046	-0.0581805	0.398046	1.05649	0.364689	0.670082	0.300241	-0.212356	-0.193609	0.106277	0.0014507	0.100124	-0.0358414	2.0697	0.251357	613
2019-10-25	-0.252842	0.184242	0.339927	-0.313567	0.492689	-0.285023	-0.198282	3.37297	2.00292	1.00544	-0.00315756	1.17266	1.88617	0.257419	0.319116	614
2019-10-28	-0.0205504	0.409687	-0.247825	-0.368282	0.341991	-0.239132	0.110063	1.31627	-0.016163	-0.20216	-0.00248473	-1.58212	-0.240489	-0.664047	0.270707	615
2019-10-29	0.26538	-0.332215	-0.443032	-0.615552	-0.492958	-0.533303	-0.0852298	0.437149	0.758175	0.301554	0.00131934	-0.467219	-1.28252	-0.204283	-0.235642	616
2019-10-30	1.79424	0.0548328	-0.110325	0.460263	-0.558682	-0.23804	-0.594537	-0.657129	-0.678608	-0.350791	-3.96044e-05	0.338947	0.926293	-0.0717373	0.178619	617
2019-10-31	-0.623799	-1.30488	-0.617207	-0.917401	-0.862257	-0.373053	-0.843073	-0.0631783	-0.113445	-0.0349935	-0.000175438	1.31727	0.297545	1.24583	0.132036	618
2019-11-01	0.0150987	0.0878657	-0.265588	-0.145788	-0.25986	-0.597002	-0.0649055	0.137155	0.0360017	-0.1693	0.000503648	-0.208606	0.185618	-0.070458	0.154387	619
2019-11-04	-0.00267079	0.622514	0.493708	0.610087	0.366501	0.347936	-0.359235	0.346695	0.215216	0.305909	-0.000447023	-0.00614575	0.184884	0.772712	-0.096873	620
2019-11-05	0.547513	0.89395	1.45429	0.501649	1.33326	0.123267	-1.136	-0.253772	0.219596	0.0511372	-0.0018065	-1.54587	-0.46081	-1.43917	-0.534614	621
2019-11-06	0.192245	-0.460934	-0.110823	-0.0223821	-0.236575	0.236194	-0.599336	0.0166893	0.197463	0.389509	-0.000855866	-0.265984	-1.64017	0.323617	0.546355	622
2019-11-07	-0.17986	0.87537	0.615783	0.599905	0.749783	-0.32754	-1.05806	-0.326746	-0.417386	-0.896453	-0.00126491	-0.185468	-0.0521192	-0.0708789	0.131272	623
2019-11-08	0.722952	-0.475872	0.518894	0.546313	0.384431	0.914373	0.969109	-1.15045	-0.295693	-0.733962	-0.000312045	-1.54156	-2.41409	-2.75879	-0.833433	624
2019-11-12	0.156311	-0.106327	0.0463285	-0.895654	-0.878206	0.169499	0.572802	0.0366471	0.234624	-0.193698	0.00173029	-0.959048	-0.274863	-1.32468	-1.66472	625
2019-11-13	0.209137	-0.444954	0.263394	0.212725	-0.774321	0.328777	0.804656	-0.124856	0.0895575	-0.0267623	-0.000175668	0.759485	0.709281	-0.14581	0.187493	626
2019-11-14	0.208945	-0.834648	-0.229886	-0.533743	-0.280742	1.15197	-0.152968	-0.361034	-0.311778	-0.221006	-0.000447878	0.226305	0.26604	0.345554	0.377838	627
2019-11-15	-0.408436	0.734538	-0.583929	-0.298085	0.559375	-0.697553	-0.629475	-0.530071	-0.496883	-0.410144	0.00186463	-0.0345575	-0.575268	0.759487	0.0659352	628
2019-11-18	-0.320718	-0.332835	-0.641161	-0.874215	-0.49592	-0.239766	0.876933	-0.764331	-0.190692	-0.476172	-0.000855377	0.00263509	-0.273953	0.270478	-0.220397	629
2019-11-19	0.403647	-0.0581894	0.0853431	0.540628	0.731313	-0.148451	0.0797292	-0.220784	-0.260576	0.0700128	0.00335623	0.00632357	1.09139	1.01776	0.987566	630
2019-11-20	1.4753	0.103506	0.242412	0.115257	0.214272	0.649334	0.410251	-0.177313	-0.140662	-0.218534	-0.00234785	0.188169	-0.0529085	0.800987	0.204169	631
2019-11-21	-0.705298	-0.252266	-0.0716405	0.0465097	-0.000525999	0.0795441	-0.312851	-1.38349	-1.37846	-0.398643	0.00145441	-0.39862	-0.103018	0.327564	-0.0753428	632
2019-11-22	0.278634	0.20058	0.754119	1.19259	1.0278	0.19402	0.528798	-1.11108	-1.28891	-0.767457	0.00280807	-0.246799	0.263706	-1.21196	0.0177219	633
2019-11-25	0.330939	0.426129	0.401205	-0.768833	-0.0431792	0.308952	-0.214565	-0.535214	-0.47485	-0.76091	0.000637538	-0.505073	-1.04257	-0.617677	0.663777	634
2019-11-26	-0.47689	0.231906	-0.0522984	0.488629	0.320032	-0.401373	-0.163037	0.0966812	0.162494	0.145679	-0.00112319	-0.334215	0.200003	0.539436	-0.0513663	635
2019-11-27	-0.020253	0.408252	0.204264	-0.422984	0.404869	0.148383	-0.209603	1.00384	0.535353	0.170148	-0.00166661	-0.0756788	0.383581	0.0624971	0.245783	636
2019-11-29	0.120377	0.118617	-0.328529	-0.793186	0.127469	0.400983	0.136506	0.626344	0.169034	0.322937	0.00253558	0.381314	-0.321647	-0.481049	0.649782	637
2019-12-02	0.120312	-0.636597	-1.09438	0.0464427	-1.71131	-1.31553	0.363548	-1.36476	-0.658021	-0.672617	0.00239557	0.021572	-0.323254	0.199122	0.573228	638
2019-12-03	-0.00267079	-0.92979	-0.267555	-0.89918	-1.22815	-0.51213	1.17152	-0.0698127	-0.153643	-0.00944475	-0.00247478	1.14678	0.43538	0.130619	-0.20498	639
2019-12-04	-1.51811	0.523536	0.261727	-1.26141	0.689477	-0.238734	-0.625829	-0.318399	-0.264509	-0.357399	-0.00166547	-0.215849	0.38181	0.602436	0.238058	640
2019-12-05	-0.622245	-0.316477	-0.541608	-0.942232	-0.4317	0.373972	-0.234891	0.542857	0.2973	0.402875	-0.000853267	0.0097213	-0.892786	-1.29531	-0.22696	641
2019-12-06	1.37585	-0.074329	1.02664	0.518944	0.817821	-0.057323	-0.508521	0.34164	-0.0102494	0.233541	0.000502891	-1.26543	0.216857	0.609237	0.479972	642
2019-12-09	-0.478932	-0.139029	-0.287756	-0.400452	-0.62494	0.0790223	0.203441	-0.573045	-0.146842	-0.0896357	-0.00112481	0.100042	-1.1084	-0.00524772	0.409194	643
2019-12-10	0.0502951	0.200455	-0.444128	-0.278196	-0.562031	0.397837	-0.322984	-0.416301	-0.263265	-0.141154	-0.00166904	0.189283	0.16907	1.33851	0.124553	644
2019-12-11	-0.515178	-0.122793	-0.0322813	0.0322067	0.107414	-1.14732	0.280901	-0.135583	-0.304971	-0.127681	-0.00126296	0.0846043	-0.0709414	0.524076	0.317923	645
2019-12-12	-0.30363	0.764347	-0.443113	0.586162	0.107379	-0.734229	-2.38409	-0.0503077	0.143787	-0.175778	0.00104788	0.0212333	0.678697	1.1692	0.527976	646
2019-12-13	0.192112	0.167132	-0.247046	-2.89392	-0.454868	0.552169	-0.00814309	0.0948031	-0.0408658	0.0964517	0.0029465	-0.142445	0.216927	-0.720276	0.709101	647
2019-12-16	-0.676245	0.551814	-0.207747	0.258362	0.042597	-0.373106	-0.0289169	-1.15504	-1.50354	-0.959506	-0.0019391	0.784696	0.266292	-0.0706678	-0.151676	648
2019-12-17	-0.0559305	-0.218185	-0.168564	2.88145	-0.586115	0.892769	0.230685	-1.0051	-1.44349	-1.57734	0.00199546	-0.208386	0.114466	-0.267632	-0.299367	649
2019-12-18	-0.678348	0.0703538	0.690026	0.520866	0.194569	-0.170573	0.313507	2.07287	1.3956	0.865295	9.59588e-05	-0.182684	-0.237509	-0.136864	-0.301484	650
2019-12-19	0.0863458	-0.587737	-0.28614	0.604157	-0.892155	-0.757832	0.344307	-0.390543	-0.609949	-0.574204	-3.96044e-05	0.142909	-0.20463	0.454173	-0.154322	651
2019-12-20	0.850167	0.327557	1.02444	-0.0220347	1.04249	-0.349768	-0.184325	0.0453605	0.00372352	0.475596	-0.000717555	0.116727	0.299734	0.190593	0.0157314	652
2019-12-23	-0.055882	-0.122155	-0.287118	1.63498	-0.0658034	-0.349034	0.307888	0.336804	-0.113701	-0.396939	-0.00221132	0.175402	1.10876	-1.32288	-1.67771	653
2019-12-27	-1.67613	0.10256	-1.61282	-2.35917	-1.69963	-1.37549	-0.88957	-0.236591	-0.252718	-0.01633	-0.00194269	2.09106	1.44032	1.96069	1.04479	654
2019-12-30	-0.270824	-1.02343	-0.82751	-0.672301	-1.3832	-0.589469	-0.475649	-0.0500016	0.670777	0.196504	9.64187e-05	0.181303	-0.0195589	0.380449	0.080774	655
2020-01-02	-1.07837	-0.704864	0.99689	0.167606	0.987292	0.476711	-1.1639	-0.971695	-0.633241	-0.426872	0.00430598	0.833245	0.299852	2.19731	0.869002	656
2020-01-03	-0.236394	-0.821366	-0.129255	0.506818	-0.373848	0.411326	0.028356	1.1186	0.875027	0.371793	-0.0019391	1.48358	0.881078	-0.252981	0.643549	657
2020-01-06	-0.380719	0.656254	-0.265149	-0.969525	-0.308609	0.681098	0.512873	1.17483	1.14894	1.88066	0.000231914	1.64977	0.697052	-0.00524772	0.796752	658
2020-01-07	0.932332	0.249492	0.960538	0.491944	0.635703	1.58701	-1.60481	1.058	-0.154178	-0.60964	-0.00343747	-0.418086	-0.940332	-1.38606	0.278673	659
2020-01-08	0.176709	0.781474	0.416883	0.235533	0.21817	-0.215469	0.0127738	-0.313834	-0.296094	-0.403768	-0.000447918	0.231928	0.839256	0.689065	1.44543	660
2020-01-09	1.14211	0.68154	0.22196	0.561893	-0.000958773	0.304931	-0.730471	-0.657681	-0.380301	-0.276353	0.00145695	-1.53539	-1.62265	-0.890298	0.305736	661
2020-01-10	-0.699604	0.0222838	-0.247252	0.12766	0.130447	-1.07291	-0.695163	0.906025	0.784165	0.538062	-0.00140004	0.147273	-0.00362187	0.691227	-0.180364	662
2020-01-13	-0.0384671	0.662533	-0.364016	1.05613	-0.505175	-0.19176	-1.34394	-0.256832	-0.173391	-0.102185	0.00159276	-0.31345	0.203094	0.496331	0.458963	663
2020-01-14	0.122592	0.165781	0.162989	-0.473217	-0.594509	0.123012	-0.466813	1.83488	2.40349	1.37682	-0.00712732	-0.39176	-0.706202	-0.318251	0.339418	664
2020-01-15	-0.289085	-0.201491	-0.577886	-0.158511	-0.927693	-0.14677	0.318784	-0.0777718	0.00552679	-0.0962537	0.00241801	0.222027	0.236902	2.51518	1.47513	665
2020-01-16	0.0331502	0.325277	0.572156	-0.621059	0.374422	0.348092	-0.693975	-0.281947	-0.244529	-0.29285	0.00159635	0.337261	0.489932	0.235163	1.65409	666
2020-01-17	0.569719	-0.0258433	0.749815	0.645164	0.748142	0.394088	-0.9599	0.419065	0.554307	0.538699	-0.00304035	0.160801	0.138729	-0.0652617	2.43126	667
2020-01-21	-0.109887	-0.360988	-0.0518503	-0.240119	-0.0230559	0.531067	2.41918	-0.505164	-0.11271	-0.137005	0.00377838	-0.495585	-0.257156	-1.34072	-0.76225	668
2020-01-22	1.19179	-0.0577952	0.222367	-1.20294	0.350739	0.373859	-0.055479	-0.188471	-0.159875	-0.0293474	-0.000175777	0.340189	-0.706202	0.544619	0.0792149	669
2020-01-23	0.157315	-0.89075	0.870929	0.438689	0.0648798	0.033565	1.69207	-0.761975	-0.572641	-0.673855	-0.00167474	0.366719	-0.568393	-0.127013	-0.260388	670
2020-01-24	0.0328668	-0.154341	0.302238	0.453344	0.328229	0.215541	-1.07247	0.0415529	-0.0585294	-0.252395	0.00186786	0.0445772	0.721729	0.721723	0.754253	671
2020-01-27	0.529745	-0.605247	0.144859	0.23652	-0.352241	1.52048	-0.00814309	1.04623	0.7448	0.481587	-0.00235616	1.04388	1.45036	-1.52967	-2.15184	672
2020-01-28	-0.0381274	0.328464	0.223873	0.796603	0.963629	0.0800854	-0.00814309	1.19473	0.497122	0.443874	0.00309362	-0.475401	-1.02704	-0.376848	-1.24018	673
2020-01-29	0.47554	-0.0580235	0.0858492	-0.213428	0.217725	0.19524	-0.00814309	-0.236968	-0.213014	-0.238176	-0.00235477	-0.0913144	-1.64657	0.118871	0.320118	674
2020-01-30	0.26258	-0.670689	-0.545192	-1.274	-1.18444	0.657391	-0.00814309	0.442452	0.970818	0.408625	-0.00126687	0.279342	0.807794	-0.628381	-0.00555417	675
2020-01-31	0.0680118	-0.430078	-0.975497	-1.19752	-1.01454	0.358612	-0.00814309	-0.423368	-0.463133	-0.24569	0.00105136	0.357604	0.493509	-0.952047	0.28178	676
2020-02-03	1.31868	0.119788	0.399317	2.56919	0.241685	0.243347	5.44813	-0.175507	0.863142	0.793429	0.000641803	-0.706283	-0.38786	0.438421	0.0838269	677
2020-02-04	-0.512708	1.29549	0.380354	-0.308767	0.857674	-1.03028	-1.19455	-0.297279	-0.108885	0.610492	-0.00194841	-1.19598	-0.148223	-0.131681	1.7424	678
2020-02-05	0.489798	0.50312	0.736006	0.401237	0.810616	-0.380556	-1.35467	0.937961	1.23933	0.48872	0.00091513	-0.40749	-0.374886	0.624316	0.656479	679
2020-02-06	-0.0378127	0.214069	0.540497	0.896046	0.480238	0.218441	-0.143592	0.31719	0.717266	0.246342	-0.0016767	0.64736	0.448365	0.182361	-0.394692	680
2020-02-07	0.208101	-0.153756	0.581487	0.37658	0.610013	1.35401	1.59835	0.0554616	0.761782	-0.216977	-0.000585741	0.597784	-0.00349181	-0.381045	-2.06213	681
2020-02-10	0.330663	-0.0898344	0.682496	-0.14615	0.0427321	0.104428	-0.958704	0.0299313	-0.0748153	-0.321819	0.00227997	-0.0149929	0.0286153	-0.257071	1.19213	682
2020-02-11	-0.423803	-0.00984328	-0.0130068	-0.35207	-0.34972	-0.893636	-0.893413	0.780927	0.974382	0.335515	0.00418006	-0.240674	-0.276959	-0.1948	-0.564822	683
2020-02-12	-0.988277	0.325788	0.485014	-0.447235	0.151843	-0.796599	0.294133	0.140563	1.89222	1.02998	-0.0026243	-0.526843	-0.489075	-0.131944	0.152511	684
2020-02-13	0.208881	-0.329483	0.906215	-0.991606	0.478453	0.379985	0.257443	-0.229011	0.166068	0.937275	-0.0024928	0.736321	0.239962	0.184698	1.18648	685
2020-02-14	-0.0731667	-0.0898344	0.187206	0.168713	0.672828	0.219092	0.512052	0.161339	0.965751	0.314803	0.00105125	0.386052	0.190437	0.435673	0.770341	686
2020-02-18	0.0854458	0.0221523	0.488458	0.305338	-0.0658564	0.590258	0.459396	-0.42919	-0.209362	-1.61735	0.00281974	0.528577	0.557968	0.49479	1.34222	687
2020-02-19	-0.425934	2.15209	0.42914	1.14203	0.562882	0.452897	0.126812	-1.28553	-1.46623	-1.08724	-0.00235385	0.927716	1.43034	1.53146	3.71735	688
2020-02-20	0.473446	1.06093	-0.0534773	0.79016	-0.152323	1.27347	1.28695	-0.0665091	-0.145036	-0.224748	0.00173046	0.949326	0.104796	-1.1696	-1.09804	689
2020-02-21	-0.743717	-0.214365	-1.157	-1.21884	-1.06519	-0.340071	0.146958	0.138972	0.462469	0.121858	0.000912558	1.57311	0.521332	-0.62711	-0.279461	690
2020-02-24	1.14319	-1.8905	-0.0331293	0.595587	-0.0879731	0.457179	0.152058	-0.10041	0.00132452	-0.221999	-0.00180844	1.81403	0.638025	-0.759949	-0.41987	691
2020-02-25	0.0500798	-0.550877	-0.213102	-1.1052	-0.218872	0.340846	-0.825391	-0.859819	-1.25534	-0.933545	0.00118522	-1.45634	-1.38909	-0.258904	0.102263	692
2020-02-26	0.629408	0.181176	-0.372575	1.14317	-0.109978	0.956345	0.436916	-1.31926	-1.64562	-1.32304	0.000912273	-1.07661	-0.819412	-2.66791	0.605172	693
2020-02-27	0.610215	-0.36038	-1.78164	0.625248	-0.875861	-0.626574	-0.929917	-0.00412358	0.206827	0.48619	-0.000855458	1.08267	-0.0985824	-0.471694	0.67083	694
2020-02-28	0.957198	-3.29298	-0.467571	1.36302	-1.01177	2.05461	-0.68283	-0.357729	-0.0770253	-0.106602	0.00213492	-2.87453	-2.8234	-2.81132	-0.545767	695
2020-03-02	-1.34759	-0.188367	-3.18838	-0.17548	-2.05962	-0.703768	-1.62731	0.473378	0.328117	0.130837	-0.00153422	-0.747015	-0.923713	-0.993763	-3.07827	696
2020-03-03	0.312421	-1.23322	-0.207055	-0.494245	-0.290672	-2.21013	-0.0916397	-0.411249	-0.615938	-0.3233	0.00240528	1.02314	-0.375078	0.349635	-0.877504	697
2020-03-04	1.27086	0.0723618	0.883475	-0.119417	-0.179621	0.175999	-1.76078	-0.059191	0.000119034	-0.00442388	-0.0012615	1.71299	1.45566	1.04718	-0.456976	698
2020-03-05	-0.385745	-1.30681	-1.39394	-1.41513	-1.47813	0.199756	0.63111	0.704403	0.268475	0.224722	0.000232022	1.12065	-0.18529	-0.775248	0.644918	699
2020-03-06	0.293396	-2.09836	-2.25037	-0.967285	-2.73611	-0.809881	-0.364309	0.131757	1.13246	0.278213	0.00145337	1.5174	0.902402	2.00416	1.44137	700
2020-03-09	1.85224	-4.74185	-1.923	-1.21994	-1.55431	-0.479384	0.777053	-3.18644	-3.18973	-2.0876	-0.00139679	-0.778496	-1.99684	-1.73353	-1.33681	701
2020-03-10	4.24076	2.00115	1.4958	2.28535	0.798617	4.34319	0.519601	-0.167764	-0.223037	0.10423	-0.000175397	-1.15522	0.602593	-0.0754078	-0.906408	702
2020-03-11	-0.460935	1.82727	1.1977	0.638462	1.18216	-1.01678	0.231962	0.0730331	-0.540047	-0.255474	0.00118204	-0.181805	-0.187041	0.692749	-0.961125	703
2020-03-12	2.04406	1.40946	3.87372	4.84193	3.60108	5.62206	3.559	-11.1061	-9.91405	-5.67752	0.0137298	-5.67764	-1.70469	-5.06774	-6.31936	704
2020-03-13	2.04297	2.41708	0.301172	1.92867	0.0432733	2.95924	-1.05855	3.19435	3.59638	2.02894	-0.00893329	-0.603591	-2.68958	-2.07599	-6.44413	705
2020-03-16	-0.286647	-2.51863	-1.42152	1.84837	-1.63762	0.720872	-0.869359	-2.37449	-3.18423	-1.61616	-0.00315261	-5.42916	-11.2019	-8.80105	-4.6638	706
2020-03-17	3.54715	2.89262	3.30838	3.82379	4.03303	3.99025	0.599071	0.948385	0.711237	0.553763	0.00131475	3.44882	-2.37964	-2.39427	1.16463	707
2020-03-18	5.54466	1.66661	2.75688	3.84718	1.78012	4.09612	2.20966	0.369555	0.212334	-0.00478476	-0.00139396	-2.7874	-0.111425	-1.90881	-0.108231	708
2020-03-19	-1.06612	2.59437	2.7109	1.49241	2.63277	-1.04911	3.06603	3.08	2.3087	1.43652	-0.00329555	-1.81231	-1.95991	-3.79431	2.75257	709
2020-03-20	-1.62323	1.91004	0.352357	-1.22486	0.431563	0.465983	-0.560498	0.0693222	-0.295923	-0.679702	-0.00248668	1.42876	2.87808	2.11773	-1.82357	710
2020-03-23	2.84204	0.0688157	-1.57367	3.84501	-0.887796	2.29175	-0.264148	0.874621	0.303221	0.124265	0.00457897	2.18814	-0.564618	0.882461	0.369522	711
2020-03-24	-0.952441	0.100289	-0.678488	-4.45396	-0.2177	-4.58548	-1.49654	0.877595	0.284532	0.281429	-0.00112492	5.5506	4.85505	5.69324	6.96063	712
2020-03-25	-2.38598	-0.0416049	-0.81673	0.322221	-0.674821	-0.795985	2.49808	-0.26794	-0.343923	-0.0798855	-0.00153333	-0.0735599	1.3877	3.29308	1.84294	713
2020-03-26	-4.74371	-3.17485	-3.76966	-5.60116	-2.96168	-2.5204	-2.00558	0.102953	0.249333	1.09453	0.00226818	1.92446	1.7912	1.66164	4.22717	714
2020-03-27	0.495702	-2.10826	-0.662039	-3.1865	-1.9092	-1.84802	1.18652	-1.2445	-0.856829	-0.266669	-0.00166823	-1.22801	-0.417016	-0.00524772	-0.259975	715
2020-03-30	1.55205	-0.188307	0.813804	-0.454281	1.08801	-0.492817	0.217017	0.0110025	0.0192983	-0.161877	0.000367733	0.0143124	-1.06609	-1.33509	-0.206568	716
2020-03-31	-0.762197	-0.88942	0.0463321	-0.881708	0.486113	0.139835	-0.91988	0.0243596	0.05702	0.16601	-0.000718568	-0.685695	-0.529608	0.0787223	1.16823	717
2020-04-01	1.62891	-0.811631	1.63006	0.863494	1.08039	0.799777	0.918941	0.71976	0.31673	0.0731535	0.00091085	-2.27384	0.327769	-1.10598	-1.2894	718
2020-04-02	-1.84935	1.28186	1.44218	0.206092	1.16276	1.5215	-0.684015	0.485723	0.649845	0.228968	-0.002349	2.69881	0.628558	1.09548	-2.13541	719
2020-04-03	0.361224	1.0781	1.31083	2.20072	1.1131	1.17405	0.253138	-0.262512	-0.0517621	0.05493	-3.96044e-05	-0.303264	0.839923	-1.10598	0.32201	720
2020-04-06	-0.118394	0.910302	-0.214324	-1.00922	-0.175229	-2.45121	-0.0747264	1.83586	3.18919	1.27702	-0.000583561	2.30328	0.631378	1.59689	-0.585384	721
2020-04-07	-2.56319	-0.251353	-1.55531	-0.64387	-1.31347	-2.31311	-2.30504	-0.500872	-0.666704	-0.380381	-0.0012643	0.00973432	1.98464	0.656948	1.24056	722
2020-04-08	0.731776	-0.461574	0.446379	-0.727562	0.0867687	-0.912925	1.02649	0.487713	0.790139	0.581063	0.000913033	-0.14918	-0.0574451	-0.00524772	0.0887527	723
2020-04-09	-0.586702	-0.543668	-1.32878	-0.910098	-1.07876	-2.14345	-1.14588	-0.269446	-0.357503	-0.268601	-0.000175655	2.10165	0.395813	-0.50122	-0.270161	724
2020-04-14	-1.2927	-2.14535	-0.786626	-2.24859	-1.17315	-2.69635	0.254729	-1.42843	-1.1803	-0.869785	0.000640511	3.85439	1.22714	2.11543	0.428261	725
2020-04-15	3.36652	0.530964	1.23809	1.33423	0.928187	2.20558	0.943819	-0.782005	-0.630288	-0.430452	0.000504244	-1.52002	0.200883	1.34253	-0.705692	726
2020-04-16	0.592709	0.463995	1.38535	1.28706	1.07819	0.652186	0.577231	1.43028	1.97001	0.683748	-0.000175546	0.633822	-0.276824	0.928508	-0.25441	727
2020-04-17	-1.90992	-0.352251	-0.853169	-0.992538	-0.705348	-1.38605	-0.352065	-0.207118	-0.196967	-0.156472	-0.00017556	-2.41064	-1.28589	-0.782382	0.281453	728
2020-04-20	0.679094	0.251642	0.186626	0.517673	0.197245	-0.743071	0.0432092	-0.698931	-0.0553797	-0.526145	-0.000855621	-0.463481	-0.0572326	-0.0835084	-0.0818936	729
2020-04-21	2.17886	-0.0258433	0.406831	2.89383	0.483038	2.63668	0.981536	-0.0210457	0.00553583	0.099823	0.000776412	-0.32216	-0.701971	-5.23505	-6.17774	730
2020-04-22	-1.10742	0.169765	0.507852	-0.94845	0.460103	-1.02268	-0.433426	0.811359	1.09874	0.29579	-0.000583561	1.78094	-0.248854	4.03843	2.26173	731
2020-04-23	-1.72792	-0.286702	0.287936	-0.527177	0.4592	-1.67396	-0.916738	1.09375	0.216658	0.289457	-0.0012643	1.57474	1.47332	0.0745485	0.723221	732
2020-04-24	1.15995	-0.36881	0.348649	0.494415	0.436453	0.255783	0.808156	-0.00492989	0.157701	0.00966475	0.000504841	-1.34017	0.0177334	-0.164945	0.302862	733
2020-04-27	-0.932306	-0.385861	-0.615903	-1.22952	0.151991	-2.02021	0.171299	0.713287	0.71503	0.268388	-0.0003118	-0.113617	-0.43112	0.074653	-1.29562	734
2020-04-28	-0.835841	-0.665877	-0.133491	-0.237833	-0.263086	-0.946659	-0.377378	-0.105055	0.00221846	1.07078	9.65002e-05	-1.55291	-0.245303	0.866822	-1.1849	735
2020-04-29	-0.939363	-0.289097	-0.333664	0.133873	0.130234	-0.893551	-0.115907	2.7098	1.50194	0.688516	-0.000992623	0.705692	0.0557885	0.387064	0.940617	736
2020-04-30	-0.422053	0.418169	-1.60847	-2.45136	-1.71239	0.297328	-0.691394	-0.41294	-0.762648	-0.937118	-0.000175804	-0.0916222	0.616911	-1.03055	1.12663	737
2020-05-01	3.18247	-0.321727	-1.261	1.32161	-1.5268	2.36326	-0.00814309	0.440469	0.430466	0.366145	-0.000175818	-1.11613	-1.87368	-0.164528	-1.09525	738
2020-05-04	-0.234667	0.07284	1.73225	1.13115	1.08347	0.278501	-0.00814309	0.0831163	-0.464354	-0.0172514	-3.96044e-05	1.41614	0.306422	-0.00524772	-0.842226	739
2020-05-05	-1.04952	-0.519815	1.34502	-0.266211	1.64869	-1.12207	-0.00814309	0.263865	-0.134471	-0.09238	9.66091e-05	-0.664843	-0.712088	-0.325061	-2.80818	740
2020-05-06	1.95427	-0.769415	0.769512	1.46734	0.546202	1.04987	2.08889	0.318113	-0.556615	-0.346819	0.000368954	-0.571444	1.2248	-1.30153	0.341035	741
2020-05-07	-2.84393	0.453708	-0.173968	-0.0235518	0.0428036	-2.0804	-1.06284	1.87629	1.02434	0.391039	9.65546e-05	0.75377	-0.380497	1.05007	0.565673	742
2020-05-11	0.865002	2.17317	-0.0533601	0.278876	-0.504256	0.658572	0.744792	-3.41082	-2.22901	-1.69491	-0.000720536	-0.136474	1.72578	-0.0857813	0.445776	743
2020-05-12	-0.25263	-0.630287	-0.914913	0.45261	-0.901285	-0.897219	-0.807227	0.547929	0.313281	0.256051	9.66091e-05	-0.0756039	0.128115	0.795344	0.106508	744
2020-05-13	1.32737	-0.698071	0.54748	1.07774	0.548424	1.08958	0.478688	1.14038	0.805696	0.285715	0.000368954	0.330895	0.256305	0.0742366	-0.117616	745
2020-05-14	-0.0524108	0.253198	0.749889	0.456457	0.525223	0.976483	0.114743	1.06802	0.276707	0.121773	-0.000993099	1.41928	-0.129745	-0.80479	-1.02811	746
2020-05-15	0.0636468	0.269129	-0.314713	0.955085	-0.000954269	0.278592	0.390948	-1.12254	-0.744205	-0.418853	-0.000448449	0.182986	2.56792	0.794295	1.24082	747
2020-05-18	-2.06732	-0.0585935	-1.75349	-1.19221	-0.571214	-2.48758	0.364969	0.913206	1.60623	0.452628	-0.000448572	-0.0940593	3.72011	3.54341	3.41898	748
2020-05-19	-1.46223	1.01915	-0.649588	-0.633985	0.591204	-1.29422	-0.550048	0.0468119	-0.0608761	-0.0560742	0.00064194	0.151163	-0.781492	0.665544	0.666581	749
2020-05-20	0.53524	-0.727261	-0.845556	-0.0237678	-1.65027	-0.813881	-0.274279	-0.652111	-0.389665	-0.237315	-0.00044849	0.595001	1.13591	1.53183	0.992323	750
2020-05-21	0.584254	0.349682	0.541762	0.440743	1.20974	0.908414	1.06544	-1.13586	-0.954679	-0.528832	-0.000312263	-1.5241	-0.892253	0.498625	-0.104258	751
2020-05-22	1.25008	-0.336002	1.18028	0.718868	0.437651	0.794902	0.659966	0.219726	0.677109	0.379857	0.00064194	0.492893	-0.703933	-1.16313	-3.36054	752
2020-05-26	-3.35839	0.202748	-1.50342	-2.30008	-1.16551	-2.74735	0.353449	-0.858128	-0.55401	-0.474662	0.000369159	-0.893898	0.979204	-0.224819	0.50597	753
2020-05-27	-0.59491	0.218746	0.0266984	1.53878	0.636973	1.25554	1.72352	0.828681	0.555406	0.258757	-0.000448367	-1.6931	-0.383746	-1.0405	-0.0691474	754
2020-05-28	-0.392676	-0.221488	-1.96467	-1.35537	-1.16871	-1.7461	-1.19555	0.833604	0.906392	0.137853	-0.000312181	1.40259	0.476487	0.218075	-0.346391	755
2020-05-29	0.776689	0.137209	-0.737635	0.0773437	-0.509928	0.501681	-0.511678	-0.395326	0.00371831	-0.220509	-0.000448572	0.665918	0.797725	0.29125	-0.00555417	756
2020-06-01	-3.51328	-0.368428	-0.30583	-2.17396	-0.0898195	-3.32006	-0.441029	1.6837	1.92265	0.838641	0.00268453	0.06675	1.80123	0.436814	0.101262	757
2020-06-02	-1.51859	1.66426	-0.831329	-0.833492	0.242419	-1.9906	-1.39174	-1.54312	-0.724708	-0.524387	-0.00221848	0.672963	0.325234	1.01394	0.901771	758
2020-06-03	-0.452444	0.42642	-1.54404	-0.970653	-0.200527	-1.72003	0.62049	0.273085	0.424364	0.0331069	-0.0001759	-2.38373	-1.31542	-1.3926	-0.277754	759
2020-06-04	0.412535	0.167628	-1.4563	-0.107567	-1.04534	0.0775566	-0.212457	0.240319	-0.111777	-0.0106621	-3.96044e-05	-0.392953	-0.372292	0.582749	-0.854589	760
2020-06-05	-1.61572	1.06649	0.487122	-1.32883	1.28657	-0.881687	-1.37489	-0.423882	-0.250399	-0.130036	-0.000448572	-1.12431	-0.569015	-0.815213	0.208356	761
2020-06-08	-0.717354	-1.99048	0.083829	0.131189	-1.20014	-0.278535	-0.56245	0.285781	0.377233	0.0540635	0.000914462	0.393348	0.142595	1.0966	1.46141	762
2020-06-09	0.938164	-1.32616	-1.04858	-0.581799	-1.76778	0.677921	0.325569	-0.0710086	-0.194202	-0.208492	9.66363e-05	1.43171	-0.0195589	-0.370325	-0.732487	763
2020-06-10	-0.786436	-0.696006	-0.127073	-0.301488	-0.811445	-0.901371	-0.861001	0.19864	0.237216	0.0618832	0.000232836	0.490178	0.255051	0.359829	0.203457	764
2020-06-11	2.96175	-0.978267	-0.432701	1.72692	-1.51739	2.55927	0.202689	-1.43284	-1.22897	-1.00173	-0.00208424	0.968968	0.493798	-1.32988	-1.16851	765
2020-06-12	0.479167	1.10663	2.40679	1.53083	3.01943	0.779169	0.941653	0.38464	0.456137	0.296464	0.000642281	-0.351872	-0.82372	0.143362	0.421157	766
2020-06-15	0.529635	-0.0749298	-0.321053	-0.22161	-0.247869	0.0561129	0.309612	-0.147278	-0.505715	-0.0716619	0.0010507	-1.51441	-1.79619	-1.966	-0.755234	767
2020-06-16	-0.965141	0.00688262	0.219038	-0.602975	-0.180888	-0.803272	-0.177236	0.179894	0.285657	-0.0296083	-0.000312099	0.545109	1.05632	2.02967	1.10338	768
2020-06-17	0.135068	-0.173158	0.78008	0.854471	0.424423	-0.259772	-0.0799033	-0.188237	-0.138488	0.026222	-0.000448449	0.232087	0.176867	-0.302467	-1.04969	769
2020-06-18	0.392877	-0.813614	0.0649939	1.37251	-0.023847	1.11811	0.140487	-0.230739	-0.215769	-0.264168	-0.000584922	-0.360631	0.452366	-0.37882	0.338315	770
2020-06-19	0.134754	0.155	0.530494	0.980126	0.22244	-0.215885	-0.839204	-0.226485	-0.195099	-0.205135	-0.000175968	0.910713	-0.312018	0.442766	-0.674436	771
2020-06-22	-0.983591	-0.108022	-1.36729	-1.21255	-0.965954	-1.09541	-0.157114	0.815106	0.97083	0.12275	0.00145964	1.63897	1.06153	-0.00524772	0.12476	772
2020-06-23	-0.607038	-0.684658	-1.18603	-1.19008	-0.812501	-1.1549	-0.537742	-0.18641	-0.0362203	-0.0668661	0.000232809	0.382775	-0.179622	0.143362	0.767765	773
2020-06-24	1.58262	0.616531	0.968414	1.41484	0.764448	1.78487	0.993843	-0.808282	-0.625395	-0.410061	-0.00126589	-0.229184	0.124518	-0.827117	-0.433377	774
2020-06-25	1.00835	0.597808	0.992049	0.377295	0.335589	0.14633	-0.0184059	-0.180951	-0.189847	-0.170907	0.000233	-0.641958	-1.06838	-1.06754	-1.62842	775
2020-06-26	0.595024	-0.0586119	0.123089	0.996422	-0.0913731	0.146492	-0.00814309	-0.261675	-0.242332	0.039664	-3.96044e-05	-0.61079	0.949262	0.147645	0.239777	776
2020-06-29	-0.156218	0.82416	-0.41885	0.842704	0.559538	0.214645	0.12525	0.0112563	-0.164632	-0.414613	-0.000312208	1.43577	0.220099	0.979323	1.26432	777
2020-06-30	-1.23469	0.0719699	0.00689386	-1.29261	-0.809953	-0.961068	-0.742413	-0.17166	-0.198326	-0.1737	0.000505549	-0.269039	-0.211205	0.144824	-0.00555417	778
2020-07-01	-0.603927	-0.466432	-0.418018	-1.49703	-0.249232	-0.551679	0.259036	0.178493	0.35777	0.0571393	0.000232891	0.128817	1.16781	0.665544	0.31657	779
2020-07-02	0.203649	0.0558307	0.431805	0.0764821	0.020946	-0.101664	-0.229066	-0.401861	-0.364747	-0.154582	-0.000175845	0.340602	-0.951541	-0.75103	-0.327678	780
2020-07-06	-0.77731	-0.107517	-1.34222	-0.179956	-0.859508	-1.17438	-2.5921	0.5625	1.05192	0.993502	0.000641463	0.586745	1.02199	1.03631	0.423386	781
2020-07-07	0.703215	0.0231656	0.160655	-1.27158	-0.114832	0.0103949	-0.173813	-0.248783	-0.193802	-0.286254	-0.000175791	0.0475328	-0.759319	0.215649	-0.11237	782
2020-07-08	-0.829287	-0.254669	-0.569151	-0.291374	-0.613832	0.0995386	-0.453755	0.363519	0.500785	1.35564	0.000505059	1.25353	1.43506	1.01516	0.420052	783
2020-07-09	0.651975	-0.222217	0.602167	-0.29088	0.361241	0.188874	-0.620455	-0.512948	-0.373427	-0.212536	-3.96044e-05	0.007094	1.05138	0.856002	0.624698	784
2020-07-10	0.238053	-0.846438	-0.37734	-0.55743	-0.0243952	-0.0341977	0.339652	0.0682934	-0.0854828	-0.268443	-0.000584268	-0.596681	-0.216934	-1.52051	-0.551212	785
2020-07-13	-0.398276	0.712864	-0.874273	0.567896	0.36077	-0.546569	-0.169022	-0.1499	-0.139389	-0.0456004	-0.00072074	0.212894	0.960563	0.721001	0.975595	786
2020-07-14	0.650578	-0.0586088	-0.79454	0.965867	-0.545729	0.277516	0.515749	-0.0267494	0.0209648	-0.00217554	-3.96044e-05	-0.391895	-0.620717	-1.61456	-0.274599	787
2020-07-15	-1.46642	-0.485204	0.00689386	-0.560475	1.24308	-0.745447	-0.916357	-0.182122	-0.16429	-0.154282	-0.000584758	0.110285	1.27997	0.731527	-0.443923	788
2020-07-16	0.308066	0.187581	-0.506757	-0.488288	-0.137084	-0.122724	-0.0289288	-0.204072	-0.385503	-0.21958	0.000778044	0.134198	-0.271175	-0.816192	0.722483	789
2020-07-17	0.565942	-0.00943676	-0.0880935	1.00781	-0.975079	0.298687	0.152915	-0.000472703	-0.0974511	-0.0234437	0.000232836	-0.074301	-0.272288	0.143001	0.628675	790
2020-07-20	-0.709338	0.22007	-0.0690661	-1.51758	0.0436347	-0.344604	-0.439525	-0.034287	0.206708	-0.0138872	0.000368954	0.447001	0.808769	1.52999	0.338135	791
2020-07-21	-1.52668	-0.665936	-0.997077	-1.08652	-1.09365	-2.2557	-0.158988	0.488823	0.623537	0.29406	0.000913223	1.55228	3.16468	1.98342	2.34198	792
2020-07-22	-0.629006	0.565095	-1.72491	0.102937	-1.16831	-0.796139	0.968634	0.247057	1.13693	0.241464	0.000640579	0.528847	4.49165	1.30821	-0.349243	793
2020-07-23	-0.648159	-0.600339	-0.667027	-0.413121	-0.852342	0.227336	0.230456	0.149532	0.7178	0.291016	-0.00153646	1.46256	1.53749	0.944781	-0.313489	794
2020-07-24	0.956195	-1.74409	-0.217283	-0.439929	-0.624828	0.904892	0.686014	-0.173861	0.208328	-0.318129	0.00104918	1.32134	-0.989313	1.26086	1.11869	795
2020-07-27	-0.73454	-0.857945	-2.12981	-1.3236	-0.395231	-0.885117	-1.13812	3.14678	2.33912	1.23339	-0.000447796	1.91188	4.61391	0.192284	2.17246	796
2020-07-28	-0.334509	-0.460099	0.321434	-0.861445	-0.790622	-0.598551	0.240962	-0.282051	-0.28674	0.327103	0.000368587	0.186132	-1.99757	0.972927	-0.670461	797
2020-07-29	0.102171	0.024318	-0.677112	-0.323822	-0.630542	-0.163618	0.0748538	0.348416	0.0126327	0.689056	-0.000719992	0.507824	1.86468	-0.199632	-0.958596	798
2020-07-30	1.21702	-0.0425621	-0.38037	-0.828382	-0.468981	0.617722	0.334019	-0.0697344	0.842961	0.02521	0.000504733	0.32388	-2.84511	-3.33964	-3.08489	799
2020-07-31	-0.977915	1.19047	-0.563522	-1.32588	-0.142614	-0.446359	-1.75342	0.419944	0.53984	0.779325	-0.00072006	0.350363	2.18084	1.01434	0.193818	800
2020-08-03	0.41579	0.521244	1.33404	1.09111	1.90593	1.12031	0.278118	-0.265167	1.76718	2.33814	-0.00140154	-0.406516	0.358708	0.26379	1.07402	801
2020-08-04	-0.735469	-0.423556	-0.288729	-0.0764384	-0.907824	-0.9487	-0.419388	-0.129083	0.13234	-0.409044	-0.000584758	1.02004	0.215592	0.128828	-0.375299	802
2020-08-05	-1.96812	-0.740672	-2.41676	-1.1072	-2.34238	-1.43889	-1.92474	1.01769	0.440906	0.0245893	0.000778044	3.75674	5.80908	3.50769	1.47272	803
2020-08-06	0.542994	0.107369	0.775129	-0.0758916	1.14738	-0.269932	0.865243	-0.00866688	-0.283852	0.00117103	-0.000448367	0.95483	1.93828	0.686204	0.815885	804
2020-08-07	1.88846	0.638704	1.47776	1.41666	0.931809	1.39107	0.774548	-0.364724	-0.69332	-0.416022	-0.000584812	-1.971	0.884384	0.181978	-1.35841	805
2020-08-10	-0.753787	-0.141958	0.376171	-0.525367	0.346975	0.00980407	-0.3158	0.512516	0.657454	-0.0192047	0.00118681	0.661972	-0.140607	0.42939	1.31032	806
2020-08-11	-0.949367	1.14835	-0.140892	0.0731701	0.230273	0.139987	-0.843782	-1.00319	-0.747747	-0.567089	-0.00167507	-5.80009	0.000633647	-2.66077	-2.03438	807
2020-08-12	-0.812153	0.451506	-0.583247	0.413402	-1.23811	-0.27213	-0.468566	0.272904	0.322031	-0.0573761	0.00200442	-0.490202	-5.23758	-0.264289	0.935989	808
2020-08-13	-0.638141	0.0398963	-0.3979	-0.470874	-0.259858	0.139881	0.394759	0.357033	1.50445	0.5267	0.000777146	0.642454	0.945565	0.51174	0.522935	809
2020-08-14	0.6328	-0.684349	-0.26867	-0.347622	-0.119595	-0.185307	0.310722	-0.0883046	0.500522	0.22706	-0.00126491	-0.0250939	0.9616	0.251612	-0.839119	810
2020-08-17	-0.85035	-0.885608	-0.653038	0.0459113	-0.753691	-0.940752	-0.965579	0.933759	-0.321028	0.622886	0.00132178	1.51285	0.427659	-0.133543	1.05244	811
2020-08-18	-0.3745	-0.956475	-1.07034	-1.65499	-0.662129	-0.527914	-0.54814	-0.665111	-0.36295	-0.569533	-0.000856273	1.91541	2.89575	0.442609	-0.136323	812
2020-08-19	-0.144476	0.473323	0.553975	0.503021	2.01689	0.00958827	-0.128835	-0.420707	-0.627535	-0.600776	0.000232673	-1.5717	-1.83191	-0.710507	-0.570755	813
2020-08-20	0.0682425	0.140231	0.665214	0.018706	-0.728277	1.19505	-0.265402	0.150669	0.317668	0.0804535	9.65138e-05	-3.06162	-1.12251	-1.97118	-0.0435122	814
2020-08-21	0.422357	0.0903151	1.60612	1.24915	1.16712	0.464849	0.180882	-0.673422	-1.20293	-0.631092	-0.0018102	-0.211883	-0.157609	-1.08024	0.503943	815
2020-08-24	0.333262	0.00733075	-0.509085	0.276805	-0.492902	-0.402038	-0.00289381	0.378073	0.797627	0.409901	0.000914081	1.05306	0.0548174	1.99507	0.0881075	816
2020-08-25	-0.515605	0.801477	-0.26902	-0.781186	-0.447266	-0.141715	-0.34425	-0.876384	-1.07136	-0.600276	-3.96044e-05	-1.91076	-0.853851	-0.00524772	-0.608713	817
2020-08-26	-0.818608	-0.472112	0.0988263	-0.669933	-0.0493747	-0.917701	-1.38206	0.218004	0.087493	-0.0253431	0.000505059	1.18497	-0.235458	-0.930573	0.240548	818
2020-08-27	-0.607592	0.453437	-0.195306	-0.573365	-0.190155	-0.826905	0.360851	-0.313516	-0.15698	-0.613824	-0.000448082	-0.568294	1.79007	0.920078	-0.156827	819
2020-08-28	-0.0917621	-1.88413	-1.40326	-1.49303	-0.825558	-1.96756	-1.47579	0.338813	0.484081	0.325143	0.000232727	1.83132	0.200056	-0.00524772	0.145719	820
2020-09-01	-1.12814	1.13789	-0.867555	-0.991052	0.750081	-0.496977	-1.99733	0.684767	3.08145	1.08489	-0.000311936	0.780204	3.09814	1.67684	2.57306	821
2020-09-02	0.319446	0.222528	1.99772	1.3482	0.841175	1.17189	0.539307	-1.00654	-1.37872	-0.930761	0.000232727	-1.46248	-2.40094	-2.34685	-1.01039	822
2020-09-03	1.2458	-0.0423904	0.153731	0.700642	-0.0492357	0.98865	0.51727	-2.61718	-2.36785	-1.65029	0.00104918	-0.423824	-1.70308	-1.48177	1.6325	823
2020-09-04	-0.643908	0.304804	0.227336	0.447966	1.02468	0.159068	-0.353026	0.603966	0.140502	0.491236	-3.96044e-05	-0.852104	-0.200255	0.333477	-1.12018	824
2020-09-08	1.75651	-0.638031	0.577407	2.58961	0.462955	0.71675	0.129849	-0.797038	-2.28231	-0.978845	-0.00112839	-0.926523	-0.318428	-0.140512	0.173403	825
2020-09-09	-0.552103	0.404565	-0.379746	0.387273	-0.793993	-0.975511	-0.68268	0.163814	0.631253	0.113717	-0.000311936	1.99821	-0.32	1.002	-0.544782	826
2020-09-10	-0.0204159	-0.0919913	-1.27696	2.27338	-1.24254	-0.267841	0.135367	0.19857	0.751414	0.19665	-0.000175791	1.00961	1.1939	0.920078	0.72963	827
2020-09-11	0.369695	-0.0589266	0.904794	0.809446	0.372666	0.201393	-0.0347148	0.058014	0.229345	-0.0583203	0.000232754	-1.10473	-0.506102	-0.0708789	-0.183658	828
2020-09-14	-0.197645	-0.838339	-0.781258	-1.21353	-0.471624	-0.480692	-1.33921	0.551521	0.100323	0.142128	-0.000311963	0.578431	0.00168159	1.16544	0.667169	829
2020-09-15	0.475613	-0.325258	0.519784	0.143308	0.349453	0.0519668	-1.40301	0.177608	-0.607041	-0.158109	-0.000312018	-0.575505	1.36513	1.77232	0.064622	830
2020-09-16	-0.622856	-0.960632	0.208718	-1.5625	-0.0963197	-0.861006	-1.5643	0.28562	0.00722967	0.157779	0.000913604	0.641811	-0.362595	-0.256036	1.10126	831
2020-09-17	0.705979	-0.310606	0.22728	0.347853	0.442801	0.986324	0.523847	-0.0669638	1.03864	0.256798	-0.000311882	-1.4842	-1.3593	-1.98463	-1.11237	832
2020-09-18	-0.445325	-0.579939	-0.616954	0.0738362	-0.0258855	-0.479922	0.244146	-0.0671797	-0.239554	-0.106465	-0.000584322	0.76687	0.648965	-0.0701804	-0.393016	833
2020-09-21	2.11446	0.394086	2.21675	2.15907	1.58422	2.10551	1.96119	-1.12561	-2.01697	-1.12066	0.000368954	-2.4004	-1.51594	-2.12045	-0.0941257	834
2020-09-22	0.243082	0.577097	0.637129	0.952316	0.879357	0.830235	-1.41984	0.193159	0.100737	0.0932495	-0.000175777	-0.244859	-4.66541	-1.98763	-0.61296	835
2020-09-23	1.04764	0.458358	0.490075	-0.329608	0.783648	1.72996	1.64897	-0.680221	-1.24882	-0.700922	-0.000448204	-1.93641	-1.70051	-1.83904	-0.676924	836
2020-09-24	-0.0550742	0.107495	0.211641	0.158623	0.734944	1.02064	0.97187	1.01422	1.43179	0.631913	0.000505168	-0.734123	-3.44763	-1.52771	-0.613746	837
2020-09-25	0.677658	0.257165	0.902599	0.4662	0.640871	0.739348	-0.290158	-0.155307	0.0848768	0.466026	0.000777146	-0.17343	1.02434	0.724476	-0.154361	838
2020-09-28	-0.560743	-0.175614	-0.77705	-2.20488	-0.99023	-1.22529	-0.615485	-0.0411577	0.0835833	-0.0590675	-0.000720196	0.216518	0.63267	1.49934	0.970391	839
2020-09-29	0.590237	0.273571	-1.05253	0.254059	-0.717482	-0.932142	0.22639	0.254679	0.238576	0.0679126	-0.000175763	1.0914	2.2902	1.2555	0.320692	840
2020-09-30	-1.54036	-0.192122	-0.104324	-1.0155	-0.6041	-1.12206	-1.36413	-0.183599	-0.0546769	-0.0830788	-0.000175777	0.117636	-0.283663	0.271416	1.06359	841
2020-10-01	-0.5995	-0.109041	-0.529858	0.280528	-0.187811	-0.639637	0.00255378	-0.373673	-0.330096	-0.220896	9.65682e-05	0.816935	-0.272803	0.953312	-0.0231471	842
2020-10-02	0.541558	-0.309012	0.858911	-0.366315	0.600322	0.898113	-0.00814309	-0.151438	-0.387259	-0.273628	0.0002327	0.00708307	0.569607	-0.482645	-0.394517	843
2020-10-05	-0.898689	0.540039	-1.43587	-0.598593	-1.16266	-0.74895	-0.01884	0.401816	0.331672	0.872205	-0.00017575	0.321911	0.0999356	-0.210996	0.733842	844
2020-10-06	0.102922	-0.125572	0.117536	0.375519	0.020946	0.681738	-0.00814309	-0.438805	-0.644831	-0.276314	-0.000720536	0.163848	0.892267	-0.696129	0.272656	845
2020-10-07	0.138045	0.521968	0.228347	0.43133	0.369748	0.18376	-0.00814309	0.0924514	0.00997452	0.135719	0.000232809	-1.71453	-1.85801	-0.704044	-0.214035	846
2020-10-08	-1.07778	-0.00926956	0.247057	-0.407135	0.20674	-0.402911	-0.00814309	0.471068	0.419908	0.0999017	0.000913414	0.117586	1.0144	0.205233	0.719545	847
2020-10-09	-1.81152	-0.457268	-1.20966	-0.802977	-1.68046	-1.71653	-5.19564	0.212906	0.643625	0.0656204	-0.000175709	1.99797	0.820168	1.44813	0.841292	848
2020-10-13	0.317557	-0.308503	1.51939	0.484236	1.04808	1.54097	2.79681	0.680889	0.683447	0.162164	-0.000311855	-1.88185	1.41802	-1.59886	-2.06811	849
2020-10-14	0.157279	-0.80969	-0.326021	-0.746908	-0.445319	-0.0985568	-1.7134	-0.0569257	-0.124459	-0.419243	9.65274e-05	1.02372	-1.78683	0.27491	0.485056	850
2020-10-15	1.69668	0.474888	1.00717	1.45767	0.39404	1.95017	0.516157	0.109915	-0.108083	-0.203793	-0.000584213	-1.09542	-0.589203	-1.92177	-0.478541	851
2020-10-16	-0.868501	0.0241515	-0.289966	-0.18728	0.253798	-0.0996095	-1.47484	-0.40292	-0.587054	-0.337152	9.65682e-05	0.702964	0.985339	1.70127	-0.00555417	852
2020-10-19	-0.694102	-0.00918151	-1.30555	-0.913202	-1.40343	-0.165288	-0.871444	0.781077	0.598579	0.266097	-0.000311963	-0.0216521	1.09452	-0.145649	0.187802	853
2020-10-20	-0.624934	0.207255	-0.655553	0.649011	-0.471624	0.712666	-0.274606	0.250492	-0.518827	-0.155441	0.000368914	-0.466396	-0.504294	-0.00524772	0.169438	854
2020-10-21	0.175288	-1.66407	-0.836637	-2.6101	-0.661148	-1.39218	-1.37616	1.5605	0.975822	0.390109	0.00104918	1.41757	0.877412	1.79523	0.909658	855
2020-10-22	0.0329047	0.477279	0.850425	0.723337	0.773477	0.228244	1.72417	0.235803	0.91855	0.293904	-0.00126455	-1.37736	-0.259668	-1.66533	-0.746517	856
2020-10-23	0.263973	-0.19339	-0.360261	0.698989	-0.425549	-0.208371	0.209174	-0.119815	-0.258104	-0.156457	-0.000448163	0.101774	-0.375862	3.20444	0.547128	857
2020-10-26	1.18463	0.108207	0.521085	0.250736	0.443964	-0.0555101	1.39044	0.167781	-0.634575	-0.373315	0.000232782	-0.351758	-1.13727	-2.65654	-0.523475	858
2020-10-27	-1.03014	-0.730753	-0.323797	-0.621491	-0.143461	-0.512758	-0.414152	0.942027	0.347277	0.208962	-0.000856926	0.362923	0.343765	0.133556	-0.232031	859
2020-10-28	2.90851	-0.210931	1.53596	0.959822	0.748074	1.64939	1.2625	-0.675811	-0.668624	-0.410222	-3.96044e-05	-2.12044	-1.22383	-1.266	-2.26788	860
2020-10-29	0.767555	0.579174	1.73306	1.47437	1.7467	1.33448	-0.75918	0.24623	-0.0924639	-0.1927	-0.000175872	-0.0327333	-2.23355	-0.146953	-0.357775	861
2020-10-30	-0.580102	-0.277681	0.211974	-0.586629	-0.11846	-0.388269	-1.20545	0.118719	-0.222327	-0.221424	0.000777799	0.618893	1.47399	-0.575385	0.402006	862
2020-11-02	-1.35559	0.410446	0.249512	0.404179	0.832867	-0.497621	-0.116691	-0.0478485	0.0162342	-0.236129	-0.000448245	0.412804	0.820081	0.209179	-0.469005	863
2020-11-03	-2.18021	-0.52935	-1.66724	-1.99422	-1.69935	-2.50486	-0.76889	0.688932	0.157954	0.211331	9.66227e-05	1.0045	0.442939	1.40532	1.78199	864
2020-11-04	-0.340857	-0.210825	-0.104258	0.400599	-0.423002	-0.726125	-1.3979	0.148138	0.572622	-0.14187	0.000505168	-0.520374	-0.482057	-0.144846	-0.0948964	865
2020-11-05	-1.21705	-1.24146	-1.45132	-1.28667	-1.01071	-1.5803	-2.62217	2.10715	0.558352	0.411971	-0.00112937	2.12526	1.38009	1.64921	1.88228	866
2020-11-06	-0.289327	-0.619823	-1.40505	-0.616959	-1.79656	-0.0759972	0.283235	-0.063434	1.4701	0.656351	-0.000312181	0.0790948	2.72513	0.939527	0.772898	867
2020-11-09	-0.918741	3.77465	1.38204	0.343111	3.3374	-0.161385	1.0893	-0.411015	-0.456943	-0.448621	0.000505495	-4.26756	-1.53439	-3.0956	0.41141	868
2020-11-10	0.357001	-0.39221	0.0252881	-1.30216	0.230892	0.0308224	-0.743061	-0.0845667	0.18791	0.146244	0.00104994	0.611254	-2.12755	0.275878	-0.171832	869
2020-11-12	1.94786	-0.359569	-0.0666739	1.245	0.020946	0.116296	-0.183866	1.34483	0.420365	0.0302935	-0.0012654	-0.277098	0.0276169	0.344348	-2.00273	870
2020-11-13	1.01088	-0.946872	-0.176917	-0.453949	-0.0490129	0.223383	-0.420327	-0.0100941	0.457412	0.514228	-0.000175872	0.877363	0.0511317	1.50961	-0.28638	871
2020-11-16	-1.64077	-0.143412	-0.360261	-0.277788	-0.259119	-1.43934	-1.15924	0.476732	-0.600309	1.04348	0.000232918	-0.359563	0.0275196	0.805451	0.135099	872
2020-11-17	0.621874	-0.598015	-0.323016	-0.666818	-0.259488	0.519224	-1.52278	1.17422	0.732731	0.624062	0.000369077	0.146383	0.832875	1.71516	-0.0406723	873
2020-11-18	-1.03854	-0.836801	-0.121269	-0.691014	-0.283275	-0.585392	0.169075	0.0906037	-0.152468	-0.429874	-0.000720808	-0.80408	-0.754466	0.125103	-0.0231245	874
2020-11-19	0.605121	0.194161	0.48331	0.996869	0.558888	1.26548	1.29066	-0.0141887	-0.290753	0.438322	0.000505386	-1.14963	-0.811647	0.4488	-0.482816	875
2020-11-20	-0.145538	-0.0935076	-0.249768	-0.919575	-0.00241453	-1.07707	-1.19623	1.01244	1.29225	1.07155	-0.000448327	1.02003	0.419221	0.765342	0.471708	876
2020-11-23	0.390005	1.00322	0.575624	-0.0749582	0.324433	0.754325	1.32887	-0.405031	2.94696	8.24767	-0.000584758	-2.139	-0.637188	-0.646728	0.0120161	877
2020-11-24	-1.25439	0.293456	-0.87309	-0.661623	-0.212467	-1.54052	0.267487	0.865612	-0.14843	1.54164	-0.000584976	-2.48855	-1.83955	-0.653545	-0.163958	878
2020-11-25	-0.595103	-0.395611	-0.614278	-0.367116	-0.704265	-0.201906	-0.835662	-0.554672	-1.04197	-1.2329	0.000642076	0.587937	0.605771	1.22068	0.0473151	879
2020-11-30	-0.218474	-0.0426694	-0.72163	0.537399	-0.68323	0.178148	0.0470835	1.07843	1.27537	0.620221	0.000505495	-2.96514	-3.17836	1.5089	1.17492	880
2020-12-01	-0.434876	0.00780743	-1.64145	-0.712816	-1.27612	-0.0963642	-0.311993	-1.12248	-0.877013	-1.13421	0.00159439	2.89198	3.44329	0.676371	0.45391	881
2020-12-02	-0.435677	0.175926	-0.965366	0.590091	-1.02242	-0.854213	-0.467163	0.4742	0.318056	0.395849	-0.00153735	0.658894	1.0499	1.21488	-0.430808	882
2020-12-03	-1.07057	-1.29072	-1.05044	-1.95441	-1.2905	-1.03755	-1.13881	0.196455	0.471511	-0.0351817	0.000369036	0.529244	0.431033	0.774945	-0.0740052	883
2020-12-04	-1.422	0.633028	0.185741	0.150141	0.0687765	0.11335	-0.658205	-0.955347	-1.40365	-1.75488	-0.000857008	0.579473	0.110215	2.1622	-0.835991	884
2020-12-07	-0.0209235	-0.278963	0.078474	1.75341	-0.361999	-0.241389	-0.041511	0.552256	0.637641	1.22113	0.000369159	0.946209	-1.15018	-2.17269	-0.250962	885
2020-12-08	0.216267	0.193548	0.490677	-0.0613003	-0.122836	0.719559	0.0585896	-1.05143	-1.08703	-1.14692	-0.00112991	0.427045	1.69725	0.0543558	-0.323248	886
2020-12-09	-0.312894	0.210118	0.563681	-0.446534	0.380219	-0.78501	0.564142	0.214273	0.506737	0.527396	0.000914462	-1.60681	-0.936665	-0.0648513	-0.00555417	887
2020-12-10	-1.17428	0.0078397	-0.675422	1.32388	-0.530188	-1.44346	0.0418196	-0.411421	-0.479552	-0.292782	-0.000175859	0.100832	-0.495647	0.882748	0.766736	888
2020-12-11	0.730273	-0.734545	0.114486	1.29333	0.59601	-0.259508	0.136155	-0.324428	-0.457264	-0.586046	0.000369118	-0.192342	-0.187132	-1.73387	-0.530537	889
2020-12-14	0.36294	0.278236	-0.584202	-1.69683	-0.698127	-0.114942	0.186014	1.44072	1.21374	-1.31049	-0.000857171	-0.698067	0.0762573	1.07344	-0.323796	890
2020-12-15	-1.04617	-0.651468	-0.225521	-1.45593	-0.291408	-0.382339	-0.518721	0.134751	0.044805	-0.844468	0.00132273	1.10316	0.835627	-0.00524772	0.628482	891
2020-12-16	0.455581	-0.195314	-0.296659	-0.905224	0.0690302	-0.217309	-0.36931	2.04143	1.29267	2.62437	-0.00181091	0.0234914	2.09808	0.231892	-0.480161	892
2020-12-17	-0.736305	-0.807523	-1.4691	-1.38442	-0.460385	-1.13691	-0.0192616	1.43303	0.11877	0.126722	-3.96044e-05	2.21025	1.34979	0.817558	0.0297906	893
2020-12-18	1.1152	0.348438	0.397145	1.47387	0.23768	0.0900606	0.403016	0.242401	0.243213	0.0994547	0.00145934	-0.690101	0.146558	-0.415263	0.100298	894
2020-12-21	1.09168	0.127042	0.113448	1.89818	0.237459	0.806055	0.53565	-0.437601	-1.25528	-1.70048	-0.00140222	-0.0386461	0.727503	-2.95521	-0.235246	895
2020-12-22	1.4847	0.279529	1.03962	0.0717861	0.741072	0.892852	-0.379832	0.99552	0.764563	-1.88688	-0.000448654	-0.221682	-0.866233	1.81772	0.644839	896
2020-12-23	-1.39908	-0.195429	-0.385407	-2.12536	-0.146866	-1.16244	-0.152483	-0.584225	-1.45247	-7.21686	-0.000312372	-0.175357	-1.03664	-0.606872	-0.443879	897
2020-12-29	-0.859143	-0.05978	-1.02397	-0.021074	-1.03691	-0.747052	-0.563832	3.5741	3.69863	-2.17797	-0.00113122	-0.0939248	1.83328	1.78211	-0.0937832	898
2020-12-30	-0.551002	-0.34857	-0.48902	-1.21376	-0.123715	-1.20927	-0.520129	1.13005	0.419993	-0.654609	0.00241531	0.718714	0.317861	1.67414	0.293654	899
2021-01-04	0.308208	-0.229977	0.467348	0.712018	-0.486142	0.494363	-3.40435	2.25486	5.44398	1.42601	-0.000448449	3.11581	2.03745	2.78592	1.91302	900
2021-01-05	-1.48764	-0.861859	-0.718763	-0.897383	-0.632803	-1.92688	-0.294943	1.27628	0.86124	-0.622406	0.00254768	-0.213384	0.480724	-2.05833	-0.527681	901
2021-01-06	-0.278705	0.912269	0.095259	0.357885	0.650518	-0.711497	0.368587	1.71057	1.54085	1.27703	-0.000992242	-0.526765	0.0115637	0.332415	-0.397273	902
2021-01-07	0.640902	0.974956	0.449259	0.555197	0.769166	0.627648	0.794618	1.50552	0.195713	3.46433	-0.00181056	-0.724793	-0.844834	0.886154	0.250338	903
2021-01-08	-0.406995	0.0587087	0.23728	-0.413942	0.0691281	-0.471805	-0.0642226	0.582394	-0.151178	-0.138769	-0.000448613	-3.35454	-1.04946	0.4905	0.333174	904
2021-01-11	1.28139	0.430035	1.48361	0.80514	1.31776	1.27131	0.244146	-3.0066	-1.83963	-1.4826	0.00105081	-0.974096	-3.61229	-5.51313	-1.30786	905
2021-01-12	-0.423799	-0.14392	0.024747	-1.4998	-0.0987983	-0.373848	-1.04646	-0.988159	-0.678876	0.197204	0.000913795	-0.408307	1.12135	1.94469	0.289357	906
2021-01-13	-0.644979	-0.329835	0.167638	0.0834419	-0.410692	-0.172484	0.368237	2.0084	1.17185	0.562257	-0.00167441	0.985332	-0.446142	1.94064	0.166939	907
2021-01-14	-1.422	-0.448929	0.0605017	-0.762331	-0.0750924	-1.01191	0.322974	0.991557	1.35885	-0.431939	-0.001267	-1.06202	-0.211435	1.38697	0.131921	908
2021-01-15	1.39828	0.21121	1.02796	1.19049	0.596528	1.32964	0.350693	-1.4135	-0.79455	-0.775958	0.00105147	-0.21628	-0.0308659	-1.28491	0.48897	909
2021-01-19	0.217766	0.0756533	-0.477369	-0.360305	-0.122804	0.390831	-0.137059	-0.564818	2.61218	0.627348	0.000778126	-0.308708	0.09341	0.331173	-0.913892	910
2021-01-21	-1.60557	-0.516954	-0.29746	-1.21646	-0.410886	-1.03673	-1.02988	-3.49011	-3.47369	-1.27841	-0.000448408	1.56505	1.25273	2.08339	0.408259	911
2021-01-22	1.41654	0.296074	-0.636215	0.472124	-0.387701	0.50975	1.19854	1.45355	1.63951	0.193433	0.0018671	-0.605617	-1.23545	-1.98215	-0.680134	912
2021-01-25	0.657911	0.00800848	0.739474	0.226136	0.717578	0.491345	-0.153855	-0.560176	1.06168	-0.275684	-0.00221891	0.191084	0.686358	0.881296	-0.14531	913
2021-01-26	-0.663253	-0.178227	-0.154128	-0.786149	-0.0270245	-0.695866	-0.844315	0.121225	0.571271	0.0129246	0.0015952	-0.0678616	-0.545367	-0.225679	-0.410021	914
2021-01-27	1.29836	0.65041	0.831152	0.536757	0.260691	1.13652	1.04097	-1.5339	-1.5552	-0.933608	0.000913128	-0.0531633	-0.504896	-2.0829	-0.218172	915
2021-01-28	0.544889	0.344989	-0.369786	-0.5004	-0.0509491	0.1095	-1.86721	2.02237	1.01947	0.664577	-0.00072006	-0.223807	0.0257632	1.23863	0.0299587	916
2021-01-29	-0.659897	0.528942	-0.225962	0.0570266	0.451953	0.251436	-1.18691	0.558793	0.596465	0.877328	-0.00112904	0.539999	4.77911	1.10395	0.224534	917
2021-02-01	0.909644	0.527195	1.17368	0.666928	1.45137	0.719638	2.17155	-0.565745	-0.104613	3.60225	0.000369036	-0.102959	4.32974	0.432845	-1.09654	918
2021-02-02	-0.203075	0.174831	0.908703	0.369567	0.543037	0.784506	-0.564494	1.21921	1.57133	-0.00429343	0.0010495	-1.81643	-4.5566	-0.884603	-0.150808	919
2021-02-03	-0.915771	-0.092709	-0.0834557	-0.0989387	0.163113	-0.747148	0.239229	1.26436	1.58303	0.833997	-0.000992527	0.0866909	-1.1272	0.0500849	0.0308076	920
2021-02-04	1.18366	0.608356	0.930228	-0.163916	0.919138	0.457475	0.559052	-0.446358	-0.756428	1.45784	-0.000448204	-3.04063	-0.878139	-1.06525	-0.0419159	921
2021-02-05	-0.896425	-0.00918467	-1.09703	-0.630885	-0.806199	-1.17247	-0.294438	0.726794	1.23435	0.195682	-0.000857171	0.984066	0.260898	2.04225	1.42438	922
2021-02-08	-0.4783	-0.442782	-0.173543	-0.305506	-0.215972	-0.942215	-1.07109	4.21434	0.266519	-0.0570785	0.00173117	1.88518	1.36243	2.13359	0.134738	923
2021-02-09	-0.773047	-0.980182	-1.09054	-0.743484	-1.31069	-0.45486	-0.746725	0.00372773	0.161901	0.705341	-0.000175736	0.205272	0.928305	1.19146	-0.410194	924
2021-02-10	-0.646598	0.0580784	-0.459183	-0.689025	-0.911384	-0.232896	1.29886	-0.864596	-0.305094	0.738223	-0.000720468	0.127674	-0.862489	2.76471	0.955512	925
2021-02-11	0.199898	0.108348	0.0964464	0.36488	0.403934	-0.43295	-0.058758	1.46142	0.387669	0.575206	-0.000448286	-0.204335	-0.240143	-0.153137	-0.439617	926
2021-02-12	0.0893477	0.292451	0.0248088	-0.41856	0.116586	-0.131976	-0.00814309	-0.338937	0.472406	1.86214	0.00159439	-1.47128	-0.135444	-0.750119	0.0293401	927
2021-02-16	-0.00267079	1.54044	0.347559	-0.698851	0.307607	0.0481577	-0.00814309	0.777915	-0.58173	-2.13698	-0.00153735	-1.38951	1.03574	2.15442	0.116343	928
2021-02-17	0.328296	-0.108806	1.17638	0.799128	1.49591	0.368893	-0.00814309	1.2278	0.579142	0.335029	-0.000312099	-0.880674	-0.98003	-1.27215	0.185271	929
2021-02-18	-0.112941	-0.258347	-0.641601	-1.3754	-0.382466	-0.212402	1.68643	-0.263496	0.731334	-0.111852	-0.000448449	-0.516985	0.0856262	1.30986	-0.0575094	930
2021-02-19	-2.03357	-0.208741	-1.03385	-0.871254	-0.454636	-2.45736	-1.77021	1.73955	0.15188	0.764974	-3.96044e-05	0.747305	-0.473236	1.32927	-0.127039	931
2021-02-22	0.182688	-0.893037	-0.332958	-0.652463	0.25887	-0.857801	0.385416	-0.775762	-1.63499	0.0320274	-3.96044e-05	1.23785	1.0196	-1.24347	0.546896	932
2021-02-23	0.0714316	0.224748	0.239366	-0.184036	1.5374	0.263032	0.0761355	-2.29682	-2.02459	-2.35555	-0.000175913	-0.525269	1.05209	-0.82866	-0.558004	933
2021-02-24	-1.35875	1.13888	-0.0109975	-0.171236	1.24516	-0.659106	-0.480356	0.304263	0.444594	-0.187823	0.00132287	-0.76212	-0.470496	-0.445713	-0.424824	934
2021-02-25	-0.170406	0.487506	-1.52628	0.0178321	-0.943714	-0.363779	-0.0925314	-1.32489	-1.62943	-1.01608	-0.000856926	-0.564147	0.349654	0.288749	2.14935	935
2021-02-26	3.14548	0.667277	2.43644	2.0072	1.40774	4.60609	1.05372	-0.328189	-0.385092	-0.267683	-0.00072108	-2.33411	-2.61283	-2.19487	-1.75857	936
2021-03-01	-0.850344	0.0400258	0.708644	0.119951	1.09595	-1.13438	-0.468464	1.45648	1.35281	0.509825	0.000641872	-0.599446	0.417377	0.197088	-0.0751654	937
2021-03-02	-0.742287	0.0893681	-0.443207	-0.300517	0.0908666	-0.9279	0.295061	-0.581677	-0.925068	-0.320419	0.00132233	-0.703466	-1.37313	-1.02371	-0.0752836	938
2021-03-03	-0.0211912	0.253642	0.114833	-0.198308	0.927831	0.266338	-0.159713	0.836646	0.870401	0.351066	-0.000992813	-0.844416	0.682719	-0.210996	-0.127866	939
2021-03-04	-0.503279	1.05502	0.51132	-0.261562	1.80021	0.00801277	0.098524	-0.935517	-0.382431	0.899794	-0.000584594	-0.00852275	-1.38885	-1.14944	0.256098	940
2021-03-05	1.51439	1.04841	2.38257	2.33087	1.12262	2.83894	1.48192	0.116403	-0.123641	-0.762991	0.00118632	-1.06845	-1.3549	-2.08787	-0.249711	941
2021-03-08	0.107948	1.07413	1.19538	0.0952911	1.1625	0.23145	1.60942	1.49775	2.97821	0.503283	-0.000993003	-0.646841	-0.471705	0.804196	-0.28638	942
2021-03-09	-0.371603	-0.477941	-0.652148	-0.944509	-1.41841	-0.942578	-1.12293	1.01517	0.307871	0.288109	0.000641463	1.86142	1.32628	1.47757	-0.519497	943
2021-03-10	-0.205832	-0.122873	-0.267118	-0.186665	0.593285	-0.455032	-0.00814309	0.340381	-0.718708	-0.685587	-0.000175791	-0.0976791	-0.263933	0.567566	-0.130579	944
2021-03-11	-1.54134	-0.252454	-1.41242	-1.02745	-1.65461	-1.05433	-0.667478	0.71175	0.260275	-0.320139	-0.000175804	0.457675	1.31173	1.5807	1.0365	945
2021-03-12	-1.62645	0.669248	0.47897	0.705784	0.87185	0.00810234	0.824209	-0.256821	-0.582212	-0.390348	-0.000312045	-1.29154	-1.73059	-1.12649	0.0467318	946
2021-03-15	0.352911	0.360922	0.644005	0.759816	0.0668441	0.849759	-0.482741	-0.629988	0.207164	-0.1415	9.66227e-05	1.14722	1.36428	1.36798	0.54806	947
2021-03-16	-0.733136	-0.186892	0.408322	-0.32769	-0.484478	-0.393193	0.304603	0.383147	0.0834115	0.7042	-0.000857171	0.663299	-0.0633262	-0.206748	1.77675	948
2021-03-17	0.447116	0.312189	-0.175665	0.0564113	0.365683	0.771831	-0.130975	0.726855	0.138124	0.246848	-0.000857662	-0.390293	-0.52531	-0.766858	-0.137402	949
2021-03-18	-0.771582	-0.428336	-0.375982	-0.63344	0.135735	-1.73484	0.125854	-0.529998	-0.472959	-0.0607783	0.000642144	-0.290091	0.595547	1.10855	3.01688	950
2021-03-19	1.4393	-0.219368	0.316789	0.848767	0.479483	0.967462	0.0811607	0.115654	0.280925	-0.0895832	0.000233	0.533477	0.0786823	-2.20153	-0.983287	951
2021-03-22	0.314491	-0.316531	-0.412271	0.21033	-1.54212	-0.0920571	-0.00814309	-1.60766	-1.25486	2.01192	0.000369199	0.00658522	-0.97638	0.512618	0.416328	952
2021-03-23	0.36991	-0.122846	1.10207	0.789345	2.17864	1.35681	0.493782	0.070138	-0.177535	0.124969	-0.000584703	-0.680579	-0.286356	0.149259	0.00998816	953
2021-03-24	0.0531651	0.297291	0.758451	0.935216	0.659461	1.20589	0.381764	-0.936208	-0.914847	-1.78909	0.000232972	0.218424	-0.97462	-0.573694	-0.208065	954
2021-03-25	1.14829	0.489939	1.00073	0.0181837	0.884452	1.0513	1.22566	-0.480655	0.0112233	0.740604	0.000232918	0.374949	-1.22183	-0.0571883	0.27458	955
2021-03-26	-0.670281	0.64883	-0.38014	-0.924818	0.134305	-1.21762	-0.23014	1.50295	1.11095	1.26429	-0.000448408	-0.399301	0.864576	-0.684531	-0.160948	956
2021-03-29	0.275732	0.262511	0.357037	0.018117	-0.364721	-0.296618	1.5651	0.968267	1.09357	0.0266455	9.66772e-05	-1.69487	-0.534597	1.55107	-1.04617	957
2021-03-30	0.62715	0.708918	1.02366	0.831764	1.06291	0.721365	0.102393	0.391007	0.190078	-0.101756	0.000913985	-1.47008	-1.15754	-1.2994	-0.0694773	958
2021-03-31	-1.02235	0.642352	-0.344891	-0.847066	-0.182516	-0.134327	-1.10393	-0.0531829	0.653697	0.143645	-0.000993194	0.406127	-0.822722	0.826168	0.89609	959
2021-04-01	-0.039834	-0.0258433	-0.528945	-0.380828	-0.18271	0.171829	0.695091	-0.067491	0.39824	-0.00608335	-0.000584812	2.18313	0.724931	0.86589	0.228467	960
2021-04-06	-0.542203	-1.26881	-1.46447	-0.303013	-1.88929	-1.15144	-1.53262	-0.325375	1.14726	8.5807	0.000369322	1.11688	1.65794	1.10395	0.366128	961
2021-04-07	1.37161	-0.281901	-0.688527	1.18976	-1.14726	0.658635	0.241754	-0.849437	-1.26825	-2.33764	-0.000312208	-0.466906	-0.145104	0.985907	-0.501882	962
2021-04-08	-0.70737	-0.699777	-0.248754	0.237914	-0.554051	-0.276366	0.491136	0.77989	0.94993	1.8763	9.67044e-05	1.03736	0.763424	-0.896559	0.274368	963
2021-04-09	-0.672248	0.600038	0.13468	0.0699208	0.020946	0.17118	0.0860882	-0.0345033	-0.137766	-0.523182	-0.000312236	-0.946021	-0.256724	-1.01111	-0.0986497	964
2021-04-12	0.295156	-0.362579	-0.175635	-0.0853234	-0.463254	0.212153	-0.268725	0.607433	0.532269	4.81815	0.000233027	-0.577915	-0.16687	-1.1312	0.195887	965
2021-04-13	-0.281872	-0.411476	-0.576169	-0.00769991	-0.325586	-0.195202	-0.252261	1.27502	1.19219	2.65574	-0.000448572	0.893952	-0.498103	-0.732734	0.684209	966
2021-04-14	-0.487412	-0.44457	-0.629045	-0.61444	0.367478	-2.07455	-0.780415	-0.247294	0.89989	0.264268	9.67317e-05	-0.830323	0.843461	0.670562	-0.203632	967
2021-04-15	0.444818	-0.267871	0.188401	0.121257	-0.00213858	-0.312916	-0.408815	0.0327059	0.527444	-0.608381	0.00145919	1.30015	0.552344	0.458273	0.736113	968
2021-04-16	-0.767651	-0.0258433	-0.283444	-0.574132	-0.69592	0.228904	-0.102811	-0.705687	-0.650849	-1.72158	-0.000175791	1.01323	1.20572	0.505678	0.397468	969
2021-04-19	0.669153	-1.14349	-0.8618	-1.92517	-0.930888	-0.513089	-0.66593	-2.2306	-1.95462	-2.25013	-0.000175804	-0.0500874	-0.0960565	1.15389	0.598978	970
2021-04-20	0.741541	-0.058345	-0.299938	0.285182	-0.211855	0.328768	-0.588877	0.281653	1.24732	0.730767	9.65954e-05	0.152725	-0.513791	-1.88089	-0.417441	971
2021-04-21	-1.68049	0.00665855	0.223436	0.247363	0.509535	-0.272441	-0.444303	-1.12402	0.171984	-0.978588	-0.000857008	1.18925	0.0465865	0.302855	0.171475	972
2021-04-22	0.10956	0.104104	0.386362	1.0925	0.392454	0.590079	0.0310209	-0.931178	0.25081	-1.45743	0.000232918	-0.689395	0.833429	1.1616	1.28412	973
2021-04-23	0.0908136	-0.399701	-1.02155	0.0822333	-0.676163	-0.293083	0.187614	-0.303556	-0.270284	0.101504	0.000505277	-0.417084	-0.400735	1.48394	0.434315	974
2021-04-26	-1.80414	0.266808	-0.244964	-0.571458	-0.142042	-1.27103	-0.573328	1.1664	1.10171	2.03676	9.65818e-05	-0.572085	-0.0523499	-0.695683	0.0367648	975
2021-04-27	-0.0591912	0.687481	0.0788235	-0.224921	-0.23543	0.526509	-0.0865551	0.363953	0.81925	0.305324	-0.000311991	0.609637	0.361835	0.636129	0.149244	976
2021-04-28	-0.795396	0.378168	-0.33456	-0.109732	-0.212391	0.128008	-0.33878	-0.129261	0.470772	-0.449353	-3.96044e-05	-0.786777	-0.928185	-1.39515	0.0786357	977
2021-04-29	-1.12083	0.183876	-0.208485	-0.492091	-0.563517	0.168162	-0.350304	-0.575618	0.0331139	0.35873	-0.00058454	-0.643005	0.889068	0.0449408	0.482143	978
2021-04-30	-0.078672	0.601816	1.4468	1.51424	0.675437	0.851207	0.210653	1.6125	0.0606805	1.73935	-0.000175872	0.256052	-0.917152	0.0950057	0.215479	979
2021-05-04	0.547778	-0.00977889	0.296025	-0.443693	0.230892	0.55272	-0.00814309	-1.63824	2.81673	-1.81007	0.000505386	1.79003	2.0391	1.47911	0.255387	980
2021-05-05	-1.10487	-0.138325	0.205895	-0.50644	-0.118995	-1.25931	-0.00814309	1.4299	1.12953	1.8934	0.000368995	-0.998429	-1.15891	-1.33954	-0.294059	981
2021-05-06	-1.33987	-0.186656	-0.824082	0.427257	-0.773793	-0.372169	-0.648072	-0.454912	-0.191653	-0.119263	-0.000448204	1.82323	0.906551	0.541879	-0.925708	982
2021-05-07	-1.05873	-1.07473	-2.0746	-1.52462	-2.02625	-1.86018	-1.83872	0.313968	-0.072683	-0.211099	0.000232809	1.34664	1.35246	0.586074	-0.788417	983
2021-05-10	-1.00554	0.265246	-0.082379	-1.92642	-0.523572	-0.307942	-0.878786	-0.635021	2.07542	-1.72961	-3.96044e-05	0.178402	0.726378	1.11234	1.7801	984
2021-05-11	0.132581	-0.300748	0.0247455	0.0554674	0.825395	0.640207	0.721303	0.284261	0.875514	0.777415	9.65818e-05	-0.728448	-0.546923	-2.06176	-0.895707	985
2021-05-12	0.229008	1.5851	1.70952	0.861398	1.62079	2.16165	1.57575	-3.11992	-1.52911	-2.06109	-0.000311991	0.0422842	-0.165182	0.786383	0.232781	986
2021-05-13	0.825629	0.0222575	0.0788772	0.612078	-0.448349	0.209167	-0.345762	0.0934695	-0.442884	0.913097	-0.000175818	-0.585153	-1.26194	-1.85173	-1.39888	987
2021-05-14	-0.63808	-0.330704	-1.26728	-0.790827	-1.08599	-1.07404	-0.791501	0.0100844	1.49796	0.375686	0.000505168	0.919189	0.846646	1.09939	0.29702	988
2021-05-17	-0.794535	-0.347322	-0.243472	-0.385174	-0.0971519	0.207972	0.110314	-3.05402	-3.67296	0.819712	-0.00140194	0.86939	0.771697	0.0444907	0.35177	989
2021-05-18	-0.234945	-0.28345	-0.849318	-0.710381	-0.689019	-0.351518	-0.787286	-0.381597	0.459995	0.786971	0.000914176	0.712643	1.74172	-0.304289	0.334577	990
2021-05-19	0.538943	-0.429112	-0.224417	0.193273	0.42355	0.567953	0.511471	-3.5069	-5.51137	-5.39905	0.00132178	1.20847	-1.64658	-1.21629	-0.317233	991
2021-05-20	-0.776789	0.022598	-0.1531	-0.157747	-0.405365	-0.551792	-0.0250753	2.24666	2.16823	1.37041	0.00023251	-0.641468	0.114381	0.0965957	-0.448792	992
2021-05-21	0.442761	0.216163	0.843722	0.306235	0.068356	0.969356	-0.00814309	-2.00071	-2.25154	-2.14291	0.000368465	-0.192735	0.1038	-0.0561482	-0.366522	993
2021-05-24	0.19073	-0.235562	-0.563211	0.143363	-0.311146	-0.212635	-0.923658	0.799481	1.37788	-0.222209	-0.00180879	0.193873	-0.338782	-1.23978	-0.899863	994
2021-05-25	-0.254124	0.199998	-0.401947	0.306981	-0.026538	-0.011879	-0.444106	-0.264942	0.332345	-0.259132	0.000232727	0.343827	-0.205737	0.615139	-0.482605	995
2021-05-26	0.808742	0.215807	0.522516	-0.0702521	0.06843	-0.0519991	-1.11455	0.448567	1.0443	0.731457	0.000368791	0.681938	1.13929	0.761468	0.337885	996
2021-05-27	-0.697994	1.11348	0.184979	-0.534807	0.115882	0.128587	-0.468721	-0.526601	-0.920186	-0.840381	-0.000992718	-0.531137	-0.971582	-0.823422	0.261235	997
2021-05-28	0.229334	0.00614359	0.00689386	-0.195294	0.447636	0.59156	-0.86261	-1.7046	-2.12835	-1.04242	-0.00058454	0.436302	-0.0711954	-0.782382	0.537463	998
2021-06-01	-1.08734	-0.666689	-0.828838	0.255927	-0.952206	-1.19642	0.686976	0.579745	1.42474	1.52434	-0.00072108	-0.087642	1.16654	0.771886	0.125453	999
2021-06-02	0.307748	0.230776	0.50439	-0.107623	0.638582	0.248347	0.0430835	0.469691	0.421877	0.151722	0.000369322	0.142072	-0.968519	0.251612	0.44252	1000
2021-06-03	1.3313	1.07655	1.63167	0.985708	1.6985	2.00457	1.30421	0.895132	0.855161	0.226778	-3.96044e-05	-2.14999	0.00101567	-1.03924	-0.701437	1001
2021-06-04	-0.543076	-1.40091	-0.90519	-0.950169	-1.41953	-1.82786	-0.524563	-1.41677	-1.04253	-1.0184	0.00050544	1.34438	-0.827513	-0.528892	0.445216	1002
2021-06-07	-0.505597	-0.298937	-0.474428	-0.0449094	-0.47722	-0.472576	0.0940642	-2.11838	-0.628804	-1.56433	-0.000312099	-0.180264	0.427265	0.622588	-0.0779253	1003
2021-06-08	0.751314	0.327492	0.363326	0.419331	-0.121601	0.46888	0.201859	-0.179864	-0.571235	0.132074	0.000641531	0.221074	0.259228	-0.318358	-0.545101	1004
2021-06-09	0.0166302	0.198637	-0.0644395	0.281835	-0.0979163	0.188877	-0.774956	2.43558	0.593361	0.650052	-0.000993289	0.0304141	-0.298346	-0.372586	0.155593	1005
2021-06-10	-0.137811	-0.218237	0.203117	-0.509907	-0.145573	-0.433168	0.355585	-0.460703	-0.932668	-0.790698	0.000232945	-0.396527	0.145813	-0.906674	-0.639122	1006
2021-06-11	1.28762	0.390744	1.29566	0.646244	1.01811	1.11411	0.207648	0.349604	-0.85684	-0.352393	-0.000448449	-0.493322	0.962736	0.579547	0.305084	1007
2021-06-14	-0.598784	0.341855	-0.441461	-0.0199483	-0.0264323	-0.455205	0.0599749	1.78706	1.53128	0.626868	9.66908e-05	-0.953469	-0.857546	0.0476385	-0.524597	1008
2021-06-15	1.36038	0.197597	0.114415	0.547418	-0.121252	0.835571	0.405966	-0.256032	-0.278988	-0.38642	-0.0001759	-0.0824239	-0.236158	0.0475926	-0.0354129	1009
2021-06-16	-0.712001	-0.409057	0.0248192	-0.461398	0.0446523	-0.738547	-0.479016	-1.08157	-1.23818	-0.570876	-0.000312236	-0.308061	0.155847	-0.376095	0.719806	1010
2021-06-17	3.57936	0.612383	3.76788	2.46564	4.40829	3.18243	2.86431	-0.215624	-0.00208023	0.118376	0.000233027	-4.97604	-2.36444	-2.94447	-1.65219	1011
2021-06-18	1.58023	-0.137366	0.719385	1.27405	0.994034	1.14358	0.262098	-1.43807	-1.06814	-0.764942	0.000777962	-0.397388	-0.472179	-1.35845	-2.16932	1012
2021-06-21	-1.26435	-0.00990715	-0.669116	-1.25081	-0.696855	-0.611313	0.745218	-2.72865	-2.791	-3.61984	0.001458	0.0668239	-0.957701	-1.74008	-0.458841	1013
2021-06-22	-0.11599	0.816708	-0.0113475	-0.0713802	0.391726	-0.011879	0.844529	0.506954	-0.161937	-1.46855	-0.000720128	-0.0531633	0.0134278	0.983874	0.864209	1014
2021-06-23	-1.48085	0.14852	-0.721508	-0.708234	-0.698028	-1.26526	-0.479109	0.741299	0.766964	2.0638	-0.000992908	0.959915	-0.0745473	1.8702	0.201111	1015
2021-06-24	0.96489	0.0533558	0.425426	0.897516	0.461895	0.315898	-0.154042	0.594853	0.142958	0.669518	-0.000720944	-0.465218	0.0793821	-0.00524772	0.68631	1016
2021-06-25	-0.837191	-0.231835	-0.229767	0.107494	-0.280657	-0.462395	-0.88477	-2.11319	-1.60906	-1.28002	-0.000312236	0.05687	0.287166	0.607305	0.025619	1017
2021-06-28	0.604549	-0.47034	0.0432865	0.0563855	0.229794	0.41813	0.0481145	1.89045	2.3169	0.651876	0.000778126	-0.441832	-0.107027	0.105468	0.351247	1018
2021-06-29	0.999577	0.0218353	0.608254	0.645886	0.414878	1.16133	0.441604	0.80912	0.564796	1.18004	-0.000312127	-1.58762	-0.315755	-1.85826	0.210121	1019
2021-06-30	0.48743	0.798535	1.04954	0.50655	1.22141	0.422599	-0.396017	-0.55722	0.837967	-0.0255896	9.66635e-05	0.424612	-0.439048	-0.63564	0.513561	1020
2021-07-01	0.0161587	0.77894	-0.158068	0.340232	0.020946	0.48616	0.626854	-1.01232	-1.29306	-0.912204	-0.000175872	1.07707	1.06694	1.5306	1.20535	1021
2021-07-02	-1.11622	-0.467229	0.171856	-0.188113	-0.647711	-0.57206	0.227591	0.1278	0.326228	-0.102119	9.66635e-05	0.231396	-0.215573	0.274974	-0.13835	1022
2021-07-06	2.25661	-1.00716	0.594442	0.0438852	0.505355	0.0502637	0.356382	0.219079	1.22493	0.142954	-0.000175872	1.38576	0.932398	0.827777	1.30346	1023
2021-07-07	0.745594	-0.0893428	0.24604	0.00523294	0.182171	0.21619	-0.389501	-0.283955	-0.0772058	-0.285527	0.000232918	-0.367256	-0.504372	-0.670755	-0.524166	1024
2021-07-08	0.501056	-1.30068	-0.673062	0.327663	-2.27066	0.987272	1.00046	-0.717662	-1.51701	-0.632066	-0.00113002	0.131174	-0.628688	-1.24453	-0.722133	1025
2021-07-09	-1.06737	0.548978	-0.378082	-0.960307	-0.0256041	-0.907251	-0.62418	0.570784	0.168901	0.266177	-0.000312345	-0.15587	-0.227713	1.01057	0.229808	1026
2021-07-12	-0.396156	0.260864	0.0618487	-0.558785	0.0907673	-0.219367	-0.215591	-0.505141	-0.921199	-0.19762	0.000505822	-0.878315	-0.206448	0.828536	0.21388	1027
2021-07-13	1.04515	-0.0258433	0.832889	0.505068	0.253519	0.382586	-0.378479	-0.31025	-0.828471	-0.232374	0.000505604	1.24545	0.375484	-0.00524772	0.357584	1028
2021-07-14	0.183947	-0.55183	-0.23205	-0.0845846	-0.211626	0.029702	0.00869856	0.0125078	0.426475	-0.0185772	-3.96044e-05	0.508099	0.122426	1.46743	-0.0344873	1029
2021-07-15	1.0025	0.00607964	0.374608	0.0693837	0.764286	0.675819	-0.50249	-0.724409	-0.696275	-0.517513	-3.96044e-05	-0.0202376	0.0567487	-0.113124	-1.00161	1030
2021-07-16	0.201556	0.10179	-0.0666988	0.828414	0.160034	0.553057	1.03033	-0.364283	-0.377276	-0.210508	0.000505386	-0.0202476	-0.237852	0.210315	-0.965612	1031
2021-07-19	3.05781	-1.1137	0.117292	1.23422	-0.280526	1.37779	0.596731	-0.448161	-0.578059	-0.774609	-0.000312072	-0.617093	-1.75151	-2.75613	-1.55207	1032
2021-07-20	-0.516094	0.726774	0.522829	0.981523	0.924085	0.36929	-0.276851	-0.815586	-0.330364	-0.725211	-3.96044e-05	0.435944	-0.540456	-0.74127	-0.210947	1033
2021-07-21	-3.44222	0.45287	-0.417	-1.03595	-0.882193	-0.688867	-1.02319	1.629	1.81684	1.00505	-0.000175859	-1.31186	0.00318789	-0.233514	0.933959	1034
2021-07-22	0.741304	-0.217172	0.523048	-0.70706	0.391928	-0.180666	0.193971	0.0652892	0.21816	0.440807	-3.96044e-05	-0.216834	-0.0992124	0.620442	0.272159	1035
2021-07-23	0.0344658	0.642897	0.191532	0.0181583	0.391283	0.00920933	0.597525	0.829906	0.767515	0.350189	9.66499e-05	-0.0440641	0.196385	-0.175255	0.861685	1036
2021-07-26	-0.746527	-0.359895	-0.896339	-1.02583	-1.23153	-0.475162	0.0871015	2.25614	0.782901	0.292301	-3.96044e-05	-0.0167739	0.432408	-0.575385	-0.581674	1037
2021-07-27	0.722618	-1.0959	-0.379059	-0.700172	-0.491441	0.367068	1.55143	1.2107	0.490314	0.423808	-3.96044e-05	-0.0440679	-0.585079	-0.00524772	-0.853991	1038
2021-07-28	-0.299953	0.645698	0.411243	0.00523294	-0.00237361	0.389126	-1.11984	0.258163	-0.0408642	1.63568	-0.000175859	-0.280778	-0.751696	-0.986879	-0.46007	1039
2021-07-29	-2.31953	-0.873689	-1.40505	-1.04129	-1.66481	-1.08593	-1.93231	-0.0513082	0.553243	0.270073	-0.000175872	1.91584	1.46911	1.48975	0.913917	1040
2021-07-30	0.503766	0.246553	0.40937	0.680939	-0.00256147	1.01991	0.256122	1.14106	0.521188	0.0321935	0.000232918	-0.265213	0.0701066	-1.73353	-0.113574	1041
2021-08-02	0.652192	-0.796053	-0.157846	0.350451	-0.214272	-0.286288	0.0536785	-1.70954	0.940063	-0.260417	-0.000175859	-0.911531	-0.210267	0.980115	0.348306	1042
2021-08-03	0.911063	-0.235024	0.263209	-0.237768	-0.0732138	-0.454133	0.441152	-0.647499	-0.697267	-0.492099	-3.96044e-05	0.0191275	0.103913	-0.524927	-0.00555417	1043
2021-08-04	0.0159397	0.53677	0.336887	-0.0842101	0.350324	0.135399	-0.260803	0.867254	1.36867	0.291848	-0.000312154	0.933028	0.449438	0.168471	-0.266809	1044
2021-08-05	-1.19674	0.470971	0.0619415	-0.211799	0.23242	-0.663054	-0.27222	0.573263	0.58251	0.0158911	0.000369199	-1.75836	-0.510985	-2.48352	-0.346134	1045
2021-08-06	1.41461	0.724721	1.42458	0.721164	1.70522	1.08197	1.20951	0.974679	0.332032	0.221003	-3.96044e-05	-2.3721	-1.09524	-0.976479	0.288749	1046
2021-08-09	0.146017	0.0219564	0.228667	0.274452	1.15962	0.347403	0.171073	1.69211	1.48283	1.16676	-0.000175859	-1.55264	-2.67505	-1.11669	-0.643285	1047
2021-08-10	-0.74706	0.43555	0.506714	0.159256	0.830575	-0.138779	-0.0361398	-0.384488	-0.150919	0.514472	-0.000175872	-1.03059	-1.10757	0.367488	-0.0683053	1048
2021-08-11	-0.338422	-0.137103	-0.270926	-0.328315	-0.233177	-0.602714	-0.394718	-0.0646973	0.0892359	2.27357	9.66635e-05	1.22206	0.0414329	1.40284	0.524799	1049
2021-08-12	0.0906418	-0.200823	0.0254041	0.428689	0.367403	0.600099	-0.0137487	-0.624098	-0.68107	-0.668577	9.66499e-05	0.184486	-0.0195589	0.477001	-0.207528	1050
2021-08-13	-0.11465	-0.999361	-1.10094	-0.302835	-1.55419	-0.687027	-0.0866301	1.59268	1.43612	1.59375	-0.000175859	1.58682	-0.092757	0.532764	0.13438	1051
2021-08-16	1.07756	-0.811776	0.375544	0.107863	-0.887725	0.790187	-0.15395	-0.909711	-0.938393	1.09137	-3.96044e-05	0.713385	0.357625	-0.483246	-0.192239	1052
2021-08-17	0.961579	0.503845	1.1537	1.42244	0.510712	1.79735	0.61953	-0.69006	-0.756656	-1.04097	-0.000175872	0.136111	0.846984	0.0547073	-1.06377	1053
2021-08-18	0.293222	0.502253	0.229558	-0.124072	0.834729	0.373972	-0.0809424	-0.0342951	-0.0198278	0.514055	9.66635e-05	-0.419798	-0.571665	-0.971671	-0.960539	1054
2021-08-19	2.78978	-0.297694	0.174042	0.990319	-0.118339	1.41117	0.557068	0.937591	0.874892	0.98156	-0.000175872	-0.138889	-0.821154	-1.85962	-2.59074	1055
2021-08-20	1.14501	0.00616107	0.0626384	0.630218	0.0905999	0.79163	0.383072	1.13848	0.48221	0.272736	0.000232918	-0.237088	-0.350756	0.245283	-1.04761	1056
2021-08-23	-3.42588	-0.00984328	-0.772231	-1.19073	-0.886336	-1.63631	-1.16624	0.0467063	0.146286	-0.208369	-0.000175859	1.34604	0.531373	2.02329	0.756511	1057
2021-08-24	-0.945048	-0.185909	-0.252195	0.0181894	-0.142309	-0.999854	-0.540878	-0.884806	-0.78776	-1.25437	-3.96044e-05	0.336869	0.778978	-0.186898	1.99912	1058
2021-08-25	0.163908	0.533749	-0.214936	-0.0854422	0.184201	-0.268581	0.24991	0.538157	0.254624	0.409301	-0.000175872	-1.25188	-0.031575	-0.370179	0.410396	1059
2021-08-26	0.551734	0.069908	-0.0485283	0.147743	0.881794	0.373334	0.288952	-1.05411	-0.746559	-1.24644	9.66635e-05	-0.181399	-0.212161	-0.556771	-1.50594	1060
2021-08-27	-0.760688	-0.425152	-0.601819	-0.731995	-1.18989	-1.31347	-0.55768	0.985143	0.915204	1.3795	0.000369118	0.671522	-0.176528	-0.00524772	0.489381	1061
2021-08-31	0.293433	0.309637	-0.103598	0.289415	0.929716	0.0306237	-0.609098	-0.944358	0.753046	-0.0850118	-0.000448327	0.934737	1.0228	0.607249	1.18159	1062
2021-09-01	-0.261741	-0.0577661	-0.911694	-0.54979	-0.351414	-1.32408	-0.109336	0.732493	1.82405	0.522755	-3.96044e-05	-0.236773	-0.317144	0.661472	-0.369746	1063
2021-09-02	-1.04184	-0.0577719	-0.13972	-0.445254	0.346797	-0.684833	-0.154361	0.155897	-0.237512	0.160964	-3.96044e-05	-0.00798468	0.562255	-0.732941	-0.947428	1064
2021-09-03	-0.654505	-0.617573	-0.46892	-0.469757	-0.514643	-0.869862	-0.188184	0.274296	0.618756	0.344939	-0.000175872	0.616297	-0.280048	0.359684	-0.124822	1065
2021-09-07	1.8179	0.821154	0.647656	0.904937	1.02117	0.993063	0.745183	-1.53002	-2.37366	-1.86448	0.000232918	-1.35078	0.429634	0.297203	-0.34824	1066
2021-09-08	1.08658	0.213133	0.576008	0.405133	0.947192	0.535192	-0.289052	-0.394289	0.315955	-0.318932	-0.000175859	-1.03583	0.145046	-0.855918	-0.699624	1067
2021-09-09	-0.611288	-0.919686	-0.158487	-1.20461	-1.04459	-0.264613	-0.37365	0.105627	-0.379597	-0.177772	-0.000175872	0.0842725	-0.420141	-0.80592	-1.94033	1068
2021-09-10	-0.22438	0.245983	0.117134	0.107878	0.183436	0.283017	-0.610627	-0.802349	-1.12618	-0.424228	-3.96044e-05	0.33378	-0.304024	-0.440772	-0.745919	1069
2021-09-13	0.126685	-0.00986656	0.227541	0.0437401	0.785306	-0.0961922	0.391747	0.00253023	0.366076	0.0895328	-3.96044e-05	-0.0957514	-1.087	-1.2033	-0.931075	1070
2021-09-14	0.366523	-0.473741	-0.26888	-0.0461081	-0.441975	0.727418	-0.735031	0.978074	0.687998	0.354751	9.66635e-05	-0.123165	0.0288467	-0.452635	-3.38858	1071
2021-09-15	-0.187195	-0.442773	0.245878	0.146456	0.0904484	0.2212	-0.358019	0.441544	0.838704	0.275904	9.66499e-05	0.202279	0.546155	-0.650118	0.283822	1072
2021-09-16	0.476789	0.407103	0.873113	0.674358	1.29115	0.753381	1.37809	-0.227746	-0.230992	-0.393516	-0.000175859	-3.07118	-0.900645	-0.265117	0.729327	1073
2021-09-17	1.0817	0.406038	0.561611	0.392416	1.3294	0.244048	0.49208	-0.267978	-0.854389	-0.327592	-0.000175872	0.445309	-1.14969	1.02765	-0.147422	1074
2021-09-20	1.45966	-0.778323	0.0994846	1.28895	-0.689671	0.586929	-0.0306103	-2.22822	-2.25795	-1.97005	-0.00044849	0.05868	-1.56632	-1.43004	-1.45185	1075
2021-09-21	-0.53171	-0.250611	0.0995241	-0.0858405	-0.945623	0.159634	-0.00814309	-1.23209	-1.28655	-0.736931	0.000369281	0.979067	0.3869	0.321503	-1.11391	1076
2021-09-22	-1.02767	0.391353	-0.270878	-0.0727929	-0.256024	-0.525851	-0.232891	1.48187	1.78427	1.82242	0.000369159	-0.117777	0.434275	3.29308	1.77029	1077
2021-09-23	-1.30872	0.901271	0.0809317	-0.980141	0.482363	-0.715824	-0.126192	0.612339	0.37144	-0.0592399	0.000232836	-1.50315	-0.00700378	-0.314757	-0.463286	1078
2021-09-24	0.181722	0.848819	0.377462	0.834658	0.0900725	0.820399	0.385203	-1.08965	-1.26978	-0.803271	0.000368954	-0.252957	-0.220773	-0.880323	-0.426148	1079
2021-09-27	-0.537812	0.370295	0.248103	-0.397003	0.251206	-0.567227	-0.570196	-0.38896	-0.0461136	-0.352285	-0.000856844	0.476736	-0.284733	1.05572	0.121077	1080
2021-09-28	0.90082	0.543031	0.397105	2.28795	0.618459	0.993473	0.188675	-0.665149	-0.728278	-0.449648	-0.000312127	-1.40165	-0.925333	0.0565913	-0.111053	1081
2021-09-29	1.06227	0.761215	1.29398	1.29648	1.23379	1.00002	0.592896	0.226799	0.22914	0.463631	-0.000312181	0.160701	0.301017	-1.2541	-1.01072	1082
2021-09-30	-1.41753	-0.544906	0.662688	-0.404238	0.112202	-0.830522	-1.51543	1.14105	0.821285	0.34637	9.66908e-05	0.301306	-2.10305	-0.258115	0.0377236	1083
2021-10-01	-0.297746	-0.862713	-0.38682	-1.33544	-0.939192	-0.933064	-0.00814309	2.04117	1.60745	1.14372	0.000369199	0.835772	1.47268	0.562237	0.253159	1084
2021-10-04	-1.59512	-0.0733327	-0.442193	-0.387165	-1.10471	-0.289305	-0.00814309	0.443485	0.336709	-0.0231234	-0.000175859	-0.208594	0.533325	-1.40187	0.144613	1085
2021-10-05	-0.169952	0.685154	0.250034	-0.490564	0.550057	-0.246237	-0.00814309	0.93987	0.619938	0.512109	0.000232891	-0.137188	0.426544	0.37883	-0.436068	1086
2021-10-06	0.925155	-0.120477	1.18906	0.932715	0.204677	0.777827	-0.00814309	1.55504	0.242018	-0.134353	-0.000175845	0.350808	-0.504062	0.566373	-0.594	1087
2021-10-07	-1.22818	0.242153	-0.275158	-0.844057	0.0439013	-1.35412	-0.00814309	-0.677672	0.0167873	-0.148283	-0.000175859	0.0956181	0.983126	0.873429	0.278824	1088
2021-10-08	-1.2908	0.995092	-0.199712	0.0573799	-0.162765	0.264143	-0.00250725	0.00369533	-0.157452	-0.0857859	-0.000175872	0.635404	-0.37293	3.03344	3.34217	1089
2021-10-12	-0.71512	2.36956	0.58965	0.331499	0.709048	-1.23959	0.273537	0.799699	-0.363323	0.448487	-0.000312181	-0.392272	0.207859	-1.20262	0.114829	1090
2021-10-13	0.166264	-0.335095	-0.500755	-0.516505	-0.94302	-0.117263	-1.26613	0.484653	0.521601	0.29578	9.66908e-05	1.0497	0.594973	-0.00524772	0.0144754	1091
2021-10-14	-1.62195	0.128851	-0.424614	-0.501991	-0.62413	-1.01995	0.65806	-0.0636017	0.797093	0.0340658	-3.96044e-05	0.738665	1.10446	1.42881	2.12111	1092
2021-10-15	0.469208	1.08395	-0.0493267	-0.927394	0.228505	0.0509339	-0.233838	1.56686	0.302036	0.0662981	-0.000312208	-1.64568	-0.264705	0.932395	-0.753883	1093
2021-10-18	-0.47455	-0.164185	-0.273991	0.393233	-0.186613	-0.0328195	-0.290459	0.0876214	-0.557935	-0.722619	-3.96044e-05	-0.349155	-0.0687147	-0.589584	-2.70657	1094
2021-10-19	-0.153874	0.0510265	-0.423092	-1.04043	-0.094452	-1.34623	-2.66131	0.731906	0.535147	0.0694294	0.000369281	0.666915	1.22088	0.462668	2.14966	1095
2021-10-20	-0.494757	-0.0719611	-0.198451	-0.174877	-0.672758	-0.654107	0.63993	0.530249	1.1484	0.596538	-3.96044e-05	-0.148286	0.519242	-0.238757	-0.698161	1096
2021-10-21	0.205646	-0.78082	0.00689386	0.120997	-0.535648	0.402157	-0.0706261	-1.35801	-0.464217	-0.686766	-0.000312181	0.0266224	0.632144	-0.00524772	-0.649181	1097
2021-10-22	0.866465	-0.350401	0.212239	0.921135	-0.188152	0.590441	-0.497017	-0.600234	-0.380351	-0.0180978	-0.000312236	1.70866	0.168639	1.09605	-0.229151	1098
2021-10-25	-0.22909	0.221493	0.43688	-0.408152	0.693974	-0.655652	0.0885471	0.803731	0.986345	0.045738	0.000233027	-0.234421	0.132896	-0.931326	0.339494	1099
2021-10-26	0.280319	0.729465	0.362743	0.0181367	0.275677	-0.0740383	-0.212929	-1.0438	-0.395714	0.110198	-0.000175913	-1.25096	-0.160272	0.227593	-0.411795	1100
2021-10-27	-0.96624	-0.70393	-0.180468	0.431583	-0.465624	-0.384313	0.532015	-0.751594	-0.897077	-1.46259	0.000914271	0.538255	-0.871201	-1.59445	-1.01816	1101
2021-10-28	0.205494	-0.598086	-1.57919	-0.833573	-1.37541	-0.671787	0.00322003	0.750911	1.45055	0.806817	-0.000448327	0.447338	0.265736	-0.364097	0.781898	1102
2021-10-29	0.922363	0.978212	2.49379	1.53093	0.999354	0.751393	0.746708	0.550791	0.463537	0.258165	-0.000312154	-2.15235	-0.173917	-0.487021	-0.605136	1103
2021-11-01	-0.795332	0.220431	-0.7253	0.0961533	-1.37816	-0.507402	-0.450647	-0.52961	-0.389074	0.107152	0.00050544	1.45732	-0.365406	3.06034	1.68769	1104
2021-11-02	1.22293	-0.657614	0.194401	0.877832	0.954704	2.1678	0.122395	0.775928	0.965495	0.485864	9.66227e-05	-0.257219	-0.0195589	-0.699142	-0.650128	1105
2021-11-03	-0.0779069	0.405856	-0.0493752	-0.607337	-0.538817	-0.0327828	0.366184	-0.157188	0.0261356	0.821571	-0.000448327	-1.71187	-0.705495	-1.6557	-0.805057	1106
2021-11-04	0.861085	-0.689247	0.720715	2.16512	0.161025	0.574494	-0.524362	-0.588898	-0.278908	-0.123327	0.000232891	1.95251	0.342487	1.23676	0.895333	1107
2021-11-05	-0.43415	-0.304293	-0.143579	0.0447475	0.160933	-0.137717	-0.0592376	-0.20955	-0.25638	-0.514325	0.000505222	0.292709	0.196572	-0.830438	-0.00555417	1108
2021-11-08	0.0348808	-0.490909	-0.668949	-0.940701	-0.00237872	-0.45151	-0.343274	2.21938	1.17137	1.31834	-0.000856926	1.18178	1.07251	1.57632	0.135964	1109
2021-11-09	0.297524	-0.461018	0.0256389	0.162539	-0.305869	1.24753	0.0714075	-0.25654	-0.301714	-0.298073	-0.000312154	0.242949	0.203398	0.283189	0.674969	1110
2021-11-10	-0.190248	1.55427	1.3608	1.07071	1.09289	0.177916	-0.201368	-0.715395	-0.382772	-0.721427	-0.0001759	1.84783	-0.489959	1.36058	-0.625575	1111
2021-11-12	2.07104	-0.0104221	1.40726	0.77211	1.11065	0.792044	-0.548581	-0.325267	0.087146	-0.0714279	0.000232972	0.0143303	1.79349	-0.513855	0.415481	1112
2021-11-15	-0.803815	0.0666555	0.424966	-0.418281	0.159657	-0.836902	0.202439	-0.237106	-0.411627	-0.210041	-0.00044849	-0.0913068	0.560894	0.728053	1.4831	1113
2021-11-16	0.872859	0.988441	1.68728	0.203629	1.88475	1.08913	0.531981	-1.31205	-1.38936	-1.01256	0.000369281	-0.0942558	0.116165	0.330248	0.148053	1114
2021-11-17	0.591562	-0.470792	0.217859	-0.773852	-0.254146	0.754955	-0.827172	0.0525712	0.293445	0.0592515	0.000232918	0.280998	-0.541595	-1.64418	0.432892	1115
2021-11-18	0.645545	-0.194912	-0.682775	-0.00794249	-0.576309	0.0521951	0.424352	-1.344	-1.20132	-0.704478	0.000232863	-0.322758	-0.179392	0.0520063	0.0891441	1116
2021-11-19	0.0343159	-0.657448	0.773328	0.202967	0.0669482	0.266081	0.0600986	0.385744	1.15353	0.57421	0.000368995	-0.00622952	-0.44414	-1.74668	-1.78395	1117
2021-11-22	0.975347	1.32701	1.12305	0.824876	0.893105	0.459652	-0.127575	-0.740166	-0.86654	-0.70552	-0.000175791	-2.72806	-0.23882	-0.300382	-0.763189	1118
2021-11-23	0.512369	0.417711	-0.0895526	0.323532	0.592794	0.267427	0.378445	0.443398	0.974867	0.433438	-0.00072074	-1.68221	-2.07968	-2.72775	-2.19595	1119
2021-11-24	-1.01543	0.523222	1.34165	0.750155	0.682372	0.526664	0.0316294	-0.205895	-0.292273	-0.520468	-3.96044e-05	-0.487221	-0.791933	-0.50223	-1.40889	1120
2021-11-26	1.81715	-2.9123	-2.04024	0.138584	-2.72942	1.57144	0.031625	-1.4303	-0.997254	-1.30372	0.000505331	1.0894	0.307562	-0.00524772	-1.61813	1121
2021-11-29	0.655584	0.422513	0.796424	0.419258	0.38972	0.0971605	-0.286611	1.57068	1.58421	0.674328	0.000368954	-0.957084	-0.982019	-0.506312	-0.0284029	1122
2021-11-30	0.362226	-0.846121	-0.494116	0.527477	-0.740351	0.66588	-1.34663	-0.403896	0.653303	0.0802323	-0.000175777	1.06877	-0.936063	-1.66273	-0.696995	1123
2021-12-01	-0.623336	-0.647467	-0.684911	-0.744177	-0.488101	-0.972981	-0.00243694	0.0772893	-0.198754	-0.135612	-0.000448204	-0.973574	-0.0320454	0.188314	-0.379138	1124
2021-12-02	0.654452	0.409525	0.333305	0.0452999	0.252482	0.75215	0.687336	-0.329641	-0.292107	-0.264075	9.66091e-05	-1.54277	-1.1929	-0.587786	-0.69146	1125
2021-12-03	0.3434	-0.367827	-0.0315329	0.95613	-0.442378	1.88157	-0.0366202	-1.20714	-1.16011	-0.74163	-0.000312045	0.104436	-0.134399	0.124687	2.08678	1126
2021-12-06	-0.877946	0.64196	0.506973	-0.236321	1.6612	-0.741167	-0.0195345	-1.36057	0.491207	-1.46886	0.000641395	0.630219	-0.0451103	-0.526654	-0.599136	1127
2021-12-07	-2.46365	0.438567	0.6819	0.219932	0.204975	-1.52578	-0.572467	-0.0357581	-0.211691	-0.211105	-0.000311963	0.11242	0.222718	0.90431	1.7941	1128
2021-12-08	0.0342515	0.313945	-1.59044	0.00523294	-1.06251	-1.18646	-1.27679	-0.103674	0.46049	0.702541	9.65818e-05	0.096871	-0.0450134	0.0592047	-0.403657	1129
2021-12-09	0.826542	-0.489354	0.871459	0.65089	1.0124	0.443847	1.91595	-1.35525	-1.32037	-0.0806168	-0.000448204	-0.522323	-0.46686	-0.0697001	-0.700353	1130
2021-12-10	0.144437	-0.289044	-0.512258	-0.989178	-1.24802	-0.684149	-0.503893	-0.265938	-0.887315	-0.973587	-0.000175832	0.167869	-0.93785	-0.0697683	-1.0819	1131
2021-12-13	1.62769	0.067096	0.275929	0.394272	0.182872	1.16106	-0.15643	-0.255765	-0.562859	-0.320045	0.000369036	0.439476	0.821699	-0.654235	-0.191605	1132
2021-12-14	1.14456	0.299057	0.603802	0.112704	0.575187	0.4248	0.0603044	0.727527	0.316324	0.455564	-0.000584486	-0.720749	-0.148179	-1.59158	-3.40577	1133
2021-12-15	1.04855	0.283028	0.122614	0.153112	0.527736	-0.492159	0.00326357	0.180622	0.637957	0.223873	0.000232863	-0.561175	-0.967368	-0.00524772	-1.18715	1134
2021-12-16	-2.62137	-0.272897	-0.917147	-1.48139	-0.970726	-1.44387	-0.00243989	-0.623229	-0.295924	-0.372418	-0.000448327	1.60374	0.941126	1.25398	2.3984	1135
2021-12-17	1.05562	-0.195894	0.622484	0.753684	0.275069	0.919585	0.413645	-0.740567	-0.367868	-0.155904	9.66499e-05	0.673901	1.17791	0.321853	2.56666	1136
2021-12-20	2.0094	-0.196059	-0.397284	0.63584	-0.580199	0.663124	0.0374263	0.29513	0.226671	1.25818	-0.000312127	-0.743759	-0.908899	-0.595298	-0.939548	1137
2021-12-21	-0.255492	0.992987	0.507416	-0.41095	0.991184	-0.512968	-0.236047	0.881305	0.294967	0.967394	9.66635e-05	-0.208238	1.12135	0.845227	2.04437	1138
2021-12-22	-1.50719	0.143389	-0.992999	-1.22418	-0.92614	-1.63472	-0.12785	-0.188171	-0.188074	0.0679647	-3.96044e-05	-0.110993	-0.233326	0.640989	0.12903	1139
2021-12-23	-0.640021	0.281434	0.0836455	-0.858278	-0.326604	-0.549081	-0.00244186	0.934568	0.508361	0.520047	-3.96044e-05	0.699264	0.369652	1.39283	1.22975	1140
2021-12-29	0.0155634	0.816408	-0.319114	-0.854103	-0.838775	-0.0333285	-0.0993735	-2.03541	-2.12411	-2.6417	-0.000312154	-0.717337	0.0304691	-0.57332	1.34114	1141
2021-12-30	-0.605151	0.279431	0.371287	-0.324177	-0.0489134	-0.418857	0.254083	0.264045	0.340157	0.327903	-0.0001759	0.650309	-0.194849	-0.195787	0.412897	1142
2022-01-04	-1.46971	1.41701	0.429588	-0.57305	0.207187	0.395099	-0.0366367	-0.665471	0.324566	-0.28142	-0.000175913	0.281815	0.293083	1.00415	-1.70556	1143
2022-01-05	0.0525099	-0.343771	-0.741866	-0.374882	0.183773	-0.418857	-0.470051	-1.25181	-1.19383	-0.888729	9.67044e-05	0.838109	0.390524	0.74099	0.189247	1144
2022-01-06	0.456662	-0.222944	0.544203	0.450967	0.833221	1.96875	1.0289	-0.219077	-0.651126	0.114855	-0.000175913	-2.28141	-2.06157	-1.2541	-1.05534	1145
2022-01-07	-1.51267	-0.283925	-0.970785	-0.571387	-0.0949038	-0.401386	-0.309835	-0.865064	-1.11157	-0.321176	-3.96044e-05	0.144928	-0.0323935	-0.448456	1.0874	1146
2022-01-10	0.661459	-0.741343	0.581466	0.214697	1.43003	0.334301	-0.0821812	0.101948	-0.619196	-0.42562	0.000369281	0.0442268	0.529738	-1.87649	-0.156827	1147
2022-01-11	-1.49963	0.339882	-0.663293	-0.713767	-0.324686	-0.617188	-0.127775	0.423464	0.775486	0.495063	9.66635e-05	0.710763	0.322667	1.03425	0.446604	1148
2022-01-12	-1.80804	-1.00281	-1.2893	-0.983531	-2.36766	-1.70711	-0.892361	0.549105	0.641824	0.446787	9.66499e-05	0.825386	0.370854	2.20873	0.186714	1149
2022-01-13	-0.35794	-1.06986	-0.619366	-0.331769	-0.726633	-0.480692	0.0775206	-0.740014	-0.70665	-0.548537	-0.000175859	-0.116111	1.22194	-0.379126	-0.563471	1150
2022-01-14	1.24772	-0.28782	0.956478	0.705877	0.745203	1.6352	-0.413796	0.216227	0.324985	0.0751065	9.66499e-05	0.102641	-0.376824	0.181978	-0.680822	1151
2022-01-18	-0.263394	1.06571	1.49658	1.07448	0.835707	0.720998	-0.00242652	-0.419152	-0.798525	-0.409461	-0.000312127	-0.395026	-0.47865	0.181405	0.777596	1152
2022-01-19	-0.674441	-0.516972	-0.184664	-0.478031	-0.281316	-0.83075	-0.454306	-0.413689	-0.443444	-0.266795	9.66635e-05	0.527966	2.08397	1.95097	1.47577	1153
2022-01-20	-0.695121	-0.333497	0.198452	-0.216367	0.0674757	-0.869209	-0.242885	-0.569438	-0.467308	-0.348027	-0.000312154	1.04076	1.05099	2.41283	1.28344	1154
2022-01-21	1.49195	-0.580982	-0.184664	1.05048	-0.841504	1.42684	-0.128435	-2.4954	-2.64331	-1.65712	0.000369199	-0.512582	0.203903	-0.527895	1.43914	1155
2022-01-24	2.70059	0.128538	0.697294	1.51862	0.627356	2.11681	-0.472502	0.0778096	-0.904131	-0.565151	9.66363e-05	-0.410175	-0.621366	-1.72046	0.669489	1156
2022-01-25	-0.943411	0.0667205	0.526137	-0.62801	1.13596	-0.819	-0.277858	0.109289	0.0839387	0.0910661	0.000369036	0.878559	-0.976539	0.114603	0.526604	1157
2022-01-26	-0.743166	0.666834	0.0839245	-0.271103	0.460697	-0.641568	-0.301039	-0.140865	-0.01002	0.00100031	-0.000175804	-0.725936	0.448973	1.93904	2.4143	1158
2022-01-27	2.06483	1.71681	2.68132	1.7361	2.43491	2.6766	2.6879	0.168459	-0.284869	-0.257531	-0.000720808	-1.8033	-1.695	-1.82992	-0.507077	1159
2022-01-28	0.804581	-0.421771	-0.363284	-0.419134	-0.436753	1.00565	-0.418983	0.294454	0.785234	0.0351781	0.000232918	-1.18278	-1.69488	-1.09033	0.868132	1160
2022-01-31	-1.08576	-0.0105987	-1.00301	-0.285933	0.135463	-1.46974	0.0204025	0.389147	0.869728	0.105432	9.66363e-05	0.379416	-0.032248	1.13956	2.00837	1161
2022-02-01	-0.113097	-0.71316	-0.515634	-0.865413	-1.63407	-1.01993	-0.00814309	0.0712677	0.58166	0.201537	9.66227e-05	0.226187	0.94934	1.23556	-1.02599	1162
2022-02-02	0.0157373	-0.654415	-1.1498	-0.782579	-1.02001	-0.339181	-0.00814309	-1.12068	-0.683551	-0.620985	-0.000175832	0.177066	-0.269645	-0.357196	0.286154	1163
2022-02-03	-0.186817	0.770988	-2.4023	-0.478849	0.646128	-0.403734	-0.00814309	0.188032	0.0408213	0.164758	-3.96044e-05	-0.717909	-1.08205	-0.655808	-0.435257	1164
2022-02-04	1.46645	0.493214	-0.562806	0.777774	0.828645	1.64939	-0.00814309	2.36537	1.74961	0.938783	0.000369036	0.675113	0.349492	-0.602747	-1.59081	1165
2022-02-07	-1.36128	-0.224125	0.405527	0.136506	-0.0942523	-0.975829	-0.00814309	1.12994	0.760544	3.12386	-0.000175804	0.480845	0.874035	-0.0653208	-1.04215	1166
2022-02-08	0.438827	0.781137	0.349163	-0.244102	0.0439907	-0.491619	0.277189	0.0530728	-0.162961	0.672666	0.000368954	0.490225	-0.0195589	0.830439	0.561451	1167
2022-02-09	-0.628373	-0.299496	-0.354374	0.162667	-0.232682	-1.09672	-0.242099	0.126041	0.640541	-0.125334	-0.000175777	0.25784	0.946278	0.0540084	0.10329	1168
2022-02-10	-0.519216	0.581697	-0.978779	-1.25035	-0.0482778	-1.34664	-0.539383	-0.48931	-0.944697	-0.722645	-0.000175791	0.396819	0.237707	-0.183189	0.444885	1169
2022-02-11	0.569151	0.0802606	1.58231	0.461971	0.597125	1.45266	0.0718783	-0.636556	-0.838513	-1.14505	-0.000312018	-0.303255	-1.15531	-0.243313	-1.2425	1170
2022-02-14	0.990075	-0.313989	1.88186	1.11937	0.250982	1.07387	0.146134	0.0344467	-0.0231615	0.684299	-0.000175832	2.01364	1.92933	0.94149	1.19553	1171
2022-02-15	0.180709	-0.147309	-1.08561	-0.296928	-0.140053	-0.555702	-1.04936	0.967936	1.35527	0.777494	9.66227e-05	-1.08758	-1.00408	-1.43092	-0.692793	1172
2022-02-16	-1.01305	-0.375526	-0.33697	-0.597553	-0.878283	-0.683586	-0.117013	-0.382591	-0.369856	-0.264728	-3.96044e-05	0.773392	0.505199	1.65483	0.501944	1173
2022-02-17	0.162963	-0.60511	0.33164	-0.504228	-0.372217	-0.271117	0.0778099	-1.80526	-1.2868	-1.17394	9.66091e-05	1.74007	0.18658	2.06484	1.61912	1174
2022-02-18	0.952029	0.0504853	0.715377	0.514694	0.206054	0.442071	-0.753745	-0.355403	-0.709091	0.278564	-0.000312045	-0.0445158	0.426541	0.66946	-0.213859	1175
2022-02-22	-0.22264	-0.239647	-0.280608	-0.15168	-0.11787	-1.13353	0.0435249	-1.04601	-0.920636	-1.14932	0.000232836	0.320907	0.55402	-0.229322	0.974616	1176
2022-02-23	-0.35138	0.248999	0.505472	0.555035	-0.55843	-0.419701	-0.732165	-0.653405	-0.405475	-0.500247	-0.000175818	0.210791	0.2059	0.218827	0.0962738	1177
2022-02-24	2.24559	0.476921	3.13946	2.58041	2.03041	2.40772	0.847885	0.605622	0.0862077	-0.0286089	0.000232809	1.74304	2.7768	0.551364	4.13479	1178
2022-02-25	-1.82888	0.232596	-2.0672	-0.618871	0.204776	-1.85162	-0.66291	0.448787	1.03611	1.30155	-0.000175804	-2.99587	-2.56776	-2.60879	-5.92997	1179
2022-02-28	-1.43709	-0.802304	0.721868	-0.153762	-2.17235	-0.934337	-0.497116	2.09838	0.880281	0.177616	-0.00058454	1.3881	0.309652	0.455598	3.21098	1180
2022-03-01	0.862713	-0.392428	2.36162	1.3479	0.18333	0.266426	0.176018	0.575079	0.27016	0.0154099	0.000232891	0.6391	0.656399	0.052114	2.87056	1181
2022-03-02	-0.960306	1.07162	0.0264611	-0.620836	0.715479	-0.738703	0.532291	-0.305777	-0.195012	-0.284791	-0.000175845	0.315389	0.979606	-0.120025	-1.4975	1182
2022-03-03	0.329263	0.0956752	0.967855	0.524581	-0.256596	-0.714088	-0.0943286	-0.796718	-0.683412	-0.326202	-0.000312127	0.00908409	0.513032	1.30183	2.58569	1183
2022-03-04	1.55845	-1.58154	2.79606	1.50519	-0.465624	-1.00654	-0.04837	-1.86047	-1.34017	-0.736592	9.66635e-05	0.83143	-0.381634	0.387064	2.87753	1184
2022-03-07	0.216885	1.13461	1.04463	1.34171	1.96059	0.855453	0.0263374	-0.694506	-0.882354	0.108088	-0.000175872	1.92926	1.30437	1.91933	0.681261	1185
2022-03-08	2.19973	0.32384	-0.412789	0.195043	0.823948	1.2448	-0.100098	0.366731	0.527101	-0.015686	-3.96044e-05	3.10244	0.817166	1.28023	-0.210396	1186
2022-03-09	-1.4747	0.323145	-3.71458	-0.793313	-0.851025	-1.31097	-0.0311355	1.70565	0.913604	0.774879	0.000232918	-2.77155	0.100537	-2.38304	-0.418328	1187
2022-03-10	-0.733036	0.246795	1.22716	0.708849	0.709641	-0.815693	0.210226	-1.42425	-0.789772	-0.552244	9.66363e-05	0.368641	-0.523466	-1.06138	-0.562452	1188
2022-03-11	-0.900492	1.52617	1.3929	0.616388	0.753108	1.11038	1.00727	-0.440708	-0.354353	1.1296	-0.000448367	-1.03624	-0.661325	-1.76866	-2.37123	1189
2022-03-14	0.931723	1.34892	-0.82577	0.263908	0.7506	1.6976	1.45548	0.483349	0.17785	-0.509518	0.000232918	-1.42161	-0.646116	-1.05306	-6.28221	1190
2022-03-15	0.581713	0.256739	0.105853	-0.28065	1.31448	0.677218	0.282734	-0.267351	0.148303	-0.177972	9.66363e-05	-2.33375	-1.70934	-1.97426	0.731696	1191
2022-03-16	-1.1729	0.404592	-0.428191	-0.415946	-0.00168005	-1.19438	-1.07011	0.963554	0.940469	0.415869	-0.000175845	-0.0788362	0.694419	0.477956	0.383423	1192
2022-03-17	-1.93538	-0.0703221	-2.23378	-0.847647	-1.45493	-2.91883	-0.299872	-0.160829	0.197321	-0.00458974	-3.96044e-05	2.00702	0.87744	0.593424	0.62914	1193
2022-03-18	-0.0766148	1.03855	1.30131	-0.129769	-0.252645	-0.305898	0.849215	0.408437	0.710096	0.0269305	-3.96044e-05	-0.831402	-0.25663	0.587606	0.928468	1194
2022-03-21	-0.984645	-0.0553229	-0.0717756	-0.426086	-0.756141	-0.368155	-0.333701	-0.450877	-0.309413	0.63466	-0.000312127	-0.095465	-0.473864	0.171491	0.188404	1195
2022-03-22	0.442508	2.18607	0.518755	-0.760471	0.524091	-0.409105	0.608456	0.670093	0.413334	-0.0402923	9.66635e-05	-1.1759	0.0943567	-1.0136	-0.704853	1196
2022-03-23	-0.912482	0.497414	0.421202	0.622912	-0.139017	-1.25965	0.33396	0.230716	0.338245	-0.0115609	-3.96044e-05	0.883248	-0.179104	0.293062	0.353714	1197
2022-03-24	-0.43095	1.50587	-0.0918227	0.395746	-0.207781	-0.156801	-0.293207	0.512923	0.366089	0.0530573	9.66499e-05	1.8209	0.661091	-0.303557	-0.250168	1198
2022-03-25	-0.375727	-0.169775	0.421805	-0.129524	0.020946	0.0709172	-0.0765917	0.109748	-0.0637413	-0.326529	-3.96044e-05	-0.68825	0.664215	-0.545909	-0.218738	1199
2022-03-28	0.705628	1.79338	0.165164	1.38457	0.843215	0.361251	0.311173	1.2991	1.14453	0.58217	-0.000175859	-0.99305	-1.6356	-1.10116	-4.24518	1200
2022-03-29	-0.692302	-0.940263	-2.49213	-0.455736	-0.915779	-0.405712	-0.458689	0.111463	0.328281	-0.107154	9.66499e-05	-1.58831	-0.630324	-1.81337	-2.67929	1201
2022-03-30	-0.338905	-0.945049	-1.14436	-0.319438	-1.58792	-0.13604	-0.950963	-0.226243	-0.113017	0.0280429	-0.000175859	1.3015	0.246293	1.74141	2.70462	1202
2022-03-31	-0.245808	-0.790719	1.37347	-0.0353093	-0.487218	0.1744	-0.448965	-0.794666	-0.552	-0.762531	-3.96044e-05	0.414354	0.118657	-0.561239	0.0672338	1203
2022-04-01	0.464676	1.64391	0.988309	0.519452	1.05908	0.112431	1.31843	0.323546	0.832019	0.177219	9.66499e-05	-0.772164	-0.307886	0.734954	1.14184	1204
2022-04-04	-0.301665	0.117361	1.01253	-0.0218684	0.020946	-1.16826	-0.04239	0.108555	0.275802	-0.0486293	-0.000312127	-0.00225473	-0.0773995	-0.621457	-0.467826	1205
2022-04-05	-0.733077	1.08716	1.41469	0.208594	0.847826	-1.01669	-0.00814309	-0.592305	-0.58261	-0.19063	-3.96044e-05	0.721669	0.00358436	-0.253485	-0.0592296	1206
2022-04-06	0.933335	0.286809	0.166092	0.263158	0.77611	1.13701	-0.173715	-1.22039	-1.24219	-0.987418	9.66635e-05	-0.836479	-0.976211	-1.13499	-0.983903	1207
2022-04-07	1.67275	0.116088	0.26584	0.304351	0.180789	1.43629	0.0489593	0.0908587	0.277651	0.4526	-0.000175872	0.0740143	0.250392	-0.386525	0.323159	1208
2022-04-08	-0.281074	0.696227	0.525713	0.386658	0.0437709	0.216924	0.237295	-0.658791	-0.21495	-0.58572	9.66635e-05	0.454071	0.551332	0.943515	3.21183	1209
2022-04-11	0.831544	1.71749	-0.0130837	-0.00840349	-0.550411	0.843913	0.27134	-1.56149	-1.20422	-1.14004	-3.96044e-05	0.51607	0.957421	0.74328	0.876287	1210
2022-04-12	-0.24336	-0.446034	0.466842	0.0325069	-0.116408	-1.26266	-0.241982	0.274352	0.240472	0.349711	-0.000175872	0.465807	-0.122216	-1.06839	-2.46459	1211
2022-04-13	-0.262153	0.33838	-0.433077	-0.553047	0.775299	1.02974	0.145865	0.527366	0.456408	0.122268	-3.96044e-05	0.828434	1.41225	0.809407	0.618842	1212
2022-04-14	0.608504	0.546979	1.57083	0.277346	2.0874	0.532537	0.544607	-0.706894	-0.551435	0.0363278	-0.000175886	-0.801232	0.0138329	-0.192282	-0.0917103	1213
2022-04-19	-0.187707	3.60483	0.147799	0.59169	1.28272	0.702941	0.873375	0.805371	0.405528	0.830709	-3.96044e-05	-0.0114692	0.556151	2.08162	-0.404217	1214
2022-04-20	-2.38417	-1.10856	-1.35805	-0.622068	-0.271299	-1.73029	1.45443	-0.122743	-0.171813	-0.431119	9.66772e-05	-0.859286	-1.61695	-1.59463	0.80502	1215
2022-04-21	0.669583	1.15249	0.367368	0.182289	1.45584	1.58015	1.75272	-0.531649	-0.543995	-0.36552	-0.000175886	-0.381218	-1.29105	-0.440328	0.452961	1216
2022-04-22	3.51363	0.192512	0.991225	2.66863	1.22416	2.51415	2.85192	-0.478943	-0.150848	-0.303402	-0.0001759	-0.173979	-0.718826	-2.42283	-0.464069	1217
2022-04-25	1.07855	-1.56006	1.76565	2.09228	-0.0234965	2.36022	3.18966	0.348101	0.2089	-0.493516	-3.96044e-05	-2.70229	-2.00005	-1.51647	-5.28293	1218
2022-04-26	0.380966	-0.425291	0.861072	1.14251	0.575812	0.0315873	-0.190909	-1.36075	-1.16043	-1.03739	-3.96044e-05	0.498452	0.596249	-0.138445	1.35054	1219
2022-04-27	0.617122	1.44349	2.30126	0.993964	1.89675	0.445253	0.229989	0.599277	0.429298	0.171317	-3.96044e-05	-1.13604	-0.344747	0.986712	1.25256	1220
2022-04-28	0.0155335	3.36002	1.01835	1.48444	0.657167	1.01613	3.56167	0.233968	0.243485	-0.2195	-3.96044e-05	0.103018	-1.17869	-0.997208	-0.0967614	1221
2022-04-29	-0.531173	-1.50759	-0.757293	-1.72874	-0.000961026	-0.537668	-0.902807	-0.712831	-0.733942	-0.690651	-3.96044e-05	1.25687	0.678741	1.11776	1.12911	1222
2022-05-03	0.635028	0.312017	0.110005	0.78485	1.37494	0.0318689	-0.0136386	-0.553265	-0.243463	-0.179441	-3.96044e-05	-2.45535	-2.03961	1.92747	-1.48867	1223
2022-05-04	-0.366857	-0.187935	-0.137449	0.332271	0.97665	-1.01498	-0.00814309	1.08159	0.900121	0.853452	-0.000175913	-0.406965	-0.107931	0.625618	-0.0608433	1224
2022-05-05	0.579755	0.567763	0.667529	2.1962	0.993956	1.21014	2.48924	-1.88521	-1.17184	-1.05397	-3.96044e-05	1.61223	0.783365	1.23724	0.049735	1225
2022-05-06	0.741445	-0.106671	-1.33292	-0.138796	-0.324504	-0.0556886	0.624424	-0.378197	-0.369038	0.0623278	-3.96044e-05	-0.628669	-1.10112	-1.62548	-2.31627	1226
2022-05-09	1.29836	0.00110362	0.274197	0.134853	1.50671	2.23832	3.4838	-4.03906	-3.2003	-2.83102	9.67044e-05	-1.30424	-1.61599	-1.1527	-1.17146	1227
2022-05-10	1.21946	-0.241534	0.583744	0.322482	0.492499	1.41684	0.250786	0.613782	0.797349	0.65031	0.000232972	-0.261609	-0.0195589	2.45417	0.174449	1228
2022-05-11	-1.56743	-0.0393327	-0.116846	-0.0524908	-0.880199	-1.55166	-0.855743	-1.48619	-2.0167	-2.82846	-0.00468084	-0.371	-0.22884	-0.751486	-0.205606	1229
2022-05-12	2.0098	-2.88184	3.35192	1.73058	2.09643	3.17374	3.6167	-0.120938	-1.07469	-1.05077	0.00200995	-0.934988	-2.15568	-0.824108	-2.82768	1230
2022-05-13	-2.26792	1.51672	-0.703811	-0.634665	0.233768	-1.50065	0.0988681	0.18507	0.425168	1.22028	0.000642895	-1.57905	-0.415434	-1.22217	0.421823	1231
2022-05-16	-0.835172	-0.134607	-0.201695	-0.400778	0.318539	-0.572102	-0.157968	0.374255	0.0786011	-0.0238282	9.68545e-05	-0.176764	0.877445	0.123999	0.794411	1232
2022-05-17	-0.801762	0.191617	-2.31572	-2.83968	-2.04954	-1.56984	-2.64552	0.383763	0.522966	0.43271	0.000233272	0.877927	1.60233	0.764532	2.20624	1233
2022-05-18	-0.0208638	-1.51265	0.792145	1.03448	-0.601994	0.320656	0.955565	-1.36973	-1.53258	-1.05816	-0.00044894	-0.9149	-0.321821	-0.58167	0.0141961	1234
2022-05-19	-0.312169	-0.849671	-1.9099	-1.53642	-3.73355	-1.31576	-2.33293	1.17278	0.88152	0.455679	0.000642554	1.93918	-0.296942	0.123318	-2.02915	1235
2022-05-20	0.288633	0.304152	0.582216	0.175868	0.45839	0.539278	-1.02688	-0.893076	-0.533892	-0.349837	-0.000312427	-0.634857	1.21171	0.633546	0.489278	1236
2022-05-23	-0.969008	-0.135773	-2.22422	-1.11512	-1.84443	-1.4846	-2.3545	-0.115397	0.0786969	-0.195115	-3.96044e-05	1.24837	0.122805	0.564003	-0.00555417	1237
2022-05-24	1.01825	-1.71085	-1.5353	0.387344	-1.46101	0.382407	0.210256	0.370119	0.021668	0.0857574	-3.96044e-05	0.585985	-0.434699	-0.893058	-0.149266	1238
2022-05-25	-0.0572497	1.01193	1.75283	0.0760845	0.906933	0.317459	2.09268	-0.131517	-0.34417	-0.105852	-3.96044e-05	-1.22289	-0.267484	-0.647403	-0.0879013	1239
2022-05-26	-0.895937	-0.136248	-1.35452	-0.603169	-0.909437	-0.275406	2.50122	-0.305472	-1.37448	-0.479025	9.68135e-05	0.00886987	0.124108	-0.19922	-0.00555417	1240
2022-05-27	-0.881032	-0.150131	0.331232	-0.432094	-0.423526	-1.69228	-2.17036	-0.513633	-0.691426	-0.411352	-3.96044e-05	0.156307	0.98893	0.83088	1.0322	1241
2022-05-31	-1.86175	1.88398	-0.438946	-0.149689	-0.090317	-0.726523	-1.44773	2.30213	1.95791	1.29887	0.000233191	-0.828143	-1.32886	0.503654	-0.247384	1242
2022-06-01	0.569512	2.09311	1.73454	2.15803	1.66173	0.507536	0.7694	-1.491	-1.13605	-0.791712	0.000505822	0.314307	-0.440728	1.68161	-0.37099	1243
2022-06-06	-1.85348	1.93438	-1.07196	-1.01776	1.03456	-0.941269	-1.77224	1.09061	0.349238	0.129405	-0.000585031	0.0828422	1.65962	2.35182	0.0148333	1244
2022-06-07	-0.374599	1.27776	0.0475081	-0.701733	0.920339	-0.119588	0.760621	-0.220211	-0.454933	0.132447	9.67726e-05	0.0885751	-0.444438	-1.32366	-1.35225	1245
2022-06-08	-0.487064	1.99022	-0.864644	0.528117	0.436453	-0.141031	0.807908	-0.72259	-0.225323	-0.264	-3.96044e-05	0.144373	-0.460645	-0.308903	-0.00555417	1246
2022-06-09	2.35393	-0.0258433	1.7127	0.657458	0.631799	2.11117	0.480609	-0.126851	-0.0790105	-0.0368558	-0.000175981	-0.531402	0.00648189	-0.987228	-0.620935	1247
2022-06-10	2.4035	0.144395	2.77674	2.59509	2.36082	1.43446	0.891611	-0.812619	-1.24768	-0.663657	-3.96044e-05	-0.935413	-0.911678	-1.06622	-0.198425	1248
2022-06-13	1.2548	-0.117489	1.76917	2.32647	1.73776	2.3843	2.41442	-5.80773	-5.40831	-2.71663	-0.000312399	-0.00247136	-0.0989487	-1.21329	-1.13801	1249
2022-06-14	1.48297	0.979643	0.423632	2.34239	1.08697	1.35804	-0.734832	-0.340099	0.0250376	0.395958	-3.96044e-05	-0.804018	-0.886766	-1.10679	-1.12471	1250
2022-06-15	0.664597	-0.534396	0.591674	-0.674091	0.127256	-1.3818	-1.44967	0.367766	0.337886	0.843578	0.000233191	0.27354	0.582215	0.774369	1.22386	1251
2022-06-16	-0.814464	-3.78757	-2.96329	-4.13231	-7.7282	-1.17021	-0.538681	-2.32012	-2.49935	-1.26551	-0.000448817	0.111316	-0.0861104	-0.134494	0.0164617	1252
2022-06-17	2.31696	4.56966	1.20669	2.03283	1.20802	1.66156	0.695465	0.0128544	0.246876	0.302106	-0.00113144	0.842626	1.06221	-0.00524772	-0.137827	1253
2022-06-21	-2.28616	1.41092	-1.54332	-1.09833	-1.23227	-1.17405	-1.5253	0.247608	0.565527	0.316704	0.000779354	-0.130251	-0.478784	-0.329566	0.542793	1254
2022-06-22	0.0876539	-0.283852	-0.71277	-0.0381885	-0.97367	0.903718	0.550692	-0.875092	-1.21891	-0.320679	-3.96044e-05	0.0417062	-0.682069	-0.46221	-0.443645	1255
2022-06-23	0.844678	-1.75131	1.65536	0.58506	-0.178536	0.909148	-0.0244077	1.17883	1.42251	0.516775	9.68409e-05	-0.0502	-0.649407	-0.796665	0.36712	1256
2022-06-24	-1.08494	0.62482	-0.736462	-0.473261	-0.801113	-1.20144	-0.561574	0.082266	1.11128	1.1708	0.000369649	-1.03247	-0.902236	-0.538621	-0.46641	1257
2022-06-27	-0.890257	0.0261058	-1.2674	-0.457534	-0.380125	0.0775824	0.105867	-0.576724	-0.507139	-0.546731	-0.000312427	-0.00234504	1.59949	-0.139323	1.25491	1258
2022-06-28	0.215009	1.17766	1.38428	1.52822	0.28841	0.570879	0.918899	-0.540649	-0.705688	-0.639655	-0.000176036	-0.487375	-0.621333	0.993207	-0.936311	1259
2022-06-29	-0.383744	0.373499	1.18561	0.720451	-0.469662	0.640711	-0.403608	-0.233832	-0.69707	-0.348254	-3.96044e-05	-0.131205	-0.722935	0.586074	2.41732	1260
2022-06-30	0.17887	-1.07121	0.172841	-0.155577	0.221786	-0.417258	-0.094878	-0.255433	-0.503583	0.0770399	-3.96044e-05	-0.0982127	-1.56461	-1.72939	-2.16655	1261
2022-07-01	0.794438	-0.804217	1.25555	1.67891	1.64302	2.61932	0.0948522	-0.803428	-0.192012	-0.770956	9.68272e-05	-1.23406	-1.98264	-2.40595	0.556178	1262
2022-07-05	2.6766	0.791359	3.26622	1.72461	1.49891	0.33164	1.03102	1.00644	1.11339	0.460772	-0.000176036	-1.60983	0.312345	-0.285727	-0.350325	1263
2022-07-06	-0.217317	-0.103508	1.72981	0.377977	0.54788	-0.011879	-0.668098	0.342957	0.726415	0.2423	-3.96044e-05	-1.14904	-1.83223	-0.0755696	1.2517	1264
2022-07-07	-1.15079	0.400891	0.306071	-1.28856	0.459064	-1.22226	-0.360249	1.08446	0.682006	0.377204	0.00050604	-0.449012	0.586185	0.205475	0.266368	1265
2022-07-08	-0.741163	0.193585	-0.399033	-0.616	0.916282	-0.71549	-0.333467	-0.0776558	-0.330739	-0.1056	-3.96044e-05	-0.663771	-0.684745	0.622588	2.00821	1266
2022-07-11	0.573914	1.42579	1.93645	1.92026	0.434585	2.45333	1.23735	-1.81382	-1.77192	-1.06808	-0.000175995	0.0598215	0.01017	-0.353248	1.62893	1267
2022-07-12	0.428835	-0.807976	0.416446	0.0350863	0.412075	-0.517235	0.310666	-0.765881	-0.941476	-0.171953	-0.000448858	-0.638181	-1.05426	-1.70385	-0.581858	1268
2022-07-13	-0.848453	0.820244	-0.25186	-0.203635	-0.587788	-0.332615	-0.326952	0.982396	1.16985	0.473286	0.000642417	-0.438594	0.252176	-0.654619	-2.12951	1269
2022-07-14	2.57904	2.00852	1.15206	1.38231	0.998421	0.952323	1.97043	0.315562	1.08438	0.373254	-0.000175981	-1.57654	-0.609962	-0.734972	-2.07362	1270
2022-07-15	-1.05701	-0.494199	-1.3106	-0.444987	-1.13077	-1.1362	0.115496	0.206429	0.49661	-0.0123061	0.000505822	0.296094	-0.939963	1.44557	-1.15704	1271
2022-07-18	-2.19803	-0.457328	-1.51659	-1.9623	-0.240687	-1.0373	-0.788314	1.695	4.20014	1.17537	9.6718e-05	0.769095	1.26489	0.778238	0.192271	1272
2022-07-19	-0.581936	-0.394714	-1.65457	-0.483265	-1.75353	-1.50369	0.0457157	0.805882	-0.474969	0.248994	9.67044e-05	-0.434839	0.0408905	1.32479	-0.0274877	1273
2022-07-20	-0.220266	0.254061	0.452962	0.493731	0.855259	0.145665	0.583777	-0.236274	-0.282829	-0.419296	-3.96044e-05	-0.29239	-0.383219	-0.912131	0.0383013	1274
2022-07-21	0.178673	-0.305747	0.432574	0.316796	-0.593494	0.0106404	0.609652	-0.109955	0.563072	0.12589	9.66908e-05	-0.321721	-1.60712	0.0649932	-0.00555417	1275
2022-07-22	-0.438132	-2.35868	-0.588825	-0.750474	-1.74443	-1.17858	-0.84107	-0.513914	-0.472749	-0.364251	-3.96044e-05	1.9671	1.65913	0.9006	1.52173	1276
2022-07-25	-0.29343	0.746653	0.304549	-0.334528	0.861323	-0.145936	-0.013523	-1.4393	-1.119	-0.867032	-0.0001759	-1.19349	-0.186746	-0.0744527	1.20127	1277
2022-07-26	0.832289	-0.154357	2.03754	0.0938035	-0.354602	0.323481	0.620768	-0.105902	0.108519	0.0443876	9.66908e-05	0.0198453	-0.677848	-0.213335	-0.479887	1278
2022-07-27	-0.18393	0.858993	0.178765	0.138172	0.374422	0.391511	-0.255278	1.67014	1.9818	0.805777	0.000232945	-0.434616	0.669164	0.272045	0.734477	1279
2022-07-28	-0.83828	-3.72284	-1.17199	-1.45165	-1.79685	-1.12983	-0.572885	0.796859	0.864659	0.489739	-0.000175872	2.4308	1.65937	0.545584	1.06023	1280
2022-07-29	-0.622222	-1.60051	-0.82518	-0.828193	-1.20706	-0.323468	-0.18043	-0.120986	-0.0837289	-0.245783	0.000232918	-0.0593889	2.1259	-0.0738303	0.468115	1281
2022-08-01	0.525873	-1.94759	-1.43632	-1.37518	-0.584492	-1.11962	1.28739	-0.525833	-0.939904	0.376767	-0.000312127	1.12337	0.939798	1.28482	1.70477	1282
2022-08-02	0.452012	0.665757	1.62053	0.875827	1.29708	1.83133	-0.948419	-0.321948	-0.0185943	-0.297682	-0.000175886	0.398587	-0.21576	0.463245	0.219697	1283
2022-08-03	0.251566	2.4259	1.03224	1.26057	1.95411	0.480372	0.346761	-0.213185	-0.170985	-0.0985207	-3.96044e-05	-1.19381	-1.19681	-0.87819	-3.39917	1284
2022-08-04	-0.311422	-1.2079	-1.5931	-0.126556	-1.42171	-0.81657	-0.438375	-0.254564	-0.148549	0.0191545	-3.96044e-05	1.29889	0.960811	0.867695	1.15709	1285
2022-08-05	1.62728	2.65513	1.0936	1.18013	1.57417	1.44408	0.647757	0.623787	1.27832	0.169868	-0.0001759	-0.663978	-0.600066	0.986712	0.348675	1286
2022-08-08	-1.59627	-0.806292	-0.782044	-0.539121	-1.97815	-2.02421	-0.556437	0.429138	0.355297	0.0555247	0.000232972	0.609674	0.363389	0.517275	2.37353	1287
2022-08-09	0.469299	0.260724	-0.397126	0.13749	-0.425857	0.388506	0.0994308	-0.684338	-0.760941	-0.434994	-3.96044e-05	0.629999	1.11411	0.124687	0.270893	1288
2022-08-10	-1.95115	-3.13785	-2.33853	-2.27341	-2.56652	-2.79314	-1.5981	0.720154	1.38799	0.469085	-3.96044e-05	-0.0653252	-0.47871	0.124411	-0.11591	1289
2022-08-11	-0.533576	0.0801074	-0.0141214	0.223068	-0.40959	-0.448804	1.15133	-0.0759296	0.207982	-0.0708011	0.000232918	0.0471319	0.273055	1.59265	0.869097	1290
2022-08-12	0.711025	1.17487	1.71575	1.43503	0.903739	0.271982	-0.115845	0.376014	0.642812	-0.0551679	-3.96044e-05	-0.333004	-0.789132	-0.639393	-0.331369	1291
2022-08-15	1.96241	-0.605382	1.51592	0.621542	0.449703	1.30502	1.55041	-0.322601	-0.531316	-0.178626	-0.000448408	-1.00142	0.163279	-1.03379	-1.92135	1292
2022-08-16	-0.310895	1.6156	0.262979	0.00523294	1.30206	0.761498	0.848894	-0.277371	-0.241759	0.0371432	-3.96044e-05	-0.160744	-0.5982	-0.591518	-0.677442	1293
2022-08-17	1.04725	1.3023	0.220529	0.889398	0.714473	2.15183	-0.382848	-0.539122	-0.416829	0.0634545	-0.0001759	-0.524694	-0.647134	-0.20193	0.322164	1294
2022-08-18	0.23201	-0.168592	1.07823	0.893819	0.22187	-0.370862	0.259543	-0.178712	0.0795021	-0.358915	-3.96044e-05	-0.155134	-0.249489	-0.202566	0.5854	1295
2022-08-19	0.879782	2.19306	1.62387	2.39675	1.00052	1.33861	1.64179	-2.44811	-2.33512	-1.3735	-3.96044e-05	-0.97209	-1.75935	-1.47209	-0.846881	1296
2022-08-22	0.786905	0.690585	2.24734	0.880167	1.39366	-0.0344836	1.65024	0.565439	0.146085	0.346098	-0.000175913	-1.14981	-1.02295	-1.99432	-2.2895	1297
2022-08-23	-1.6747	-1.57752	-0.86593	-1.3806	-0.420898	-1.63082	-0.00814309	0.0541923	0.355594	0.0867151	-3.96044e-05	0.781289	0.266781	-0.495244	-0.313047	1298
2022-08-24	0.429968	0.693993	0.202974	0.636555	0.727458	0.660632	0.548267	-0.207919	-0.116023	-0.0869194	-3.96044e-05	-0.109429	0.0104987	0.554428	0.342764	1299
2022-08-25	-0.453353	-0.141332	0.181336	-0.00982462	-0.332017	-1.0865	-0.55925	0.15705	0.354499	0.105657	9.67044e-05	0.43974	0.948799	0.54934	1.59506	1300
2022-08-26	1.11343	0.281959	-0.842191	0.382055	-0.266268	0.883124	1.25181	-1.44964	-1.99455	-0.419091	9.66908e-05	-0.196437	-0.345475	-0.490235	1.15526	1301
2022-08-30	1.50101	2.08848	-0.42725	1.93193	2.46094	1.02379	2.02081	-0.558139	0.135946	-0.522157	-3.96044e-05	-1.36693	-1.58595	-1.34142	-0.853593	1302
2022-08-31	0.015172	-0.0764927	-1.00994	0.0662568	0.0646545	0.191562	-1.11344	0.230195	0.313238	0.0160415	-0.0001759	-0.965441	-2.35727	-0.936628	-0.574218	1303
2022-09-01	1.2252	1.53754	2.50337	1.63005	1.9786	1.94568	0.91843	0.0406817	0.291236	0.189734	9.66908e-05	-1.43604	-0.579078	-0.512713	-0.944238	1304
2022-09-02	-1.26623	0.0996316	-1.73282	-0.624997	-0.781691	-1.4937	-0.434283	-0.242687	-0.140297	-0.0962071	-3.96044e-05	1.11319	0.444431	0.140174	-0.309707	1305
2022-09-06	0.585467	3.59905	2.53405	0.512315	0.845234	2.15866	2.85995	-1.38941	-0.219871	-0.436547	-0.000312208	-0.686064	1.49005	0.860075	0.298599	1306
2022-09-07	0.779216	1.7346	-0.605806	1.17859	-0.65126	0.425892	0.607609	0.528027	0.720885	0.592077	9.67044e-05	-0.0499576	-0.722221	0.209179	-0.493286	1307
2022-09-08	-0.855768	-0.439916	-0.298809	-0.242435	-1.76744	-0.219398	-0.467249	-0.00895158	0.0220524	0.0825761	9.66908e-05	0.375552	1.39255	1.33556	1.57852	1308
2022-09-09	-1.46729	-1.99996	-1.94813	-1.70352	-2.66793	-2.43535	-1.69302	2.18979	0.806493	0.634252	0.000232945	0.205171	0.408003	0.481398	1.40581	1309
2022-09-12	-1.08019	-0.0628395	-1.78061	-1.53543	-1.87271	-0.93921	0.122951	0.996575	-0.0560938	0.0767057	-0.000175872	0.771952	1.33345	1.49942	1.74319	1310
2022-09-13	2.62848	2.28983	2.85662	2.68324	2.00331	2.80986	-0.113014	-2.371	-1.47938	-1.0712	-0.000175886	-1.42437	2.05206	-0.548114	-1.96389	1311
2022-09-14	0.583945	-1.70135	0.0938356	-0.579717	0.109609	0.24093	1.91144	0.0014242	0.629314	0.335086	9.66772e-05	-0.114009	-1.23592	0.739955	-0.50525	1312
2022-09-15	0.847967	0.758866	0.0503778	1.42475	-0.0898886	1.00349	1.66775	-0.630377	-1.81535	-0.644001	-0.000175886	-1.00548	-0.416101	0.730961	1.0067	1313
2022-09-16	1.21472	-0.675431	-0.470951	0.828177	0.906013	0.103925	-0.709828	0.063039	-0.478241	1.09922	-3.96044e-05	-1.64485	-1.13574	-1.69149	-1.70022	1314
2022-09-20	1.15588	0.70936	0.419516	0.223252	-0.399002	-0.0350467	1.94799	-1.11975	-1.37885	2.03	-3.96044e-05	-0.0859566	0.934273	2.60531	1.27196	1315
2022-09-21	1.01073	0.584484	2.49922	1.17777	0.551269	0.987468	1.55643	-0.506623	-1.01845	-0.709825	-3.96044e-05	0.444234	0.553964	-0.267914	0.298252	1316
2022-09-22	1.76892	-2.45527	0.866139	0.964634	3.39279	0.572107	1.49841	1.0236	0.992235	2.73786	-3.96044e-05	-0.0466337	0.199502	-1.06737	-0.0434073	1317
2022-09-23	1.41187	1.22987	2.71695	5.57986	0.238063	2.18003	2.51785	-0.177278	-0.0135827	0.573008	9.66772e-05	-1.91681	-1.75095	-2.53464	-1.37245	1318
2022-09-26	2.80096	1.5252	2.16342	3.58862	2.35181	1.82664	0.59264	-0.128574	0.0816704	-1.10419	-3.96044e-05	-0.0664479	-1.12705	-0.70726	-0.616941	1319
2022-09-27	-0.121653	0.290012	0.164981	-0.823054	-0.580908	0.493335	1.89961	-0.218272	-0.143814	-0.648392	-0.00044849	-0.655986	0.118147	-0.359307	0.448924	1320
2022-09-28	-1.53787	-0.706854	-1.45665	-1.29564	-3.0141	-1.61804	1.15391	0.330911	0.0821484	0.02904	-3.96044e-05	1.13265	-1.33356	-0.719591	0.0533566	1321
2022-09-29	0.885561	0.339312	-2.0701	-3.50373	0.936008	0.513688	-4.03561	0.157177	-0.0489477	1.05615	0.000233	0.121789	1.26386	1.13372	2.15404	1322
2022-09-30	0.882196	0.290012	-0.193056	-1.3728	1.04031	1.26161	-0.319413	-0.244052	-0.125219	-0.221736	9.66772e-05	1.05929	1.04086	-0.0758136	0.143118	1323
2022-10-03	-1.72443	-0.280913	-0.569708	-2.18393	1.83072	-1.54838	-0.171539	0.183457	-0.100007	-0.524987	-0.000175886	-0.272132	1.15401	1.11413	-0.228765	1324
2022-10-04	-1.71998	-0.24477	-3.6824	-2.71713	-2.63433	0.179354	-0.00814309	0.74177	0.442497	0.460224	9.66772e-05	2.94449	4.25674	3.03714	2.04977	1325
2022-10-05	1.90278	0.472426	2.43742	2.6803	0.714942	0.635276	-0.00814309	-0.250908	-0.149003	0.221531	-3.96044e-05	-0.970485	-1.37244	-0.335895	-0.667277	1326
2022-10-06	1.19102	0.228821	1.33211	2.25765	1.33764	1.3148	-0.00814309	-0.27289	-0.0302966	0.1038	-0.000175886	0.822773	0.273055	0.391314	0.424884	1327
2022-10-07	-0.684033	0.276848	0.472634	0.276813	0.343481	0.42478	-0.00814309	-0.529346	-0.298588	0.607274	9.66772e-05	-1.2087	0.216226	0.257702	-0.834563	1328
2022-10-11	0.763722	0.409118	0.629438	-0.824178	0.578853	1.55071	2.71909	-0.594421	-0.687792	-0.866363	-0.00044849	-2.09625	-3.53022	-2.34542	-1.28131	1329
2022-10-12	1.01529	1.55986	1.459	1.15468	0.876422	1.3684	0.402219	0.0610479	0.157295	0.0290516	9.67044e-05	0.33631	-0.641122	-0.347009	-1.1867	1330
2022-10-13	-0.90164	0.308686	-1.95672	-3.92307	0.170302	-0.308687	-0.109424	0.209324	-0.12663	-0.277961	-3.96044e-05	-1.53664	-0.0493266	-1.18177	-1.28145	1331
2022-10-14	2.17938	1.53087	0.919552	2.1487	1.33926	1.62763	0.978143	-0.278623	0.0891463	0.228853	-3.96044e-05	0.0262899	-1.25359	2.59398	0.509569	1332
2022-10-17	-2.54188	0.269677	-2.30071	-3.4338	-2.02379	-2.24331	0.249367	0.370362	0.405741	-0.265631	9.66908e-05	0.964666	-0.539159	0.594471	-1.10296	1333
2022-10-18	1.13492	0.587252	0.0289661	1.88139	0.213476	0.678914	0.26936	-0.301937	-0.29044	-0.421686	-3.96044e-05	-0.826375	0.286661	0.0610252	-0.106788	1334
2022-10-19	-0.121265	0.608575	1.37977	1.18797	1.66107	0.23558	1.3963	-0.286558	-0.361865	-0.468441	-0.0001759	-1.46893	-0.819171	-1.82038	-1.15676	1335
2022-10-20	-1.15787	0.0327834	-0.946182	-0.878618	-0.744295	-1.61336	-0.767577	-0.144675	-0.0647493	-0.146397	-3.96044e-05	0.187415	1.05425	-0.0735233	1.0035	1336
2022-10-21	-0.719041	-4.14171	-0.699668	-0.0577314	-0.448058	-0.794273	1.34867	0.0890048	0.18642	0.397428	0.000232972	0.476242	-1.24844	0.809059	-0.434974	1337
2022-10-24	0.526291	2.84293	-0.411543	-0.0419757	0.575113	1.40913	1.14367	0.144793	0.526635	-0.261029	-0.00044849	0.338076	2.50151	1.6571	0.0765871	1338
2022-10-25	-1.50738	-1.10357	-1.85525	-2.71163	-0.960486	-2.08998	0.286735	0.797263	1.35148	0.186124	0.000369281	0.613347	-1.02374	-1.26448	-2.36998	1339
2022-10-26	-1.12036	-1.63695	-2.35791	-2.24282	-2.04194	-2.51724	-4.92731	0.697305	1.14808	0.213353	9.66635e-05	0.43915	2.08814	1.58108	1.59273	1340
2022-10-27	-0.330392	-0.602263	1.80528	0.633669	0.753839	0.514741	2.6609	-0.566427	-0.598299	-0.240124	-0.000175872	-0.512587	-0.66437	1.09396	-0.446839	1341
2022-10-28	1.54564	1.95962	1.11935	0.0205884	1.50058	1.94258	1.29652	0.277582	0.407194	0.338304	-3.96044e-05	-0.825401	-0.448565	-0.133543	-0.773251	1342
2022-10-31	0.288639	1.1004	1.08112	0.89813	0.831451	0.0366917	2.7314	-0.156464	0.164637	-0.315544	-0.000312181	-0.654262	-0.198026	-0.976157	-1.51833	1343
2022-11-01	-0.00267079	-0.641417	0.314794	0.85611	-0.213357	0.0367069	-1.59246	-0.0641964	0.0389879	-0.0491327	-3.96044e-05	0.362313	2.41533	0.965662	1.74333	1344
2022-11-02	-0.191124	-1.21574	-0.0811222	-0.103287	-0.12829	-0.497056	0.789863	-0.410411	-0.688329	-0.426498	9.66908e-05	0.231769	-0.651078	0.506321	-1.35439	1345
2022-11-03	1.72199	1.24704	2.57395	4.46212	3.04907	2.87282	0.539471	0.00698036	0.0995274	0.117453	-0.0001759	-1.4384	-2.55751	-2.67359	-1.60664	1346
2022-11-04	-3.44755	-1.16745	-2.99971	-1.51386	-3.15652	-3.45267	-0.0280419	0.96009	1.17001	1.38586	0.000232972	2.9643	3.04991	1.95858	2.29724	1347
2022-11-07	-0.538522	-0.719175	-2.22106	-2.87056	-1.58574	-0.686177	-3.65805	-0.643676	-0.840852	-1.1488	-0.000175886	0.243071	1.96177	1.52153	-0.663049	1348
2022-11-08	-1.87917	-1.54154	-1.98322	-2.02954	-1.35974	-1.96993	1.09069	-2.39599	-2.72092	-1.83159	9.66772e-05	-0.0726705	0.20099	0.557583	0.236751	1349
2022-11-09	1.11115	0.901971	1.1295	3.08179	-0.108953	2.30704	-0.429219	-3.4687	-3.26786	-2.70012	-0.00153945	2.30135	1.52766	0.798671	0.387887	1350
2022-11-10	-1.58798	-5.35773	-2.98105	-4.32371	-3.56066	-3.39494	-2.83292	2.21263	2.74299	2.26761	-0.00126798	1.80832	-0.63884	1.51159	0.10307	1351
2022-11-14	-1.17679	-1.70626	-3.40336	-0.769266	-5.44437	-2.46688	-5.76556	-1.31872	-0.778046	-0.644219	0.00118877	1.44745	1.00001	-0.305614	2.33474	1352
2022-11-15	-0.266344	-1.36925	-0.727435	-2.43279	0.404733	-1.94832	-1.39743	0.323111	0.112377	0.397549	-0.000176036	0.0979262	1.21681	1.06922	1.60211	1353
2022-11-16	1.10276	0.263794	-0.474317	0.0201803	0.0435002	1.04556	2.68326	-0.5219	-0.677261	-0.569459	0.000233245	0.0484731	0.00645816	-0.839303	-0.282391	1354
2022-11-17	-0.00267079	1.05294	1.13838	1.15997	2.15278	1.5413	2.98334	0.151336	-0.0465359	0.282551	-3.96044e-05	-0.94338	-2.34214	-1.77008	-1.76903	1355
2022-11-18	0.626664	-0.551861	-0.161107	-1.34372	-0.381345	-0.360957	-1.83476	-0.120882	-0.00304451	-0.0536173	-0.000448899	-0.488544	0.0345976	-0.128863	-0.33828	1356
2022-11-21	1.80594	2.36605	2.34959	1.76088	1.44788	2.11802	2.2699	-1.23319	-1.47944	-0.637667	-0.000176063	-0.753404	-1.26451	-0.0671495	-1.6891	1357
2022-11-22	-1.42752	-0.844389	-0.797956	-1.42162	-1.20474	-1.06878	-1.28778	0.556748	0.448705	0.374204	-3.96044e-05	0.106662	1.69708	0.73346	-0.201804	1358
2022-11-23	0.258623	-1.93818	-1.8456	-2.37229	-2.20323	-1.6881	0.967228	0.506268	0.631	0.184699	0.0002333	-0.22867	-0.0329819	-0.930039	0.0162977	1359
2022-11-25	-0.8049	-0.718405	-0.788189	-0.907572	0.629845	-1.00439	0.306262	-0.200064	0.140579	0.844464	0.000369649	0.678339	0.168076	-0.1919	-1.51862	1360
2022-11-28	1.09534	-0.70848	0.341311	0.903278	0.111005	1.28195	2.17502	-0.458773	-0.463326	-0.643822	0.000233163	-0.38392	0.35387	1.28948	0.957695	1361
2022-11-29	3.50065	-0.520514	0.635317	0.670646	0.986688	0.0577385	-2.5666	0.261138	0.653594	0.267122	0.000233109	0.330546	-0.312762	-0.433779	-0.540393	1362
2022-11-30	-1.68737	1.27759	0.700265	0.509647	-0.427692	-0.614196	-3.52113	0.907176	1.00684	0.293648	0.000778208	-0.00334887	0.499183	1.92964	1.68628	1363
2022-12-01	-1.92564	-4.83154	-3.64508	-4.25184	-2.44088	-2.01051	-2.34681	-0.300278	-0.272176	-0.39491	-0.000312154	2.99479	1.48319	0.939657	-0.0917465	1364
2022-12-02	0.362351	-0.883131	-0.468548	-0.574027	-0.160864	0.0566127	-1.21678	0.108415	0.223189	-0.0412963	-0.0001759	-1.17282	1.18006	-2.03096	-0.657827	1365
2022-12-05	2.12394	2.12244	0.565127	1.79252	1.19995	2.01077	-3.02136	-0.216237	-0.506712	-0.262287	-0.000175913	-0.540502	0.932246	0.417346	0.668284	1366
2022-12-06	1.38728	0.128441	-0.0552029	-0.476049	-0.318481	0.335534	1.68338	0.110028	0.122172	0.0428999	9.67044e-05	-0.237632	-1.13577	-0.975514	-0.723248	1367
2022-12-07	-0.208068	-0.154404	-0.158611	0.121788	-0.0923167	-0.567367	-1.22003	-0.383366	-0.571537	-0.309847	9.66908e-05	0.462565	-0.413535	0.299622	-0.669068	1368
2022-12-08	-1.13559	-0.18024	-0.962908	-0.591304	-0.955607	-1.09399	-0.284374	0.459498	0.624602	0.34809	9.66772e-05	0.432702	0.765693	0.0555437	0.371752	1369
2022-12-09	0.512976	-0.0902155	0.048074	-1.09527	-0.845797	-0.92692	-0.477697	-0.17975	-0.26249	-0.213515	-0.000175886	0.312101	1.01504	-0.187804	1.38459	1370
2022-12-12	0.854219	1.3466	0.109878	0.380956	0.842158	1.54691	1.10736	0.059379	0.127816	-0.082674	9.66772e-05	-0.635119	0.668039	0.29871	-0.607963	1371
2022-12-13	-2.13355	-3.0283	-1.73724	-1.29198	-1.99208	-2.9332	-1.79773	0.671844	0.557875	0.24483	-0.000584812	2.18147	-0.00735533	1.84622	1.2116	1372
2022-12-14	0.635195	-0.272958	-0.503432	-0.468048	-0.669684	0.169103	0.347346	-0.0280595	-0.204436	-0.371469	0.000369322	-0.984997	0.502743	-0.715295	-0.705819	1373
2022-12-15	1.4048	3.79774	0.353785	2.92224	1.17076	3.67594	1.12917	-0.607283	-0.566505	-0.281054	9.66772e-05	-1.54248	-1.10594	-0.663465	-0.522443	1374
2022-12-16	0.697896	-1.77925	0.579454	0.559368	0.844982	0.19688	-0.0498166	-1.00097	-1.40587	-1.00251	-3.96044e-05	0.496297	-0.851258	-1.03667	-3.74698	1375
2022-12-19	-0.891553	0.385281	-0.279575	-0.169944	-0.459354	-0.475407	0.325111	-0.303488	-0.0169827	-0.500739	-0.000312181	-0.159786	0.996693	-0.311956	-0.100625	1376
2022-12-20	-0.345451	-7.61765	-0.217924	0.502016	-0.988923	1.05631	-0.904457	0.565154	0.661541	0.344029	0.000232972	1.34594	1.19578	-0.0667749	-1.2374	1377
2022-12-21	0.0659256	1.68096	0.743528	1.09129	0.434653	-0.732553	1.0859	-0.143892	-0.0789611	-0.145003	-0.000175886	0.166276	0.340055	0.362988	0.60291	1378
2022-12-22	0.528269	-0.052385	0.232476	0.595067	0.777328	0.569048	0.090679	-0.0651064	0.0185037	0.12053	-0.0001759	-1.0699	-0.391199	-0.80592	-0.199284	1379
2022-12-28	-1.11732	2.51713	-0.689604	-0.0243053	-0.781364	-1.88625	-0.294281	-0.415987	-0.416882	0.220415	-0.000312236	0.107367	0.268374	2.00707	2.42146	1380
2022-12-29	-0.725747	-1.48388	-0.931886	-0.378318	-0.945832	-0.631676	-0.784451	0.0705621	0.11947	-0.557801	-0.000175941	0.574572	-0.0195589	0.828807	-0.465734	1381
2023-01-03	2.02317	-3.12635	2.23801	1.33645	3.11296	1.11477	-2.57287	0.000150268	0.157745	0.0326127	9.67317e-05	1.70804	1.02394	2.94016	0.454626	1382
2023-01-04	-2.96148	1.5379	-1.24454	-1.37019	-2.19617	-2.98322	-1.37641	0.18564	0.541598	0.128971	-0.000175941	0.77576	-0.0313104	-0.118114	-1.37819	1383
2023-01-05	1.49862	2.05088	2.02092	2.39312	2.14709	2.63673	-0.403795	-0.0797472	-0.112561	-0.408437	-3.96044e-05	-1.43128	-2.12643	-1.03055	1.09159	1384
2023-01-06	-2.19746	-1.82336	-1.98667	-2.39738	-1.60032	-2.75101	-2.28491	0.109096	0.20915	0.221436	9.67317e-05	1.02479	0.0900859	0.623373	0.0174739	1385
2023-01-09	-1.39588	-0.864793	-2.83854	-2.07438	-2.5851	-1.90093	-3.58435	0.248294	0.632165	0.148472	0.000233027	1.5063	0.933949	1.06552	0.20112	1386
2023-01-10	1.0604	0.866238	0.451572	0.749338	1.06258	1.44787	0.367143	0.282361	0.151743	0.0405118	9.66908e-05	-0.0647841	-0.8272	-0.45381	0.200085	1387
2023-01-11	-0.194015	0.41188	-0.0537977	0.444402	1.72285	-0.372477	-0.383429	0.582127	0.640233	0.783947	-0.000312208	-0.419851	0.83594	0.888603	-0.8809	1388
2023-01-12	-0.734704	-3.81557	-1.66555	-0.828262	-0.231181	-1.06632	-1.80954	1.04845	0.280667	0.0407222	0.000233	0.539906	-0.427636	-1.01176	0.296011	1389
2023-01-13	0.572691	-2.61685	0.247899	-0.169743	-0.0708107	-0.101289	-1.92689	1.18346	0.373845	0.362983	-3.96044e-05	1.36406	-0.0798169	-1.43131	-0.893349	1390
2023-01-17	-0.578033	0.426925	0.368903	-1.01204	-1.56811	-0.81426	3.83536	1.2604	1.23278	0.00271516	9.66772e-05	0.32681	0.996278	-0.236544	-0.26617	1391
2023-01-18	0.972864	0.343737	-0.676395	-1.50984	-1.71984	-0.0563344	-1.02301	-0.546482	-0.614253	-0.314247	-0.00044849	0.339701	0.181457	0.857627	1.16596	1392
2023-01-19	1.00343	0.0151733	0.34827	0.0483419	0.533053	2.24918	1.08715	0.386991	0.408346	0.460562	9.67044e-05	-0.172581	-1.79379	-2.51222	-2.26079	1393
2023-01-20	-1.35671	1.99935	-0.414728	-0.109701	1.38828	-1.49312	0.457964	1.57219	1.0985	0.639244	9.66908e-05	0.304699	1.00615	-0.0647931	1.14941	1394
2023-01-23	-0.560452	0.94447	-0.674002	0.0626907	0.25183	-1.58972	0.387845	0.182101	-0.373916	0.315927	-3.96044e-05	-0.624598	-0.487894	0.764345	-0.554922	1395
2023-01-24	-0.26459	-0.86107	-0.153007	0.681757	-0.00213108	-0.409361	-0.00814309	-0.326584	-0.774058	-0.541017	9.66772e-05	0.282668	0.0647845	0.638448	-0.101851	1396
2023-01-25	0.764794	-0.607455	-0.551835	-0.728749	-0.695687	-0.913475	-0.00814309	0.360997	0.549813	0.26462	-3.96044e-05	0.51652	-0.697821	-0.531401	0.66383	1397
2023-01-26	-1.13732	1.00082	0.70553	0.0626907	0.275511	-0.252883	-0.00814309	-0.0880449	-0.122987	-0.271329	-0.000312181	0.0400833	0.658703	-0.417639	-0.844003	1398
2023-01-27	-0.59838	-0.646527	0.186907	-0.124021	0.205893	-0.18692	-0.00814309	0.00622579	-0.0846186	0.0806896	0.000232972	-0.585456	0.0165502	-1.31979	-1.35871	1399
2023-01-30	0.628033	0.514006	-0.193111	0.0913917	0.321143	0.557726	-2.14302	-0.285098	-0.362219	-0.661396	-0.000175886	0.00642378	-0.236557	0.175684	-0.306807	1400
2023-01-31	-0.300291	-0.255076	0.18689	0.710431	-1.02001	0.559823	0.201609	0.233087	0.16683	0.374096	-3.96044e-05	-0.0645108	-1.58691	-0.549662	-0.309033	1401
2023-02-01	0.0323631	-1.24444	-1.17038	0.236109	-0.885346	-0.385922	-0.729337	0.519648	0.557467	0.218381	-3.96044e-05	0.0602578	1.20859	0.237314	1.68524	1402
2023-02-02	-0.318165	-1.14353	-0.013005	0.699666	-0.608753	-0.385024	-0.763162	-0.331324	-0.0367559	-0.147715	-3.96044e-05	-0.294324	2.22019	1.43021	-0.151974	1403
2023-02-03	1.3614	3.52064	1.86533	2.73681	3.03588	3.0434	2.50429	-0.0468916	0.19111	0.0332657	-3.96044e-05	-2.71551	-2.27146	-1.62254	-1.37263	1404
2023-02-06	0.815441	2.22436	2.08389	0.949831	0.664769	1.71937	0.982361	-0.694715	-0.544839	-0.676677	-0.0001759	-0.175471	-2.78334	-1.54196	-1.36742	1405
2023-02-07	-0.0374257	-1.87449	0.351616	-0.0539518	-0.87634	-1.27288	-0.0509198	0.423126	0.555764	0.362652	9.66908e-05	-0.201864	-0.467763	-0.630937	1.63339	1406
2023-02-08	-0.176523	-0.159593	-0.580832	-1.17434	-0.926448	-0.370292	-0.115107	-0.326534	-0.238675	-0.227241	-0.0001759	0.060567	0.606946	0.930897	0.592572	1407
2023-02-09	-0.0374568	-0.414294	-0.538873	-0.932821	-0.118051	-0.525653	-0.586293	-1.21503	-1.1409	-0.570501	-3.96044e-05	0.32218	0.0185761	-0.81574	-0.328458	1408
2023-02-10	-1.13605	0.670079	1.85184	1.41418	1.26867	0.994927	1.72355	-0.211572	-0.378231	-0.01431	9.66908e-05	-1.18602	-0.916081	-0.382984	-2.41915	1409
2023-02-13	-0.265002	1.58292	-0.968214	-1.09646	-0.879452	-1.01869	0.482072	0.0906454	-0.121349	-0.441446	0.00050544	-0.267625	-0.356171	-1.41064	0.0473038	1410
2023-02-14	0.329565	0.423566	-0.0741679	-0.302021	0.413895	0.0327296	0.295245	0.380392	0.510532	0.384992	-0.000312099	0.395841	-0.738231	0.509559	0.649493	1411
2023-02-15	0.59068	1.51193	0.79854	1.85677	0.344008	1.53502	1.34603	1.98618	1.21233	0.616583	-0.000312154	-1.97357	-0.654242	-1.6945	-3.58862	1412
2023-02-16	0.867175	-0.37952	-0.0134408	0.197367	0.182293	0.0782704	0.415656	-0.782644	-0.384215	-0.600211	-3.96044e-05	-0.187374	0.232514	-0.934601	0.557837	1413
2023-02-17	0.621618	0.314747	0.128931	0.0939804	0.504256	0.530119	0.367565	0.905351	0.50299	0.336765	9.66772e-05	0.244858	-0.953805	0.0616062	0.356549	1414
2023-02-21	0.481736	0.835777	0.434563	-1.45346	0.0439335	-0.011879	0.198066	-0.161688	-0.378109	-0.129554	-3.96044e-05	0.119317	1.46798	1.38202	1.19686	1415
2023-02-22	0.428988	-0.15612	0.7011	0.696253	0.709418	1.03227	1.08967	-0.291756	-0.195345	0.0798276	-0.000312181	-0.118555	0.202879	1.41502	-0.330011	1416
2023-02-23	0.462627	0.0132501	0.826458	0.71374	1.0723	0.718647	0.870876	-0.281585	0.0397743	-0.258903	9.66908e-05	-0.6315	-0.914558	0.0585309	-1.41383	1417
2023-02-24	0.873703	1.99511	0.788354	1.01381	1.31655	1.1826	2.45438	-0.753088	-0.46765	-0.371389	-3.96044e-05	-0.959602	-1.17194	-1.88245	-1.96167	1418
2023-02-27	-0.758563	-0.257847	-1.04126	-1.2989	-0.546333	0.103461	-0.504543	0.237905	0.230035	-0.0247161	-0.0001759	0.410001	-1.00256	1.4241	2.03475	1419
2023-02-28	0.718916	-0.14196	-0.116087	-0.834411	0.0436662	-0.334615	-0.662336	-0.397075	-0.332618	-0.109215	9.66908e-05	0.303395	-0.586979	0.0589335	-1.48985	1420
2023-03-01	-0.328827	-0.374655	-1.46347	0.87441	0.270708	-0.563584	-3.52956	0.436168	0.596477	0.234065	-3.96044e-05	0.938456	1.2731	0.569364	0.0815521	1421
2023-03-02	0.323485	1.28827	1.62074	1.3691	0.76848	1.0935	2.44835	-0.217191	-0.222032	-0.258769	-0.0001759	-0.352974	-0.552326	-0.4517	0.139214	1422
2023-03-03	-0.122781	-0.991147	-0.423275	-0.796566	-0.862786	-0.910597	-0.397121	-1.12867	-0.850873	-0.0176606	9.66908e-05	0.240719	0.770972	1.57444	0.852498	1423
2023-03-06	-0.0541653	-0.232463	-1.58346	-0.763465	-1.64314	0.4714	1.28858	0.00492071	-0.0653858	-0.305722	-0.000312208	0.414227	-0.0330964	-0.82158	-0.892519	1424
2023-03-07	2.21841	1.22308	2.47899	2.84519	2.41041	3.20192	1.6128	-0.261831	-0.0762833	0.347485	-3.96044e-05	-1.38964	-0.495406	-0.51309	-0.00555417	1425
2023-03-08	0.812111	0.333024	0.500587	0.305253	-0.386778	-0.058934	-0.577263	-0.543502	-0.344034	0.26556	-3.96044e-05	-0.667471	-2.26103	-0.839616	-0.383284	1426
2023-03-09	-0.121316	-1.0145	-0.568973	-1.26637	-0.705829	-0.22345	0.691383	-1.47651	-1.09946	-0.647491	0.000233	0.850616	0.0230224	0.573605	-1.37074	1427
2023-03-10	0.45463	-1.78575	-1.67084	-1.78938	-3.41926	0.0116147	-3.1772	-0.275388	-0.170222	-0.0640902	0.00431466	1.71173	-0.104753	-0.00524772	0.830822	1428
2023-03-13	-1.99081	-2.54083	-1.49612	-1.71299	-2.18695	-1.78735	-3.01938	3.93539	2.64476	0.0541138	0.00104679	2.84349	2.76744	2.19504	1.24661	1429
2023-03-14	-0.190463	1.55024	0.229658	0.209959	0.464359	0.546605	1.18349	0.482873	0.227686	-0.0175245	-0.00166952	-0.267552	1.43677	-0.190765	1.76271	1430
2023-03-15	2.08864	-2.02461	3.82926	1.68113	2.47793	1.18161	1.70623	-0.428861	-0.53809	-0.522289	0.000911419	0.850127	1.16846	-1.25666	-1.63066	1431
2023-03-16	-0.64677	0.238456	-1.77979	-1.15781	1.30762	-0.972072	-0.218706	0.600567	0.211278	0.184726	-0.00221435	-0.0900602	-0.239626	-0.0684973	-0.00555417	1432
2023-03-17	-0.138497	-1.35133	-0.503816	-0.434443	-0.322938	-0.733958	-0.508721	1.97739	1.08571	0.510689	-0.000311691	2.15834	-0.344736	0.936678	-1.40087	1433
2023-03-20	-1.14333	-0.585545	-1.51807	-1.68469	-0.369461	-0.661206	-0.535813	0.214894	-0.575965	-0.264655	-0.000311746	0.34945	1.55006	0.367488	0.259704	1434
2023-03-21	0.781067	0.87945	-0.943323	0.906465	-0.646699	1.35953	0.308551	0.263071	0.642506	2.98791	-0.000175695	-0.991187	-0.0957526	-0.12924	0.228801	1435
2023-03-22	-0.172825	0.50451	-0.456596	-0.533149	-0.00211359	-0.803659	-0.155899	-0.734736	-0.687078	-1.43985	-3.96044e-05	-0.229419	-0.325355	0.118745	0.632111	1436
2023-03-23	-1.0946	-2.26417	-1.95697	-1.29758	-2.11129	-0.77653	-3.26343	0.78913	0.719178	0.67539	-0.000720264	1.53678	1.38122	0.241983	0.19528	1437
2023-03-24	1.78611	-0.495774	2.5755	1.40977	0.857842	1.75482	2.57621	-0.726831	-0.642532	-0.590606	-3.96044e-05	0.818105	0.64967	-0.81244	-0.49501	1438
2023-03-27	-1.3131	1.11324	-0.537455	-0.763572	-0.397091	0.0115015	0.831652	-0.321051	-0.367669	1.55066	-0.00112937	-2.68811	-0.713725	-0.00524772	-0.354598	1439
2023-03-28	-1.21754	-0.721818	-1.09776	-0.904324	0.833044	-1.57064	-0.583642	0.0579289	0.524524	0.910844	-0.000175886	0.873957	0.365754	-0.633515	0.285522	1440
2023-03-29	-0.689896	2.26578	0.3678	0.408906	-0.0485412	0.66089	0.715044	0.819877	0.161225	0.683379	-0.000312208	0.0663416	0.498364	-0.258378	0.427228	1441
2023-03-30	-0.674668	0.000628448	-1.45308	-0.786829	-1.25702	-0.499347	-0.863454	-0.303395	-0.0297852	-0.287825	9.67044e-05	-0.00872976	1.08675	0.938622	1.7914	1442
2023-03-31	-0.192559	0.0270882	0.545742	-0.00913556	-0.23557	-0.0813926	-0.135027	0.299263	0.227094	0.115796	9.66908e-05	0.715997	0.400299	0.244004	-0.143144	1443
2023-04-03	-1.56212	-0.555877	-0.372435	-0.482606	0.0442784	-1.85419	0.520249	-0.580985	-0.132889	-1.11629	-0.0001759	0.145163	0.0759767	0.551872	-0.226662	1444
2023-04-04	0.327415	-1.02399	-1.18666	-1.35079	-1.36006	0.952608	0.0129766	0.237543	0.511267	0.158096	9.66908e-05	1.38489	0.194814	1.27525	-0.00555417	1445
2023-04-05	-0.0200321	-0.681041	0.662535	0.418081	-0.472766	0.310952	-0.00286336	-0.0431255	0.308122	0.0482049	-0.000312208	1.09508	1.67859	0.295711	-0.423367	1446
2023-04-06	0.326974	0.722756	-0.172114	0.190615	-0.214558	1.23965	-0.17185	-0.158524	-0.357285	-0.102016	0.000233	-1.62048	0.428694	-1.03462	-0.626138	1447
2023-04-11	0.135988	2.56941	0.424808	0.677077	0.020946	0.570967	0.604061	1.60925	0.123217	0.339258	0.000232945	-0.00954862	0.25455	0.116761	-0.37672	1448
2023-04-12	-0.523066	-0.526017	-1.60065	-0.880496	-1.68241	-0.920166	-0.726004	-0.289447	0.202503	-0.345597	-3.96044e-05	0.246217	0.185163	1.14182	0.564089	1449
2023-04-13	-1.85074	-1.18964	-1.31387	-0.847741	-2.22358	-2.11078	-0.288283	0.319299	0.782369	0.172961	0.000641531	2.11312	1.04892	0.944253	0.834365	1450
2023-04-14	0.60916	1.78265	1.46611	1.6294	1.95646	1.76226	0.0605904	0.0118677	0.683535	0.236218	-0.000312018	-1.61232	0.875929	0.405557	0.0498344	1451
2023-04-17	0.415946	0.982492	1.29678	0.837296	0.946627	0.220023	0.499025	-0.820526	-0.235415	-0.331626	-0.000312072	-1.35009	-1.42992	0.692615	0.978875	1452
2023-04-18	-0.211885	-0.548931	-0.847271	-0.855453	-0.310887	-0.637222	-0.171839	0.65393	0.196656	0.504507	-0.000175859	0.15724	-0.698186	1.0268	2.81361	1453
2023-04-19	1.09362	0.862482	0.106043	-0.323594	0.115808	0.0343565	0.498545	-1.22877	-1.42233	-1.08616	0.000232891	-0.537424	-0.798549	0.108354	-0.487698	1454
2023-04-20	0.0841165	-0.927265	-0.330029	-0.0804481	-0.929583	-0.865015	-0.673317	-0.497047	0.0255525	-0.465538	-0.000448367	0.853409	1.46054	1.06355	0.223536	1455
2023-04-21	1.29528	0.209757	-0.0525088	0.419741	-0.40818	1.44357	1.02078	-0.832021	-0.854029	-0.775869	-3.96044e-05	-1.89049	-0.572947	1.86181	0.2475	1456
2023-04-24	0.1526	0.144116	-1.05959	-0.53772	-0.911803	0.220405	0.192025	0.148177	-0.104771	0.30766	-3.96044e-05	0.198207	-0.30398	-2.03983	-2.15471	1457
2023-04-25	1.44157	-0.614865	1.17239	0.848952	0.929829	1.22506	1.89321	0.57877	0.184805	0.228843	-0.000175886	0.45334	-0.328333	-0.623444	-1.38416	1458
2023-04-26	-0.448744	-0.340798	-1.65057	-1.25173	-0.552634	0.269556	-0.317355	0.0483065	-0.0318773	-0.25361	0.000232945	0.800355	-0.122856	0.724678	0.404745	1459
2023-04-27	0.168997	0.393971	0.695969	0.218861	1.3569	0.0350764	-0.223174	0.757137	0.3469	0.112017	-0.000312154	-1.00285	0.654231	-0.453398	-0.360909	1460
2023-04-28	-1.01734	2.51094	-0.446173	-1.56956	-1.07583	-0.0823067	-0.585685	-0.166845	-0.18863	0.336831	0.00050544	-0.223721	-0.888977	-0.62688	0.0218903	1461
2023-05-02	1.2864	0.580145	0.854702	1.52304	0.498501	-1.25087	0.275492	-0.550795	-0.223491	-0.453208	-3.96044e-05	0.652094	-0.00803283	-1.44206	-1.2308	1462
2023-05-03	-0.294237	-1.5123	-1.01794	-1.01752	-1.41494	-0.128256	-0.00814309	0.222918	0.278024	-0.0625907	-0.000312099	0.975932	1.07625	0.631122	-0.346155	1463
2023-05-04	-0.690149	-2.04944	0.794802	-0.461568	-0.219312	-0.0351439	-0.375861	-0.189777	-0.278095	-0.0972221	9.66499e-05	1.58201	0.822144	-0.409442	-0.435317	1464
2023-05-05	-2.61629	1.39963	-0.328316	-0.980911	1.26734	-1.65484	0.0286455	0.461076	0.974389	0.146438	0.000777636	-2.41423	0.457479	-0.528892	0.821303	1465
2023-05-09	-0.35105	0.364467	1.45	0.455363	0.0926314	-0.126928	0.517001	-1.51228	-1.31448	-1.16189	-0.000856844	1.53102	-0.630438	2.34466	3.11868	1466
2023-05-10	-0.438876	-0.8465	-0.2508	0.0615794	-0.098543	-0.28765	0.621029	-0.0757449	-0.0840387	0.0150741	0.000369077	0.319894	-0.120146	2.09474	1.28203	1467
2023-05-11	1.96253	-0.104201	0.999701	1.60445	1.02258	1.60373	0.823835	-0.555205	-0.458802	-0.331182	-0.000312045	-1.19513	-1.45818	-0.222926	-0.336463	1468
2023-05-12	0.913395	1.49587	1.20428	0.532013	0.448779	1.03567	0.488043	-0.20268	0.0844666	0.280902	9.66227e-05	0.160517	-2.43302	-2.11288	-1.59491	1469
2023-05-15	-1.00534	0.543031	-0.353016	-0.876597	-0.502078	-1.15221	-0.295326	0.26657	0.0578491	-0.124254	-0.000584594	-0.0531633	0.0641486	-1.14448	-0.325587	1470
2023-05-16	-0.453546	0.682668	0.16678	0.459825	0.401454	0.801785	1.1965	-0.172175	0.0304633	0.436111	-0.000175886	-0.728085	-0.27105	0.510042	-0.355093	1471
2023-05-17	0.465528	1.11464	0.727842	0.275698	0.661516	0.268076	1.18733	0.250116	-0.0534604	0.135871	-3.96044e-05	-1.86533	-0.260109	0.279155	-0.851276	1472
2023-05-18	0.326241	1.23414	1.09282	0.73326	1.29634	0.760609	1.92744	-0.521862	-0.224658	0.314255	9.66772e-05	-0.835532	-0.418696	-0.46093	-0.728549	1473
2023-05-19	0.1011	-1.08158	-0.858267	-0.566021	-1.32552	-1.0177	-1.53401	-0.00485808	0.0723199	0.192444	-3.96044e-05	0.0192051	0.319282	0.223019	1.48208	1474
2023-05-22	-0.00267079	1.22001	0.268091	0.562183	0.0683349	0.384992	1.49708	-0.0797691	0.0121962	-0.194106	-3.96044e-05	0.429917	0.437103	0.165394	-0.141056	1475
2023-05-23	-0.400709	0.0881304	0.711682	0.0338416	0.565162	0.503229	0.708649	0.256779	0.304018	0.0692631	-0.000312181	-0.114125	-1.69571	-0.461356	-1.47005	1476
2023-05-24	1.79178	0.479813	0.269256	0.793781	1.0582	1.89952	0.480938	-0.79131	-0.529688	-0.375551	-3.96044e-05	-0.0282205	0.605636	-1.3944	-1.00212	1477
2023-05-25	0.803781	0.817884	0.674316	0.62418	0.067974	0.821368	0.968047	0.0738148	0.0209535	-0.0106435	-3.96044e-05	-1.24569	-1.02815	-1.12787	-0.32382	1478
2023-05-26	-0.191165	0.876353	0.250102	-0.239725	0.020946	-0.131188	-0.752893	0.146742	0.171176	0.398293	0.000505495	-0.0727759	0.326844	0.113901	0.799778	1479
2023-05-30	-0.551886	-0.902916	-0.175538	-0.870964	-0.261378	-0.0595771	0.823823	0.756142	0.621654	1.37031	-0.000312127	0.201526	0.251148	0.113669	-0.723841	1480
2023-05-31	-0.0886024	-0.0886592	1.38907	0.105561	1.91941	0.944877	1.56838	-0.440684	-0.272193	-0.123018	-3.96044e-05	0.612929	-0.0195589	-1.44778	-0.795679	1481
2023-06-01	-2.54329	-1.33753	-1.98229	-1.99065	-1.19587	-2.48729	-0.856978	-0.377085	-0.139191	-0.295721	-0.000312181	0.498365	0.554505	0.0555437	-0.540877	1482
2023-06-02	-0.054809	1.26072	0.573376	0.97186	-0.0259939	-0.930079	-0.556337	0.299821	0.370361	0.440845	0.000505495	-0.668616	0.93254	0.176764	1.37782	1483
2023-06-05	-0.33315	-0.176715	0.067676	0.404789	-0.378461	-0.246443	1.13342	-1.30701	-0.8974	-0.431876	-0.000312127	-0.253517	-1.00813	0.597566	-0.266874	1484
2023-06-06	-0.281332	0.0118868	0.534386	0.319801	0.443824	-1.13288	0.706705	1.19456	0.629136	0.506457	-0.000175886	-0.186937	0.392415	0.651039	-0.0930315	1485
2023-06-07	-0.700783	0.36356	-0.135249	-0.466411	0.325837	0.290928	0.48632	-0.787165	-0.502416	-0.322329	-3.96044e-05	0.508698	-0.164622	0.408743	0.111041	1486
2023-06-08	0.294282	-1.47476	-1.57073	-1.35975	-2.00418	-1.08071	-0.916026	0.0831466	0.0909826	0.112029	0.000641667	-0.105889	0.185839	-0.895836	-0.888194	1487
2023-06-09	-0.666969	0.630802	0.632526	-0.447441	0.564438	-0.774142	0.828415	-0.068604	-0.0806937	0.327189	-0.000584594	-0.392323	1.51543	-1.15232	-1.7367	1488
2023-06-12	0.609252	0.439895	0.0473192	1.28133	1.73681	-0.173091	0.826492	-0.536264	-0.947942	-0.353238	-0.000312181	-0.466023	-0.266645	-0.494753	0.180146	1489
2023-06-13	-1.38615	0.325788	-0.900861	-1.72239	-1.05867	-0.677981	0.743421	-0.0309214	-0.0616505	-0.178396	-0.000175913	0.0306507	-0.0667444	-0.0667129	1.27136	1490
2023-06-14	-0.266285	-0.868423	-1.33766	-1.18859	-1.89353	-1.29012	-0.541187	-0.746967	-0.909199	-1.06599	-0.000175927	0.0250051	-0.887616	-0.872327	0.67724	1491
2023-06-15	-0.812947	1.4304	-1.46853	-0.916233	-1.05013	-0.895906	-0.923757	0.354548	0.128852	-0.022693	-0.000721421	-0.245894	-1.03503	0.0570969	-0.808263	1492
2023-06-16	-0.762653	1.62909	0.165917	-0.731289	0.402391	0.123798	-0.262891	0.591895	0.471858	-0.153304	0.000233163	0.359812	1.38996	0.491229	0.885383	1493
2023-06-20	0.916065	-0.472259	0.504593	1.16001	1.20858	2.15229	2.83993	1.55035	0.671075	0.435537	0.00105092	-1.69756	-0.545559	-1.44365	-0.00555417	1494
2023-06-21	-1.1871	0.754641	-1.00721	-0.0645448	-1.00002	-0.264016	-0.170001	1.2383	0.862001	0.167197	-0.000584758	-0.32493	-1.71381	-0.961946	-1.65399	1495
2023-06-22	-0.268666	0.960276	-0.0327785	-0.176061	0.425168	0.630731	-0.0182616	-0.129308	-0.189125	-0.188639	0.000233	-0.371081	-1.15661	-0.716487	-0.746141	1496
2023-06-23	0.564421	1.06475	1.31992	0.689539	0.305818	1.51345	-0.00814309	0.528868	0.142185	0.0227798	0.00050544	0.550657	-0.730709	-0.922621	-1.27034	1497
2023-06-26	-0.907125	-0.307033	-0.451578	-0.3163	-0.763371	0.0810484	2.9496	-0.351191	-0.327383	-0.486172	-0.000720944	-0.49507	1.14413	-0.0713053	1.35254	1498
2023-06-27	0.529785	0.52389	-1.00628	-0.385415	-0.0981422	-0.011879	-0.867284	0.257604	0.240028	0.101487	9.66908e-05	-0.280478	0.0680189	0.126796	-0.223601	1499
2023-06-28	1.30555	0.254469	1.13957	1.61519	0.829436	1.45911	1.21213	-0.497041	-0.587847	-0.563432	-3.96044e-05	-0.652127	-0.584918	-1.00261	-2.91729	1500
2023-06-29	-0.0555647	0.569855	0.465618	0.28672	0.234445	-0.316559	0.387691	0.219392	0.185547	0.251873	-0.000312208	-0.557695	0.533297	-0.679334	-0.072663	1501
2023-06-30	-0.249667	-0.329519	-0.770372	-1.28593	-0.858146	-0.712715	-0.0181589	-0.0304541	0.692251	-0.075907	0.000233	0.67137	-0.92704	-0.208935	1.02251	1502
2023-07-03	0.19142	0.0106255	0.0267891	0.20111	0.235113	-0.361114	-0.574485	0.439215	0.154742	0.419328	-3.96044e-05	0.884711	0.750209	0.939527	-0.699164	1503
2023-07-05	0.490652	0.0470716	1.02397	-0.204628	0.591008	0.337356	0.317736	-0.510739	-0.42405	-0.344376	-0.0001759	-0.28546	0.068115	0.395219	0.425202	1504
2023-07-06	1.4361	-0.597821	-0.0930305	-0.148507	-0.335164	1.0171	0.167209	-0.49162	-0.586291	-0.460854	9.66908e-05	-0.955865	0.874501	-0.741457	0.0932129	1505
2023-07-07	-1.21275	-2.33257	-1.80375	-1.62183	-1.84048	-1.57603	-1.48877	0.269428	0.170527	0.151623	0.000232945	0.71617	-1.1519	0.0620487	-0.335706	1506
2023-07-10	-0.0554253	-0.830481	-0.527439	0.0190765	-0.410935	0.383506	0.544662	0.000113098	0.0521026	0.235674	-3.96044e-05	-0.0247734	0.791544	0.330125	-1.31912	1507
2023-07-11	-0.566128	-1.33348	-0.012871	-0.878589	-1.52176	0.104603	-1.13978	0.101216	-0.0514116	-0.103493	-3.96044e-05	0.578022	0.215373	0.989949	1.20844	1508
2023-07-12	-1.23999	-2.92467	-2.56688	-1.25761	-3.12295	-2.73781	-2.20096	-0.222308	-0.0905994	-0.146162	-3.96044e-05	1.03362	0.0421049	1.10336	1.39899	1509
2023-07-13	-0.94388	-0.114823	-1.37541	-1.4116	-1.97711	-2.08188	-0.799591	0.7253	1.11678	7.25476	9.66499e-05	0.211973	2.62975	1.58931	0.0265448	1510
2023-07-14	1.38119	0.735382	-0.826022	-0.211743	0.540762	0.667496	-0.501133	-0.877116	-0.59999	-1.70827	0.000369077	-0.295948	1.16825	0.496331	-0.42481	1511
2023-07-17	-0.551686	0.201882	0.0262278	0.480212	-0.325457	0.488225	1.55492	-0.181004	-0.266218	0.324125	-0.00085709	-0.28249	0.0725661	-0.381045	0.0915778	1512
2023-07-18	0.0327885	-0.000558615	0.258392	0.331668	-0.474895	0.0792223	0.371456	-0.25253	-0.152979	0.699184	9.66772e-05	1.35985	0.152776	0.744046	1.51811	1513
2023-07-19	-0.304247	1.00771	0.549572	2.14181	0.417711	1.22325	2.38179	-0.0183962	-0.111825	0.65008	-3.96044e-05	-0.0338199	0.277928	0.118745	-0.286968	1514
2023-07-20	0.422971	0.764114	1.17436	0.681672	1.82187	-0.355956	-2.52457	-0.131254	-0.00989836	-0.453113	-3.96044e-05	-0.0117246	0.344464	-0.941392	-0.383797	1515
2023-07-21	0.616669	1.66744	0.299744	-0.0639095	-0.298654	0.930411	0.497549	0.0257323	-0.0281683	-0.413638	9.66635e-05	-0.912778	-1.0378	-0.573908	0.0260995	1516
2023-07-24	-1.11867	-0.721103	0.730949	0.365068	0.168513	-0.311273	-0.0384648	-0.595979	-0.4064	-1.27536	-3.96044e-05	-0.0865752	-0.343697	0.0581992	-0.355093	1517
2023-07-25	0.440823	-0.374508	0.654715	-0.65851	-0.471342	-0.952359	-2.62023	-0.0118619	0.0361972	0.0998259	-3.96044e-05	-0.125591	-0.100882	0.311001	0.0900701	1518
2023-07-26	0.687503	-0.650185	-0.542896	-0.738526	-0.447784	0.790614	0.820631	0.0435099	0.0960006	0.107882	-0.000312154	0.36958	0.247211	-0.448456	-1.16801	1519
2023-07-27	-0.427152	0.748011	1.58143	0.831824	1.52217	0.35636	1.1429	-0.148614	-0.128657	-0.0728215	-0.000448531	-1.22248	0.76194	-0.132472	-0.268407	1520
2023-07-28	0.545472	-0.412344	-0.801481	0.00523294	0.0454683	1.60951	-1.23537	0.0198034	0.0830571	-0.05804	0.000233027	0.445116	-1.84034	-1.61836	-0.170696	1521
2023-07-31	-1.15349	1.78707	0.381133	0.184836	0.0454655	-1.40268	-0.323225	-0.11304	-0.19504	-0.30531	-3.96044e-05	0.8591	0.286011	1.03204	1.0723	1522
2023-08-01	2.27574	1.40133	0.975022	1.49044	1.85191	2.75879	1.76191	0.31164	0.12931	0.14962	-3.96044e-05	-1.35994	0.354296	-1.23901	-1.18282	1523
2023-08-02	0.786924	-0.185209	0.641478	0.53569	0.409523	1.61758	0.724738	-0.456945	-0.339576	-0.446322	-0.000448572	-0.221476	-0.264625	-0.0708789	0.193015	1524
2023-08-03	0.102407	-0.99742	-0.151926	0.0471786	-0.878717	-0.296494	-1.36894	-0.0384225	-0.0713409	-0.457903	-0.000448695	-0.534284	-2.05525	-0.532855	0.192059	1525
2023-08-04	-0.0552038	-0.804515	-1.75219	-0.915293	-0.686861	-1.21571	0.285694	-0.114228	-0.0852501	-0.595035	-0.000858153	0.329655	-0.274635	-0.137866	0.25646	1526
2023-08-07	0.609481	0.789823	0.716719	0.0887204	0.728753	0.955168	0.932563	0.024958	-0.0431251	-0.292144	0.000642554	-0.658972	-0.153626	0.720609	0.0922719	1527
2023-08-08	1.42526	0.859675	0.976786	0.56282	0.386132	1.17565	1.32791	0.381832	0.213963	0.366744	0.000642212	-0.353083	-0.892561	-1.60022	-1.5656	1528
2023-08-09	-0.211092	0.476422	-0.468696	0.200803	0.336935	-0.273917	-0.385774	-0.199686	-0.0407219	0.000721255	-0.00031229	-0.260192	-0.855803	-0.818649	0.264204	1529
2023-08-10	-0.716183	0.9744	-0.803172	-0.148447	-0.806479	-0.771666	0.394649	-0.147484	-0.0589895	-0.244793	-0.00058514	-0.158246	0.218832	0.470554	1.54446	1530
2023-08-11	0.623944	0.629756	1.17355	0.452671	0.726893	1.51143	1.00692	-0.0716076	-0.065193	-0.0513408	0.000233191	-0.343375	-0.295681	0.668095	1.737	1531
2023-08-14	0.24056	0.409867	0.701953	0.0472381	0.263834	-0.0836189	1.08415	-0.0458497	-0.0633488	0.0221513	-0.000175995	-0.74194	0.0684432	-0.61092	-1.55438	1532
2023-08-15	0.361701	0.0949959	-0.112417	-0.749345	-0.124754	0.27528	1.1507	-0.225827	-0.183553	-0.536464	-0.000312427	-0.0474294	-0.816504	-0.822281	-0.950497	1533
2023-08-16	0.758936	0.46873	0.484532	-0.0505345	0.433504	1.0456	0.828718	-0.410357	-0.227879	-0.502427	-3.96044e-05	-0.033097	0.701964	-0.211227	-0.939017	1534
2023-08-17	0.100992	0.395254	0.605422	-0.050517	0.166364	0.543774	-0.381503	-1.73022	-1.22277	-2.03068	0.00159651	-0.504111	0.00559283	1.55644	0.497152	1535
2023-08-18	0.601116	-1.24377	-0.0130837	0.214385	0.625788	0.0849596	-0.556433	-0.541911	-0.259518	-0.0439734	-0.000448449	-0.205816	0.193785	-0.408805	-0.139009	1536
2023-08-21	0.100679	1.31221	-0.252647	0.0191852	-0.414367	0.473222	0.315947	0.0117298	0.0310585	0.446369	-3.96044e-05	-0.275322	0.205469	0.46531	0.360407	1537
2023-08-22	-0.278372	-0.591162	0.84653	0.0610529	0.0451534	-0.787315	0.315658	-0.123698	-0.370905	-0.12231	-0.000448572	0.114219	1.23911	1.12265	1.58615	1538
2023-08-23	-0.0888942	-1.44108	-0.31335	0.25664	-0.342454	-1.07182	-0.800721	0.285501	0.428806	0.209504	0.000369363	1.31661	0.852499	0.0604542	-0.229199	1539
2023-08-24	0.342032	1.3412	0.728108	1.14099	0.988639	1.02389	0.0667024	-0.269368	-0.223794	-0.319654	-0.000448572	-0.0303838	1.01671	0.256855	-1.24134	1540
2023-08-25	1.09697	0.731718	0.790921	0.90778	0.864086	0.593505	0.510361	-0.15229	-0.105074	0.152451	-3.96044e-05	-0.14146	-0.0195589	1.03204	-0.370334	1541
2023-08-29	-0.63777	-0.470364	-1.27823	-0.615761	-1.4749	-1.41277	-0.476759	1.32813	0.719714	0.328382	0.000505658	0.770063	0.0630072	1.89338	-0.306439	1542
2023-08-30	-1.27807	-0.110068	-1.4895	-1.56576	-0.609486	-0.875086	0.206299	-0.393849	-0.271547	-0.316768	9.66772e-05	0.934991	0.91567	0.305523	0.428353	1543
2023-08-31	0.411737	-0.339034	1.74367	0.831076	1.59354	0.635076	-1.2917	-1.18774	-0.626943	-0.473138	-0.000175886	-0.347829	-0.217017	-0.253738	-0.405921	1544
2023-09-01	0.737976	0.599981	1.05164	1.03238	0.502495	0.445007	0.111914	-0.165552	-0.204922	-0.370634	-0.000312208	-0.151562	0.235846	0.181215	0.0614452	1545
2023-09-05	0.426861	1.68376	1.21864	0.160524	0.765202	1.61006	2.04667	-0.0615117	0.0233	0.173019	-0.000448613	-0.869064	-2.62652	-2.41029	-0.748628	1546
2023-09-06	0.819822	-0.00205028	0.270332	1.20981	0.881993	-0.011879	0.697384	-0.0780833	-0.0459044	-0.0914497	0.000369404	-0.28294	-0.189555	-1.9733	-0.142115	1547
2023-09-07	0.390416	-0.64551	0.209757	0.190184	0.0925431	0.0367983	0.621697	0.37018	0.119523	0.0192181	-0.000175927	-0.263506	-1.16186	-0.743076	0.199117	1548
2023-09-08	-0.978058	0.653292	-0.0945611	0.133389	0.020946	-0.157865	0.699742	-0.340414	-0.151554	-0.0282271	0.000233027	0.483261	-0.0195589	-0.275777	-0.00555417	1549
2023-09-11	-0.689593	-1.50663	-0.701968	-0.748137	-0.385089	-1.19899	-2.7284	-0.697275	-0.921893	-0.861583	-0.000312236	-0.214665	0.215678	0.197761	0.265764	1550
2023-09-12	-0.484721	0.763873	0.371162	0.744359	0.0926555	0.278004	0.136324	0.53221	0.400115	0.136039	0.000369322	-0.987177	-0.528393	-0.208257	-0.107088	1551
2023-09-13	-0.347603	0.367687	-0.215787	-0.151377	0.307543	-0.0602305	-1.06058	0.281538	0.125689	0.0572751	9.66772e-05	0.246706	-0.00709424	0.0624971	0.733267	1552
2023-09-14	-0.348113	-0.359691	1.57048	1.11873	0.592986	-0.494568	0.341345	0.204022	0.16268	0.130282	9.66635e-05	-0.742662	-0.683966	0.130017	0.818192	1553
2023-09-15	-0.158287	0.760071	-0.257878	0.263188	0.282618	0.0604287	-0.137914	0.013554	0.119228	0.27792	-0.000175872	1.42632	1.02991	1.59495	0.351725	1554
2023-09-18	-0.383502	-0.263628	-0.440448	-0.152451	0.11602	-0.011879	0.844498	0.0850936	-0.0776584	0.0379777	9.66635e-05	-0.291261	0.313714	0.518959	-0.75617	1555
2023-09-19	-0.887902	0.176294	0.23045	0.148576	0.377096	-0.397132	0.235812	0.316889	0.0301701	0.254047	9.66499e-05	0.591898	0.31178	0.837097	0.809689	1556
2023-09-20	-0.124435	-0.0971594	-0.622539	0.0626026	-0.596759	-0.994749	-0.476284	-0.119214	-0.246274	0.161778	-0.000448408	0.422526	-0.154317	-0.327851	0.635186	1557
2023-09-21	1.03897	-0.406686	1.04338	1.30097	1.91588	1.83916	0.967298	-0.509924	-0.432631	-0.390019	9.66772e-05	-1.65737	-0.10548	-1.71085	-1.62655	1558
2023-09-22	-0.297332	0.948417	0.0883966	0.613159	0.750726	-0.759757	-0.43582	-0.0403526	0.0629067	0.0995236	0.000369159	0.648573	0.97892	1.50597	1.07145	1559
2023-09-25	0.10137	0.565577	1.41765	0.571604	1.33295	0.784373	0.638151	-0.285061	-0.0799679	-0.19796	-0.000584649	-0.194851	-0.237246	-1.38356	-1.11564	1560
2023-09-26	0.6206	0.162991	0.376429	0.734	0.580771	0.351408	-0.0578172	-0.121254	0.0243023	-0.123174	-0.000448531	-1.06733	-1.35581	-0.874363	-0.942821	1561
2023-09-27	0.0491935	0.656985	1.30524	0.517154	1.2752	0.887878	0.0166948	0.0741631	0.0139424	-0.094564	-0.00031229	-1.18958	-0.580474	-0.0726185	0.931713	1562
2023-09-28	-0.66047	-0.378699	-1.39416	-1.30817	-1.09358	-1.44417	-0.480354	0.496492	0.528051	0.240371	0.000778289	-0.85138	-0.624005	-0.275477	0.126612	1563
2023-09-29	1.05237	0.268252	-0.116296	0.136137	-0.188678	-0.590746	-0.256922	-0.143307	0.116911	0.280973	-0.000175886	-0.231016	1.29445	1.46642	1.42088	1564
2023-10-02	2.2471	0.408516	1.73794	1.23168	0.834995	1.82865	-0.00814309	0.436324	-0.0823881	-0.26982	0.000232945	-2.26092	-3.73818	-1.47691	-2.46757	1565
2023-10-03	0.918444	-0.777847	0.98151	0.9012	1.1785	1.99873	-0.00814309	-0.112553	-0.0924445	0.64437	-0.000448449	-0.686249	-1.53146	-1.37465	-1.06793	1566
2023-10-04	0.320563	-0.414857	-1.33982	-1.28587	-1.50836	-1.09398	-0.00814309	0.241599	-0.132495	-0.184477	0.000232972	-0.26301	0.115864	-0.491894	-0.214388	1567
2023-10-05	-0.053678	-0.427549	-0.178919	-0.199308	-0.421352	-0.330152	-0.00814309	-0.356891	-0.397613	-0.274994	-0.000312181	-0.0231605	0.0480325	-0.70726	-0.709438	1568
2023-10-06	-1.34989	0.670649	-1.41241	-1.21709	-1.35839	-1.0843	-0.00814309	0.372769	0.317507	0.0376897	0.000641735	-0.0441641	-0.0601042	-0.430366	-0.397895	1569
2023-10-10	-1.3405	-0.568634	-0.443696	-0.472676	-0.98999	-0.883837	-0.0678754	-0.489044	-0.846744	-0.782649	-0.000448367	2.16781	1.5802	1.95377	-0.619368	1570
2023-10-11	0.650049	0.622949	-0.0340225	-0.226019	-0.309234	0.54464	0.210827	-0.471804	-0.0404742	-0.227796	-0.000312181	0.781313	0.906283	-0.419774	1.17771	1571
2023-10-12	0.665335	0.60883	1.38181	1.30996	0.939463	1.76779	0.12616	-0.146057	-0.326023	-0.19227	9.66908e-05	0.107144	0.161243	0.202367	0.0650746	1572
2023-10-13	-0.105317	-0.131463	1.05933	1.09987	-1.06285	1.07073	0.141024	0.0346019	0.102402	0.0294185	-0.0001759	1.97825	-0.174497	-0.143579	-0.825212	1573
2023-10-16	-0.602339	-0.0845483	-0.901394	-0.856444	-0.239042	-1.21704	0.270139	1.272	0.470383	0.31516	0.000641735	0.451683	1.29684	0.133084	-0.222096	1574
2023-10-17	0.117386	0.138482	-0.959146	-0.111284	-0.26304	-0.940096	-0.00814309	-0.133202	-0.398089	-0.208278	-0.000312099	0.522982	0.194821	0.818219	-0.00555417	1575
2023-10-18	1.26274	0.150049	1.26152	0.822458	-0.215999	0.989855	0.269925	-0.114507	-0.0494884	-0.120538	-3.96044e-05	1.49271	1.29931	0.198894	-0.186882	1576
2023-10-19	0.338159	0.0444642	-0.775529	0.0783825	-0.667687	0.257982	-0.181911	0.262503	0.00320137	0.813639	0.000369118	-0.173237	-0.824679	-0.688393	-0.850129	1577
2023-10-20	-0.411726	-0.107871	-0.444803	-0.111792	-0.884784	0.135516	0.135842	0.674251	0.359416	-0.146383	-0.000175832	1.88254	0.79786	0.473756	-0.228765	1578
2023-10-23	-0.275773	-0.10791	-1.09785	-1.18985	0.0448304	-0.453644	0.00674865	2.33937	1.55942	0.777612	-0.000175845	-0.907397	-0.093388	0.198894	0.43966	1579
2023-10-24	1.15581	0.0445017	1.05012	0.951893	0.402733	-0.305693	-0.345839	0.530918	0.166797	0.252881	-0.000175859	-0.57171	-1.12605	-0.75713	0.251943	1580
2023-10-25	0.472688	0.0913358	0.253088	0.44386	0.40205	0.355475	0.364298	0.32654	-0.0128825	-0.116483	9.66499e-05	1.03378	0.155924	0.610616	0.577017	1581
2023-10-26	0.978933	0.558882	1.05634	0.400925	1.06548	0.528483	-0.0826008	-0.272537	0.11781	-0.0689746	-0.000175859	-0.51096	0.37953	1.0745	-0.478262	1582
2023-10-27	0.604532	-1.0093	-1.22723	-0.551414	0.635771	-0.992962	0.0960934	-0.214892	-0.253466	-0.282711	-3.96044e-05	0.382614	-0.556482	-0.610253	0.575472	1583
2023-10-30	-0.626763	-0.71991	-0.566638	-0.0824996	-0.073527	-0.548845	-0.196783	0.324321	0.242846	0.806353	0.000232891	0.753113	0.96303	1.59495	0.246083	1584
2023-10-31	0.823472	2.83851	1.07323	0.327131	1.97273	1.01485	0.155682	0.0607776	0.0234525	0.454671	-0.000175845	-0.0914227	0.103622	0.844316	-0.365509	1585
2023-11-01	0.0141589	-0.606625	0.624479	0.122431	0.0911585	-0.770361	0.0365236	0.440341	0.255281	0.171916	9.66363e-05	-0.631417	-1.339	-0.723337	-0.259413	1586
2023-11-02	-1.53916	-0.585206	-1.63611	-0.696801	-0.964142	-1.44529	-0.0825906	-0.361515	-0.458592	-0.100459	-0.000448367	-0.204398	0.892373	-0.532855	-0.444425	1587
2023-11-03	-1.99312	-1.33799	-2.33337	-2.87606	-1.79697	-2.05397	-0.778329	-0.186098	0.26267	0.118016	0.000641599	0.542311	-1.0071	0.653551	-0.263745	1588
2023-11-06	-0.156487	0.455635	-0.276294	-0.238756	-0.335005	0.0836198	-1.55343	0.155764	0.583976	2.03272	-0.00058454	-0.593619	1.40009	-0.267914	0.472658	1589
2023-11-07	1.81951	0.793155	1.22316	1.37301	0.874232	1.88636	0.456135	0.192061	-0.165622	-0.590173	0.000232891	-1.37575	-1.70462	-1.87628	-1.99111	1590
2023-11-08	0.488754	0.32399	-0.561547	-0.0670185	-0.571251	0.0606652	0.0517205	0.0815935	-0.00330072	0.0085664	-0.000175845	-0.128351	-0.260759	-1.30837	-2.13241	1591
2023-11-09	-0.544991	0.288412	0.108292	0.323359	0.400142	0.0123099	0.166403	0.603526	1.89928	-0.430694	-0.000448408	-0.15907	0.259632	-0.842847	0.356658	1592
2023-11-13	0.251699	0.57781	0.209832	0.16451	0.446736	0.788476	0.265974	-0.185322	-0.562582	0.0473029	0.000232945	-1.52979	-1.23506	-1.28361	-2.56813	1593
2023-11-14	-1.19211	-0.967053	-3.23759	-3.08233	-2.57057	-2.52035	-1.80613	-0.623845	-0.656759	-0.866754	-3.96044e-05	2.06846	0.687304	1.90239	1.54288	1594
2023-11-15	-0.787611	0.346595	0.166972	0.747088	-0.769901	-0.656546	-0.328719	1.35853	0.629914	0.360798	0.000505331	-0.65634	2.62603	1.37033	0.847997	1595
2023-11-16	1.85303	-0.584798	0.0469318	0.11964	0.260907	1.28014	-0.25879	-1.07972	-0.84294	-0.789757	-0.00112969	1.1609	0.611058	0.198439	0.394747	1596
2023-11-17	-0.579934	-0.926232	-0.552966	-0.0948771	-0.267039	-0.730996	-1.49553	0.215057	-0.0409781	-0.0021991	0.000505549	-0.000802747	0.759041	0.0624971	0.351411	1597
2023-11-20	-0.342905	-1.86428	-1.3071	-1.06385	-0.67663	-1.51127	-2.23044	0.465348	0.478053	-0.0499135	0.000505331	-0.735818	-1.48978	-0.140813	1.2774	1598
2023-11-21	-0.513953	-0.476597	0.444008	-0.49148	-0.220128	-0.2722	-1.67366	-1.04607	-0.768861	-0.77367	-0.000448286	2.02838	0.333366	2.12845	0.0709274	1599
2023-11-22	0.72982	2.08741	1.04358	1.02856	0.55095	0.770396	0.998173	0.91974	1.04435	0.68462	-0.000175859	-0.546611	0.715754	-0.00524772	-0.350849	1600
2023-11-24	-2.1384	-0.143234	-1.24846	-1.88049	-0.822862	-1.17202	-0.322952	0.131098	0.109342	0.198284	9.66499e-05	0.127026	-0.331814	-0.996134	-0.704976	1601
2023-11-27	0.426041	-0.826186	-0.0527044	-0.163927	-0.148218	-0.318224	0.194991	-0.328316	-0.4661	-0.414525	-0.000584703	0.645664	2.455	0.525227	0.61674	1602
2023-11-28	-1.22227	-1.78048	-1.37911	-1.39821	-1.14267	-1.62782	-0.760307	0.290095	0.139578	0.0879729	0.00036924	0.592729	-0.262244	0.25827	-0.19901	1603
2023-11-29	0.582159	-0.049675	0.758199	0.327044	-0.246613	1.11047	-0.415368	-0.0313886	-0.1929	-0.0369615	-3.96044e-05	1.0887	0.705424	0.257136	-1.38588	1604
2023-11-30	-0.157336	0.545227	1.2184	0.70684	-0.637217	0.0820176	0.297318	-0.134215	0.152609	-0.0917241	-0.000312154	-0.668178	0.106087	0.321153	0.0345343	1605
2023-12-01	-1.5896	-1.06228	0.605202	-0.584303	-0.443428	-1.08828	0.124144	0.517345	0.255931	0.107158	9.66772e-05	0.47916	0.299024	-0.528331	-0.651713	1606
2023-12-04	0.723134	0.15329	1.08802	0.693215	0.607356	0.923696	0.185113	1.76931	1.17761	0.234214	-0.000721149	0.141462	-0.00821377	0.0603835	-1.53992	1607
2023-12-05	0.686481	0.105405	0.750783	0.611175	0.751695	1.61535	0.0935291	1.02888	0.335139	-0.107274	0.0010507	-1.43098	-2.08713	-1.4657	-0.3024	1608
2023-12-06	0.0489337	-0.145156	-0.0535165	0.0193492	-0.441571	-0.438021	0.682474	-0.202098	-0.476227	0.383176	-0.000175845	0.111264	-0.432733	-0.207137	-0.347455	1609
2023-12-07	0.238	-3.71655	-0.0736271	0.104078	0.434824	-0.766589	-0.338054	-0.298821	0.860987	0.0132568	-3.96044e-05	-0.0262317	-0.459619	0.26379	0.801861	1610
2023-12-08	0.0145105	0.922315	0.975121	0.613635	1.28196	0.742831	0.651378	0.400027	-0.0141481	0.594791	-0.000448408	-1.07039	-0.306827	0.529294	-0.0476563	1611
2023-12-11	-0.467009	1.81927	-0.0133216	-0.150603	-0.342041	0.130038	0.599585	-1.57038	-1.00613	-1.13631	-0.0001759	-1.22548	-2.14664	0.590566	-0.727974	1612
2023-12-12	0.736396	-1.18129	-0.860597	0.0193942	-0.9014	0.0354556	-0.0587482	0.0737757	-0.198132	-0.019638	-3.96044e-05	-0.372327	0.0675607	-0.335537	0.926945	1613
2023-12-13	-0.70731	-0.364286	-0.0534997	0.317067	0.118223	-0.531768	-0.160001	0.686266	0.392916	0.146636	0.00036924	0.0377283	-0.594508	0.127082	-0.0474844	1614
2023-12-14	-2.87753	-4.486	-4.06097	-3.36737	-2.96618	-3.04893	-3.24767	0.0228777	0.373471	0.0646618	-3.96044e-05	3.39384	3.07333	1.36716	2.15978	1615
2023-12-15	-0.52602	0.308909	1.81208	0.814433	1.22573	-0.058142	0.45642	-0.624455	-0.736523	-0.371322	9.66499e-05	-0.791906	0.454454	0.123862	3.72033	1616
2023-12-18	0.294038	1.5034	-0.271805	1.08524	-0.126213	0.404985	0.593373	0.333805	-0.044931	-0.0953182	-0.000584703	-0.502596	-0.624618	0.763723	1.84222	1617
2023-12-19	-0.893929	0.684902	-1.12413	-1.66112	-1.77768	-1.58086	-0.0590804	-0.259967	-0.348108	-0.200749	0.000232972	0.881299	-0.079225	-0.516816	0.649383	1618
2023-12-20	-0.318046	0.157503	0.403075	1.27809	0.169353	0.0110798	0.33809	0.676077	0.156633	0.243728	-3.96044e-05	-0.363763	0.123535	0.887202	0.672754	1619
2023-12-21	-0.494103	-2.00383	-0.646417	-0.107033	-0.920714	-0.607708	0.124153	0.0528688	0.249665	0.1238	9.66635e-05	0.276151	0.49027	-0.386129	-0.445178	1620
2023-12-27	-1.64239	-0.161802	-2.43056	-1.79533	-3.99025	-1.24211	0.113934	-0.263896	0.976377	0.189273	0.000641531	1.4179	-0.362896	1.13033	-1.17809	1621
2023-12-28	0.0150219	-1.22933	0.809804	0.756738	-0.511175	-0.011879	-1.7414	-0.497624	-0.275188	-0.0261328	9.65818e-05	0.420563	0.488792	1.47671	-1.35692	1622
2024-01-02	1.9003	0.979695	2.29475	1.56005	2.21685	1.65354	1.8319	1.15026	0.0442454	-0.239308	-0.000584431	-0.624522	-0.753979	-0.741726	-1.29084	1623
2024-01-03	0.838142	2.01707	0.960686	-0.121341	1.02301	1.16232	0.352654	-1.11813	-1.10352	-0.96016	-3.96044e-05	-1.40521	-1.62762	-1.12691	-1.06355	1624
2024-01-04	-0.055133	1.24206	-0.946898	-0.710322	-0.479496	0.219402	0.458837	0.624903	0.399833	0.0786081	0.000641395	-0.189561	-0.809807	-0.194213	-0.661463	1625
2024-01-05	-0.422793	-0.110896	0.00689386	-0.665608	-0.405356	-0.289374	-0.71392	-0.0503581	-0.0264939	-0.284243	-0.000311963	0.842335	0.0301533	-0.703171	-0.632599	1626
2024-01-08	0.522365	-0.793176	-0.369495	-0.357085	-0.481681	0.0574484	0.448992	1.31908	0.425351	0.0109515	-3.96044e-05	-1.72482	-0.355959	-0.517891	-1.49335	1627
2024-01-09	0.399059	0.534761	0.819918	0.64676	1.25028	0.613464	0.676482	-0.448298	0.0653587	-0.27208	-0.000584486	0.473828	0.675966	-0.522236	-0.749308	1628
2024-01-10	-0.0899445	1.58504	-0.489214	-0.134427	-0.00407167	-0.011879	0.174206	0.189522	1.58168	0.73685	-0.000175859	-0.488555	-0.415964	-0.657705	0.491775	1629
2024-01-11	1.04247	0.39563	0.344124	0.256699	1.06917	0.895863	-0.215825	-0.18474	0.20114	0.000506966	-0.000312154	0.0733329	0.141813	-0.400098	0.117843	1630
2024-01-12	-0.69891	-1.43875	-0.310514	-0.469461	-0.802222	-0.919621	-0.0334783	-1.80237	-0.646195	-0.744916	-0.0001759	1.36323	0.0423858	0.25827	-0.170166	1631
2024-01-16	1.26641	2.56183	1.53869	1.25051	2.0358	2.20864	1.04937	0.109802	0.391133	0.0993243	-0.000175913	-0.986453	-0.0319425	-1.6037	-2.2078	1632
2024-01-17	0.879872	1.61522	0.486553	-0.121091	1.57498	1.35958	0.426111	-0.245323	-0.408417	-0.193115	-0.000857744	-1.47637	-0.629668	-0.479464	-0.751914	1633
2024-01-18	-0.348369	-0.310146	-0.0931225	-0.289174	0.462882	-0.604511	-0.00309668	-0.831135	-0.444895	-0.426733	0.000369527	0.0254887	-0.522486	-0.209617	0.435122	1634
2024-01-19	-0.626219	0.0452755	-0.472545	0.145366	0.241571	-0.413581	-0.159566	0.140173	0.11611	-0.210065	-0.000175968	0.776006	0.470849	0.942672	0.213023	1635
2024-01-22	-0.228251	-0.334233	-0.152684	-0.708294	-0.175154	-0.129829	-0.0636807	-1.19586	-1.27602	-0.447325	-0.000312372	-0.427805	-1.54217	-0.409697	-0.753513	1636
2024-01-23	0.552211	0.68501	1.32693	0.943203	0.804263	0.46046	-1.0194	0.135737	-0.546882	-0.264621	0.000505876	0.0197095	0.134542	0.264683	0.567636	1637
2024-01-24	-0.123939	-1.49812	-1.43275	-1.2954	-2.11546	-0.837532	-0.717703	0.0593338	-0.10088	-0.0256627	0.000369363	0.0385333	1.27378	0.330494	1.41452	1638
2024-01-25	0.17055	0.426653	1.28611	0.759277	1.07955	0.459385	0.549485	-0.133824	-0.160221	-0.144116	-0.000175913	-0.101699	0.243117	-0.67859	-0.687948	1639
2024-01-26	-0.574787	0.271217	-0.573683	-0.274416	-0.938962	-0.200556	0.361447	0.97008	0.339672	0.441876	9.67044e-05	-0.339423	0.0801912	0.399649	-0.394442	1640
2024-01-29	-0.297945	-0.37048	1.1897	0.550957	0.144253	-0.129686	0.168924	0.72742	0.334467	0.0439798	0.000232972	0.16565	0.204244	1.06152	1.23457	1641
2024-01-30	-0.524655	0.0455163	-0.735621	-0.0227937	-0.373888	-0.0354297	-0.225695	-0.232612	0.149302	-0.650963	-0.000175886	1.0504	0.153905	0.126796	0.204526	1642
2024-01-31	-0.438551	-1.75853	-0.213365	-0.694	-0.894921	-0.129579	-0.423372	-0.240436	-0.467272	-0.219565	-0.000993957	0.490477	0.0175435	-0.0712339	-0.3422	1643
2024-02-01	-0.0724871	-0.121939	-0.193148	0.0889958	-0.177598	0.790245	0.629695	0.209702	0.121678	0.0376103	0.000642144	-0.447299	-1.06765	-1.13807	-0.859444	1644
2024-02-02	1.355	2.78712	1.57213	1.40712	2.4159	1.31836	0.603332	0.00808519	0.00354843	0.0998755	-0.000312263	-0.679242	1.37367	-0.139915	0.0806381	1645
2024-02-05	1.29538	0.269518	1.03645	1.34735	0.878537	0.753407	0.304776	-0.307861	-0.0869265	-0.130086	-0.000857907	-0.923308	-1.82986	-0.343222	-0.394852	1646
2024-02-06	-0.590227	-0.925287	-0.296423	-0.801254	-0.199248	-0.94407	-0.381658	0.152103	0.475048	-0.0728725	0.00105136	0.637056	-0.529221	0.467394	0.254387	1647
2024-02-07	-0.504992	-0.0139785	-0.356528	-0.558545	0.729646	-0.154798	0.168567	0.586548	0.330468	0.198688	-0.000175927	0.525834	-0.0579676	-1.15951	-0.74637	1648
2024-02-08	-0.124083	1.40391	-0.0939489	0.131927	0.142898	0.775806	0.102888	0.422723	-0.0679232	-0.00755452	0.000233027	-0.747792	0.133921	-0.833372	-2.40485	1649
2024-02-09	0.257421	0.127076	-0.154357	-0.107389	0.36204	-0.632813	-0.189848	0.832273	0.42281	0.262914	0.000505495	-0.330639	0.754314	0.0641936	-0.28622	1650
2024-02-12	-0.714274	-0.0376016	0.168145	-0.0369818	0.239933	-0.535352	-0.0131918	1.239	1.08589	0.109987	-0.000312127	-0.501846	0.631954	0.478641	1.01431	1651
2024-02-13	2.17734	1.55445	1.09848	0.357329	2.53526	1.85209	-0.00814309	-0.150833	-0.145193	-0.204387	0.000505386	-1.09273	-0.13179	-0.281285	-0.978507	1652
2024-02-14	-0.226653	-0.282405	-0.296875	0.626621	-0.243592	-0.707508	-0.00814309	0.855083	0.803076	0.302033	-3.96044e-05	-0.656392	-2.01372	0.339605	1.10453	1653
2024-02-15	-0.987291	-0.387999	-0.518635	-0.249234	-1.0405	-0.465952	-0.00814309	0.000683096	0.251459	0.561449	-3.96044e-05	0.98397	1.35966	0.610616	2.73056	1654
2024-02-16	-0.17584	0.149487	-0.154552	-0.13598	0.141832	-0.559776	-0.00814309	0.0492349	-0.156666	0.0236764	-0.000175832	-0.388674	0.94382	-0.0733708	-0.737824	1655
2024-02-20	0.585581	-0.575797	-0.89901	-0.769441	-0.124125	-0.699962	-0.124282	0.00476395	1.19834	-0.0754036	-0.00140262	1.63838	0.104371	0.941621	1.65538	1656
2024-02-21	-0.227416	0.465686	-0.0734484	0.300619	-0.172636	0.319919	-0.0788543	-0.223392	-0.280238	-0.346285	0.000642076	-0.179663	0.0175677	-0.476845	-0.467262	1657
2024-02-22	-0.141083	0.359396	0.0671478	-0.346361	0.432098	-0.0356023	0.259477	-0.282077	-0.0255574	-0.218362	-0.000857662	-0.201381	-0.0319318	-0.276378	-0.94484	1658
2024-02-23	0.101146	-0.329294	-0.254086	-0.401747	-0.269197	-0.461936	0.12307	-0.302958	-0.318326	-0.203696	0.000642144	0.13275	-0.904956	0.400997	0.933731	1659
2024-02-26	0.18754	0.475735	-0.534141	-0.0368153	-0.0516515	0.628066	0.00194827	1.5368	1.3624	0.378458	0.000233	-0.0666247	-0.537169	-1.23219	-0.472512	1660
2024-02-27	0.152841	-0.410647	-0.0331293	-0.162861	-0.196995	-0.201767	0.0170841	0.970747	0.312945	0.799573	-3.96044e-05	0.368733	0.38483	0.474833	0.164864	1661
2024-02-28	0.824983	0.230787	0.287211	0.327552	-0.124472	1.20266	-0.0131884	1.96422	0.680087	-0.279974	0.000369199	-0.192719	-0.843996	-0.623191	-2.09878	1662
2024-02-29	-0.0370979	-0.937409	0.729374	0.539044	1.15741	-0.179143	-0.0030978	-0.51725	-0.251009	0.221253	-3.96044e-05	0.781508	-0.032336	0.20143	1.48809	1663
2024-03-01	-0.261036	0.325319	-0.495083	-0.27592	0.286053	-0.631574	-0.0939226	0.391743	0.433669	0.309821	9.66363e-05	0.0400728	0.943442	-1.04571	-0.745585	1664
2024-03-04	0.169604	0.254582	-0.593952	-0.681718	-0.0513231	0.178533	0.128086	1.94937	0.882905	0.965936	-3.96044e-05	2.48662	0.927469	1.17261	0.561548	1665
2024-03-05	0.272705	-0.376445	0.0268953	-0.148616	-0.0754509	0.321905	-0.11914	-1.55845	-0.360886	-1.25204	0.000641395	1.82194	1.99589	-0.280352	-0.309943	1666
2024-03-06	-1.20985	-1.16427	-1.03075	-0.622767	-0.582525	-1.67367	0.0524051	0.733058	1.14332	0.442383	-0.000584377	0.378152	-0.342567	0.612001	3.02251	1667
2024-03-07	-0.747327	-1.31397	-0.54979	-0.537244	-0.72974	-0.977021	-0.270591	0.208889	0.207689	0.295581	0.000641327	0.485496	0.837767	1.54436	0.518159	1668
2024-03-08	0.0320171	-1.10854	0.00689386	-0.770824	-0.343241	-0.222939	-0.361739	0.383303	0.0256295	-0.179499	0.000232673	0.842928	0.778486	-0.00524772	0.669377	1669
2024-03-11	0.291968	-0.396202	0.265177	0.628583	0.433645	0.434029	-0.18507	1.19489	0.734064	1.93988	-0.00262844	0.410914	-0.346816	0.984566	-0.600503	1670
2024-03-12	0.170473	0.964015	0.205782	0.296879	-0.00330825	0.152726	-0.0890527	-0.245087	-0.389938	-0.615678	-3.96044e-05	-1.01865	0.0273071	-1.12826	-0.245968	1671
2024-03-13	-0.435771	0.0217201	-0.509837	-0.175367	-0.0275708	-0.528623	0.350756	0.440737	0.0721369	-0.0147149	0.00105103	0.307379	-0.195505	1.05227	1.76416	1672
2024-03-14	0.793613	0.520212	1.12138	0.700853	1.32704	0.881762	0.279731	-0.567093	-0.544171	-0.409875	-0.000993862	-0.436437	1.53334	-0.13644	0.453768	1673
2024-03-15	0.239139	1.09653	0.00689386	0.102837	0.0932724	0.365935	0.0978582	-0.657669	-0.660622	-0.744096	0.000778371	0.0806309	0.549229	1.03647	-0.0436354	1674
2024-03-18	0.169897	-0.0376205	0.046803	0.0889366	0.622712	0.153704	0.133144	-0.656894	-1.05232	0.202356	-0.000448531	-0.320916	-0.121523	-1.64085	-1.51896	1675
2024-03-19	0.651927	1.84854	0.546387	0.326463	0.501138	0.794902	0.0423032	-1.95298	-1.81467	-1.3297	0.000505604	-0.217677	-0.577917	-1.61779	-2.15591	1676
2024-03-20	-0.278067	1.05452	0.0669203	0.00523294	0.715307	-0.107012	-0.00309885	1.93768	1.72258	0.556094	9.66635e-05	0.0759373	-0.191582	0.266486	0.85999	1677
2024-03-21	-0.450884	-0.10693	-0.093141	0.607355	1.97215	-0.91275	-0.00309892	-0.834012	-0.135602	0.597996	-3.96044e-05	0.605149	1.28623	0.668839	0.0759352	1678
2024-03-22	0.996011	-0.30414	0.888785	0.947508	-0.216051	1.17457	1.48186	-0.641301	-0.814009	-0.647931	-0.000175872	0.00214557	-1.93735	-0.476325	-0.0870435	1679
2024-03-25	-0.260541	0.0553721	-0.39441	-0.628189	0.020946	-0.463797	-0.948752	1.98232	1.20928	0.587329	-0.00044849	0.202903	0.154315	0.53283	0.480974	1680
2024-03-26	-0.191957	0.159651	0.167326	0.258331	1.06177	0.0118734	0.364368	-0.0162018	-0.0473434	-0.212021	-3.96044e-05	0.102192	0.349613	-0.34099	-0.573734	1681
2024-03-27	0.306991	-0.292553	0.167445	-0.00883751	0.704172	0.297233	0.464496	-0.227893	-0.44452	-0.455645	-0.000448613	0.590952	-0.73701	-0.682327	-1.33455	1682
2024-03-28	-0.967413	-0.0258433	0.408791	-0.0369717	-1.1584	-0.011879	-0.0483437	0.368242	0.247331	0.244772	0.000642008	1.01938	0.0386354	0.739128	1.81093	1683
2024-04-02	0.686837	0.206101	0.65148	0.822972	1.55283	0.274002	0.283211	-1.78894	-1.41315	-0.889598	9.66772e-05	2.39153	2.50625	1.19356	-0.0459581	1684
2024-04-03	-0.847599	0.113176	-1.16001	-0.826572	-0.755402	-1.08123	0.0420667	0.126942	0.133215	-0.289579	9.66635e-05	0.698664	1.28973	0.257986	-0.208172	1685
2024-04-04	-0.486863	-0.037424	-0.754248	-0.47235	0.280043	-1.35591	0.0370398	0.78761	0.0522014	0.409028	9.66499e-05	0.584104	1.59972	0.387485	0.519188	1686
2024-04-05	1.49851	-0.10693	0.487305	0.510949	-1.01734	0.71764	-0.00814309	-0.267503	-0.0812446	-0.161067	-3.96044e-05	0.186934	-0.486679	-0.793257	-1.06183	1687
2024-04-08	0.0489223	0.194162	-0.233444	-0.303987	1.10631	-0.435888	-0.178864	1.16141	1.7712	0.58856	-0.000312127	0.972574	2.16599	1.49627	1.56884	1688
2024-04-09	-0.00267079	-0.0837128	-0.0531491	-0.28943	-0.426684	-0.481646	0.0470988	-0.834369	-0.907754	-0.0498464	-0.000584812	1.6206	0.266989	2.27318	1.16574	1689
2024-04-10	1.79595	1.32333	2.40142	1.86557	2.24975	2.66117	0.117375	0.418667	0.148778	0.0386789	0.000505604	-1.12871	0.204581	-0.818232	-0.509019	1690
2024-04-11	0.287235	0.306971	0.310606	0.132786	-0.446342	-0.393171	0.152457	-0.243335	-0.235416	-0.216856	-3.96044e-05	0.537137	-0.141708	0.433859	0.0333938	1691
2024-04-12	0.864895	-0.10612	1.53186	1.11454	0.3248	1.11084	-0.00312547	-0.977491	-1.33926	-1.44396	-3.96044e-05	2.51553	2.00258	1.41567	0.574276	1692
2024-04-15	-0.087584	1.26559	0.0681157	-0.123119	0.41764	0.204039	0.0319954	-1.32436	-0.7672	-1.2859	0.000232918	-2.68936	-1.18206	-1.61397	-1.73015	1693
2024-04-16	1.23401	0.338153	0.333702	0.419142	-0.188977	1.36262	-0.0031261	0.0871947	-0.127672	-0.0576326	9.66363e-05	1.10254	-0.392167	-0.445713	-0.814057	1694
2024-04-18	-1.17142	0.0196033	-0.646231	-0.39442	-0.282641	-0.616226	-0.0131601	-0.163456	-0.136085	0.131382	-3.96044e-05	0.569395	0.413244	-1.54003	1.63509	1695
2024-04-19	-0.223525	-0.0940176	0.108815	0.977381	-0.517232	0.326266	0.0971992	0.0606805	-0.0779515	-0.0202967	-3.96044e-05	-0.190693	-0.48268	-0.787364	-1.68704	1696
2024-04-22	-0.359878	0.224	0.00689386	0.809838	0.652582	-0.39827	-0.00814309	0.981342	0.740823	1.31293	-0.000175845	-2.12549	-1.04979	-0.202354	0.441533	1697
2024-04-23	-0.769958	0.0195446	-0.807142	-1.32899	-0.0257776	-0.973671	0.20245	-0.188565	0.0690673	-0.310714	-0.000448408	-0.357471	-1.73304	-1.47048	-0.780879	1698
2024-04-24	0.764617	0.314192	0.169457	0.00523294	0.580955	-0.179582	0.0670391	-0.774774	-0.449567	-0.449687	-0.000721217	-0.438274	0.413657	-0.00524772	0.567153	1699
2024-04-25	-0.513916	0.43781	-0.683162	-0.850273	-0.142238	-0.490035	-0.00814309	0.0226831	0.0460009	-0.0812298	0.000369404	-0.126111	0.493912	0.062123	-0.909144	1700
2024-04-26	-0.224558	2.32997	0.717279	0.289944	0.207432	-0.536156	0.0119029	-0.303623	-0.165685	-0.0130618	-3.96044e-05	1.08956	0.520346	0.664399	-0.802253	1701
2024-04-29	-0.498411	-1.04282	-0.622422	-1.11673	-0.772748	-0.889645	-0.740539	-0.0176625	0.418154	-0.306465	-0.000175927	-0.498995	-0.528176	1.31239	-0.602645	1702
2024-04-30	1.68537	0.901961	0.676873	0.558228	1.55895	1.77257	0.4084	-1.19087	-1.11911	-0.412937	-0.000721421	-1.30228	-1.55175	0.189966	-0.611454	1703
2024-05-01	0.201113	0.0967518	0.088244	0.374855	0.507992	-0.155392	0.0119192	-0.923076	-0.263062	0.413112	-3.96044e-05	-0.273413	-0.395641	0.576673	-0.00555417	1704
2024-05-02	-1.09158	-4.40268	-0.521339	-0.264951	-1.747	-1.22641	-0.00814309	0.248813	0.0451059	-0.0128245	0.00145994	-0.695128	-0.550271	-0.00524772	-0.399835	1705
2024-05-03	-0.224477	-1.07985	-1.28792	-0.604723	-1.6676	-1.6401	-0.00814309	1.31916	0.600985	0.318692	0.000369077	0.213591	0.55426	0.952452	0.908615	1706
2024-05-07	0.491839	1.96229	0.0674164	0.217771	0.608763	0.176028	-1.11322	-0.249132	-0.558942	-0.201821	-0.00085709	1.13688	1.59483	0.750232	0.97287	1707
2024-05-08	0.116537	0.914651	0.249153	0.459498	0.114846	0.529623	-0.00814309	-0.449956	-0.20884	-0.224663	-0.000312208	-0.550787	-0.071944	-0.50786	-1.07017	1708
2024-05-09	-0.496928	0.267737	-0.316058	-0.0231927	-0.0729544	-0.506369	0.0572504	0.617888	0.309467	0.0741802	0.000369281	0.731154	0.792225	0.497364	-0.0919277	1709
2024-05-10	-0.463784	0.165848	-0.0334414	-0.321335	-0.190481	-0.0353869	0.303572	-0.86815	-0.74569	-0.519202	-0.000312181	2.11939	2.04059	0.926132	1.85393	1710
2024-05-13	0.202381	0.33442	-0.456424	-0.49057	0.302803	-0.105875	0.318368	0.71891	0.202552	0.0535573	-0.000175913	-1.37944	-1.05557	0.912126	-0.462591	1711
2024-05-14	-0.430065	0.344906	-0.435357	-0.348067	-0.166917	-0.293526	0.0420633	-0.538812	-0.429382	-0.165701	-0.000312263	0.46028	0.596266	0.598759	-0.51001	1712
2024-05-15	-0.653811	-1.69475	-0.834911	-0.980286	-0.590755	-1.20321	-0.736816	1.57033	0.832531	0.467332	0.000914462	0.0696119	0.748428	2.00476	1.57109	1713
2024-05-16	-0.105649	0.234557	-0.292962	-0.331405	0.0916167	-0.221169	-0.0534193	-0.38657	-0.535696	-0.115559	-0.000448408	0.864423	1.6499	0.746116	0.0757738	1714
2024-05-17	0.151779	0.335811	0.126787	-0.288803	0.843709	-0.0815798	0.253375	0.556796	0.787626	0.171278	0.000369199	1.09785	-0.000318993	0.166838	-0.909144	1715
2024-05-20	-0.0713024	0.560262	0.166854	-0.064704	0.442847	0.243844	0.549468	1.35866	2.79424	0.329929	-0.000448408	0.748089	3.91058	-0.465225	0.571753	1716
2024-05-21	0.562938	-0.0370961	0.126941	-0.0227341	0.278364	0.197662	0.152451	-0.45325	0.549269	-0.0405885	-0.000448531	0.2621	-0.307597	-0.178637	1.08542	1717
2024-05-22	0.390733	0.434932	0.387482	-0.399796	0.768034	0.688641	0.137334	-0.364581	-0.261488	-0.287986	-0.000448654	-0.929139	0.304382	-0.063154	-1.0556	1718
2024-05-23	0.492418	0.601562	0.187405	0.312412	0.114148	0.152031	0.072095	-0.432839	0.174658	0.0221226	9.6759e-05	-2.36925	-2.35476	-0.880502	-0.665337	1719
2024-05-24	-0.531942	-0.193679	-0.494157	-0.399573	-0.00235066	-0.011879	0.0119137	0.13596	-0.288998	0.146509	0.000233081	-0.73368	0.0738396	-0.774094	-0.845473	1720
2024-05-28	-0.60168	-0.0258433	-0.532946	-0.551612	-0.842827	-0.876309	0.122199	-0.109286	0.486578	-0.20799	-0.00113068	0.316654	1.75373	1.40668	0.121534	1721
2024-05-29	1.22791	0.778308	1.36907	1.00881	0.698254	1.08701	0.20732	-0.289046	-0.36724	-0.151971	-0.000312509	-0.392697	0.797823	-0.648326	-0.687948	1722
2024-05-30	-0.582971	-1.1325	-0.514945	-0.343875	-2.30017	-0.550604	-0.0131524	0.184755	-0.130956	-0.158258	0.00146069	0.188804	-0.909361	-0.358896	-0.35105	1723
2024-05-31	-0.378929	0.601002	-0.173451	0.0191841	-0.0262069	0.0348926	-0.424157	-0.320143	0.0346573	-0.0564406	-0.001267	-0.0671084	-0.47428	0.933297	0.0810927	1724
2024-06-03	-0.34525	-1.31554	-0.872644	-0.78824	-1.87378	-1.01438	0.0420043	0.366414	-0.0130121	0.0306966	0.00105147	-0.544702	-1.67781	-1.12139	-1.36957	1725
2024-06-04	0.989429	-1.34777	0.246415	0.144183	-1.17187	0.920466	-0.143557	0.505357	0.158529	0.121741	0.000369322	-0.600883	-1.28362	-1.14219	0.262008	1726
2024-06-05	0.355501	1.48733	0.266673	0.199945	0.880449	-0.011879	0.402958	0.117498	0.206479	-0.0282271	-0.0001759	0.604238	-0.202446	-1.28702	-0.139117	1727
2024-06-06	-0.360843	-0.284642	-0.352718	-0.203379	-0.52778	-0.455441	-0.128417	-0.141887	-0.260598	-0.132262	-0.000584922	0.901299	1.28622	0.240986	0.349653	1728
2024-06-07	1.0702	0.648485	1.52932	0.827191	1.04568	1.69929	0.0670329	-0.508368	-0.634955	-0.614123	-3.96044e-05	-2.38072	-0.0761254	-0.746949	-0.539524	1729
2024-06-10	0.133215	0.366322	1.13555	-0.0785299	0.211051	-0.529563	0.036955	0.010618	-0.0807718	-0.0869259	-0.000175968	-0.355919	-1.13396	-0.630296	-0.230107	1730
2024-06-11	0.150106	0.410112	0.370925	0.116926	0.471768	0.293816	0.337423	-0.77113	-0.827353	-0.482467	0.000505767	0.518529	-0.862547	-0.70028	-1.00844	1731
2024-06-12	-1.26181	-1.64093	-2.20827	-1.63516	-1.62083	-2.41758	-0.00814309	0.258081	0.261417	0.283528	-0.000312263	0.405329	0.243393	0.689784	1.40064	1732
2024-06-13	0.950819	0.974123	1.75702	1.10178	0.426617	1.38497	-0.13331	-0.539984	-0.460925	-0.431609	-0.000175954	-0.780592	-0.292273	-0.891216	-0.816185	1733
2024-06-14	-0.189656	0.544616	1.16122	1.10859	-0.647631	0.550396	0.182094	-0.2975	0.0235836	-0.0952641	-0.000175968	0.871178	-0.0781675	-0.517353	-0.601123	1734
2024-06-17	0.286244	0.5539	-0.479886	-0.0507982	0.188287	0.411167	0.0118761	0.105366	0.10947	0.794264	0.000233109	-0.548465	0.0292857	0.697794	0.0866358	1735
2024-06-18	-0.495741	-0.0147131	-0.317021	-0.134768	-1.70659	-1.25423	-0.098238	-0.502512	-0.161982	-0.399232	-0.000175954	0.15603	-0.224988	0.374842	-0.9369	1736
2024-06-20	-0.343327	1.03938	0.634918	0.397513	1.70068	-0.105239	0.297088	-0.154824	0.103064	-0.08519	-3.96044e-05	1.21918	2.09672	0.497883	1.65596	1737
2024-06-21	-0.0879124	0.724802	0.291114	0.37027	0.641489	0.3619	0.0168645	-0.300521	-0.00836839	-0.0227915	9.67453e-05	-0.824137	0.366311	1.47972	3.5869	1738
2024-06-24	-0.685726	0.260323	-0.66246	-0.542042	0.044777	-0.362323	-0.123192	-1.42157	-0.841483	-0.436589	-3.96044e-05	-0.348083	-1.68507	0.147377	0.733737	1739
2024-06-25	-0.00267079	-0.0588386	0.4529	0.103338	0.140061	0.291793	0.206919	0.502049	0.179532	0.0137372	0.000233054	-0.226742	-0.0195589	-0.710507	-2.35069	1740
2024-06-26	0.663333	1.07067	0.474154	0.735712	0.710502	-0.175469	0.176809	-0.398326	-0.153203	-0.196885	-0.000721353	-1.25227	-1.43734	0.791403	-0.657138	1741
2024-06-27	-0.0708915	-0.00398256	-0.52124	-0.388475	0.187057	0.0114804	0.101784	0.253027	0.359002	0.126458	-0.000994626	1.07784	0.0497005	0.177127	0.0382078	1742
2024-06-28	-0.15624	0.170781	-0.0539621	0.187917	0.305406	-0.687879	-0.0880864	-0.517235	-0.377735	-0.134908	-0.000585632	0.289251	0.960796	0.418184	1.41304	1743
2024-07-01	0.985232	0.704106	-0.337635	-0.13531	1.13144	0.477344	0.0468198	0.846668	0.274356	0.128689	0.00105223	-0.137495	-0.263074	-1.65494	0.665001	1744
2024-07-02	-0.871122	-0.0475889	-0.175283	-0.401715	0.185844	-0.0818624	0.136719	-0.330208	-0.135116	0.200989	-0.000721899	0.0709685	0.107199	0.54962	0.735961	1745
2024-07-03	-1.14851	-0.0802192	-1.24397	-1.21005	-0.899402	-1.40497	-0.0730743	-0.742596	-0.664472	-0.536118	0.00064269	1.32386	1.55583	0.422854	1.47788	1746
2024-07-05	0.117307	-0.843509	-0.575723	-0.564618	-0.71346	-0.565634	-0.103063	-1.40457	-1.70948	-1.28014	0.00146024	0.762034	0.826858	1.32098	-0.680485	1747
2024-07-08	0.100118	0.0178618	-0.133504	-0.299789	-0.0977441	0.0341919	0.00684597	-0.0177922	0.180801	0.176483	9.66635e-05	-0.163342	0.740847	-0.90636	-0.529267	1748
2024-07-09	-0.0197991	0.661081	0.44845	0.588003	0.187094	0.0803038	0.201639	0.459094	0.21769	0.0912719	0.000232891	-0.455802	0.100069	-0.735846	-0.413004	1749
2024-07-10	-0.482775	0.332905	-0.193925	-0.757531	0.352853	-0.242233	0.156601	-0.162713	0.163228	0.0720547	-0.000448367	0.702574	-0.240606	0.0559708	-0.33445	1750
2024-07-11	0.186059	-3.48052	-0.934475	-1.07092	-1.2383	-0.677981	-0.932673	-0.208489	-0.0400721	0.271116	9.66635e-05	1.07865	0.127901	0.603582	0.200314	1751
2024-07-12	0.134492	-0.802864	-0.631712	-0.900298	0.0924229	-0.286674	-0.398651	0.161094	0.147414	0.705904	9.66499e-05	-0.159695	-0.565214	-0.920786	-1.38375	1752
2024-07-15	0.59647	-0.0147187	-0.192286	0.00523294	0.187632	0.217083	0.477425	2.45251	1.74876	1.62859	9.66363e-05	0.598	0.0175999	-0.00524772	-0.475426	1753
2024-07-16	0.407282	0.728977	0.5451	0.388834	0.116137	1.1842	0.456793	0.041238	-0.234957	0.969352	-3.96044e-05	0.931995	0.212137	-0.62333	-0.742461	1754
2024-07-17	-0.0538756	-2.26645	-0.948996	-0.679189	-2.54017	-0.0580526	-0.398049	-0.381034	-0.30353	1.00406	-0.000720944	1.5898	0.0728569	2.31087	1.37076	1755
2024-07-18	0.202081	0.433522	0.40467	0.484052	0.309712	0.0342946	-0.0431552	-0.0880479	0.154785	-1.28488	-0.000312236	-0.779582	-0.847367	-1.4578	-0.903542	1756
2024-07-19	0.474387	0.432323	0.505141	0.705258	0.645266	0.728772	0.466733	0.867626	0.346783	0.0531689	0.000778126	-2.75808	-2.63635	-1.93415	-1.36811	1757
2024-07-22	0.558327	-0.36097	0.166575	0.156581	0.404236	1.26943	0.196612	0.239946	-0.343651	0.752874	-0.000175859	-0.544783	-0.0980798	-1.08951	-0.817966	1758
2024-07-23	0.116156	-1.2151	0.506654	-0.0635775	0.379655	0.456684	0.0517633	-0.588548	0.173141	-0.255328	-0.000175872	0.420288	-0.039206	0.123318	0.447768	1759
2024-07-24	0.336501	-3.01181	0.0469244	-0.118559	-1.82687	0.434569	-0.637654	-0.242415	-0.756566	0.426457	-0.000857498	0.77723	0.44037	0.506321	1.32514	1760
2024-07-25	0.437518	0.637035	-0.153184	0.569873	-0.848497	1.12174	-1.57164	0.0950516	-0.855606	-0.438509	0.000233081	-2.66507	-2.61158	-1.48773	-1.74402	1761
2024-07-26	0.386036	-0.151369	0.0469023	0.281319	0.600968	-0.130351	0.954808	0.651209	0.484769	0.0579323	0.000369322	0.953371	-0.50094	0.0599626	0.266738	1762
2024-07-29	0.351672	0.0882752	0.808613	0.157264	0.83995	0.391295	0.467374	-0.416681	0.186422	-0.050266	-0.000312208	0.175343	0.766977	0.384557	0.174976	1763
2024-07-30	-0.0869893	-0.299852	0.207787	0.351241	-0.171478	0.0593781	-0.438585	-0.255543	-0.232438	0.512068	-3.96044e-05	-0.0919758	-0.549536	0.958504	-0.87023	1764
2024-07-31	-0.71215	-3.88418	-0.274304	-0.160935	-1.30669	0.0356439	-1.60422	-0.580234	-0.275242	-0.119607	-0.000175927	1.58094	1.35628	0.943515	1.35153	1765
2024-08-01	0.656203	-0.399993	0.690436	0.948914	-1.26629	0.297375	1.2372	0.205167	-0.172897	-0.607921	-0.000721421	1.2105	0.616598	0.120146	0.304749	1766
2024-08-02	0.014199	-3.66838	-2.49562	-0.356178	-3.39244	-0.154688	-4.24869	-1.41577	-1.19428	-0.84825	-0.000448858	0.625168	0.118661	-0.130642	-1.17012	1767
2024-08-05	-0.441682	-3.68451	-0.847349	0.464073	-1.89374	0.942672	-1.53289	-2.94268	-3.60681	-1.85948	0.00200544	-3.46497	-3.77934	-3.6252	-2.43869	1768
2024-08-06	-0.493312	1.38385	0.622405	0.982469	0.1458	-0.752167	1.32889	0.789823	0.282821	0.439354	-3.96044e-05	0.0698903	-0.103878	-0.406153	0.138807	1769
2024-08-07	-1.0551	2.74814	0.0267781	-0.316452	2.97107	-0.796069	0.990149	-0.425024	-0.899481	2.23099	-0.000448367	0.124336	0.15947	1.05803	2.55492	1770
2024-08-08	0.218393	-0.431395	0.225741	-0.315871	0.119404	-0.697762	-0.0739358	2.45642	2.28028	0.347379	9.66635e-05	0.445927	-0.484088	-0.269336	-0.0959186	1771
2024-08-09	-0.291796	-0.731825	-0.211953	-0.343136	-0.397814	0.0825456	-0.448755	-0.358394	-0.571724	-0.833763	0.000232891	0.66424	1.33179	0.192925	0.622861	1772
2024-08-12	0.269457	1.2286	-0.0527535	-0.133924	0.857644	-0.436339	0.417284	-0.605446	0.74671	-0.310306	-0.000312099	0.99859	0.782285	0.84614	0.34927	1773
2024-08-13	-0.308837	-0.705717	-0.509365	-0.71663	-0.446215	-0.435182	-0.950831	0.411321	-0.15441	0.162025	-3.96044e-05	0.864954	-0.57348	0.0597541	0.302422	1774
2024-08-14	-0.462674	-0.15735	-1.37697	-0.285459	-0.373249	-0.10579	-0.902408	-0.753816	-0.282627	-0.216143	-0.000175872	-0.711029	0.493515	-0.135321	0.517091	1775
2024-08-15	0.0825833	2.40894	0.757038	-0.188298	1.83801	-0.293271	1.77819	-0.499097	-0.631823	-0.214099	-3.96044e-05	-0.500646	0.194565	0.124825	-0.836175	1776
2024-08-16	0.0655101	-0.948273	-0.190764	-0.58787	-0.640244	-0.479736	-0.464041	0.462541	0.116178	0.0426638	0.000369159	1.67976	0.153193	0.961559	0.564576	1777
2024-08-19	-0.787955	-2.06521	-1.45021	-1.0656	-1.35699	-1.54588	-1.28262	0.172757	0.253847	0.763161	-0.000312099	0.330412	1.37367	-0.390134	-0.61987	1778
2024-08-20	-0.481966	-0.891658	-0.69845	-0.582352	-1.29143	-0.658118	-0.37965	-0.224864	-0.4458	-0.124052	-0.000175872	1.47643	1.8123	0.762111	0.565185	1779
2024-08-21	-0.826614	-0.641721	-0.715664	-0.675571	-1.4996	-0.242029	0.114038	0.746211	0.339338	0.105292	9.66635e-05	-1.43407	-0.423735	0.626926	1.15507	1780
2024-08-22	0.375331	0.915215	0.573019	-0.225648	0.0959815	1.02649	0.480171	-0.337855	-0.0813236	-0.0814738	-0.000175872	-0.708452	-0.00990235	-0.701	-0.862115	1781
2024-08-23	-1.57021	-1.36656	-1.20165	-1.38725	-0.630241	-1.60122	-1.00582	1.2655	0.83739	0.259849	0.000777799	1.17963	-0.271162	-0.709027	-0.309621	1782
2024-08-27	-1.042	-0.754841	0.318134	-0.505757	-1.31267	-0.0577052	-0.00814309	-1.70801	-1.99218	-1.00757	-0.000584486	-0.16842	0.875342	0.698532	1.02772	1783
2024-08-28	0.136173	0.22965	0.650238	0.462365	-0.459183	-0.0576917	-0.00304596	-0.213543	0.43608	0.0161925	-0.000175859	-0.196861	-0.91446	-1.03163	-0.261447	1784
2024-08-29	-0.0373741	0.593099	0.808864	0.207283	1.18151	-0.606217	-1.40232	0.0839641	-0.0262132	-0.197344	9.66499e-05	0.505323	0.0870239	-0.134768	-0.134101	1785
2024-08-30	0.569276	1.14537	0.516998	0.734523	0.699212	0.949339	-0.376733	-0.145548	-0.0544601	0.0777232	-3.96044e-05	-0.259275	-0.0582933	-0.0701113	0.969839	1786
2024-09-03	0.861255	-0.182358	0.341073	0.398127	0.271609	1.00153	1.57108	-0.675725	-0.724013	-0.243362	-0.000312127	-1.52015	-2.30226	-1.85001	-1.02389	1787
2024-09-04	-0.416956	-1.85412	-0.739385	-0.522941	-0.505787	-0.0811858	-0.467404	0.139797	0.151397	-0.00441474	0.000232918	0.305016	-0.495391	-0.139176	-0.786223	1788
2024-09-05	-0.0717899	-1.10017	-0.286986	-0.30552	-0.708595	-0.0811549	-1.02057	-0.747667	-0.596145	-0.367987	-0.000312127	0.890476	1.26713	1.25535	0.299805	1789
2024-09-06	0.790966	-1.62504	0.202769	0.397141	-0.60998	1.12351	-0.238633	-0.945143	-1.07955	-0.609443	9.66635e-05	-0.201159	0.2185	0.322205	0.426772	1790
2024-09-09	-0.0198951	0.94771	0.870851	0.72372	1.33118	0.31405	1.30625	1.18476	0.946098	0.432852	9.66499e-05	-0.334473	-1.44274	0.64443	-0.524894	1791
2024-09-10	0.805503	-0.814129	0.341618	0.24991	-0.507217	0.268034	0.35924	0.176664	0.165686	0.00375195	-0.000584703	0.23468	0.596157	0.252699	0.813729	1792
2024-09-11	-0.208747	-0.718508	0.263208	0.522882	1.17617	0.0348222	-0.0744486	-0.1649	-0.369659	-0.176469	0.000232972	0.00997332	0.748294	-0.457372	0.964829	1793
2024-09-12	-0.00267079	0.617436	-0.564468	-0.729923	0.571239	-1.08247	-0.105073	0.256136	0.121194	0.642757	-0.000175886	1.59714	-0.128622	1.59432	1.86903	1794
2024-09-13	-0.243324	-1.98776	-0.857141	-0.794532	-1.18153	-0.382535	-1.25011	0.840682	0.514001	0.212877	0.000777881	1.18959	2.31393	1.86047	1.17246	1795
2024-09-16	0.306694	0.136411	-0.736563	-0.831337	-0.633241	-0.635363	0.135181	-0.911259	-1.05504	0.267695	-0.00085709	0.32347	1.75321	-0.435506	0.264521	1796
2024-09-17	-0.019847	1.1925	0.104572	0.517502	0.448911	-0.35718	-0.00814309	0.736118	0.300409	-0.0645745	9.66772e-05	-0.453114	-0.445985	-0.438562	0.680879	1797
2024-09-18	0.15187	0.17227	0.0459774	-0.466648	-0.255874	-0.172757	-0.756099	0.477362	0.183086	0.00131285	-0.000175886	-0.242009	-0.187292	-0.379126	0.333407	1798
2024-09-19	-0.810845	1.14587	-0.598112	-1.06867	0.498864	-1.29294	-0.711396	0.370836	0.606977	0.00351187	9.66772e-05	0.169597	1.03452	0.678454	-0.231217	1799
2024-09-20	0.0834382	1.22357	-0.22685	-0.342393	0.472724	0.238925	-0.88269	0.0422609	0.616124	-0.0667771	-3.96044e-05	1.23205	0.263744	0.0565287	-0.843759	1800
2024-09-23	-1.08997	-0.404627	0.572206	-0.608136	-0.506221	-0.967325	0.00730836	-0.0044133	0.519679	-0.0350416	-3.96044e-05	0.951775	-1.28233	-1.56874	-0.861223	1801
2024-09-24	-0.556895	0.194195	-0.383134	-0.327234	-0.381583	-0.577818	-0.988035	0.272065	-0.00210556	0.11415	0.000505386	0.195597	0.435306	0.812768	0.579785	1802
2024-09-25	-0.0720413	0.754291	0.143324	0.510829	0.925568	0.803729	-0.0236363	-0.434305	-0.49499	-0.204729	-0.0011298	0.997789	1.74658	0.863596	-0.433985	1803
2024-09-26	-0.00267079	0.30224	-0.790981	-1.18991	-0.782973	-1.4814	-1.08913	0.649373	0.299738	0.132531	0.000641872	0.0411329	1.10772	0.912126	0.111735	1804
2024-09-27	0.655519	-2.56926	0.493054	0.455787	-0.96295	-0.21426	0.0177555	0.15363	0.360385	-0.0687989	-0.000175872	-0.131054	-1.02148	0.478435	-0.833698	1805
2024-09-30	0.118373	0.772939	0.27962	-0.0610966	0.526076	-0.52788	0.328371	-0.889704	-0.608834	0.481096	-0.00044849	-1.36928	-1.54241	-1.71519	-1.34163	1806
2024-10-01	-0.331363	0.476142	1.53267	1.56387	0.373825	1.02184	-0.0133179	-0.94697	-1.05328	-0.349266	-0.000175927	1.49646	0.492585	0.303635	0.199697	1807
2024-10-02	-0.123885	2.87215	0.340861	0.152477	0.950752	-0.169629	-0.00814309	-0.119779	-0.618211	-1.38374	9.6718e-05	-0.323585	0.0441372	1.09396	0.684724	1808
2024-10-03	0.82725	0.897726	0.696094	2.12021	1.14635	1.16382	-0.00814309	-0.0116652	-0.145794	-0.461614	9.67044e-05	-0.600148	0.180168	-1.41334	-1.43959	1809
2024-10-04	0.772711	2.1971	1.07454	0.10012	1.23966	1.03564	-0.00814309	0.431098	0.422852	0.278861	9.66908e-05	0.0457435	0.986537	0.426751	0.94243	1810
2024-10-07	0.512824	-0.688591	-0.290201	0.371702	-0.823951	0.812872	-0.00814309	0.00856125	0.0248732	-0.150714	-0.000448531	-0.42866	-0.341018	-0.747702	0.116498	1811
2024-10-08	0.922363	0.0808385	0.125683	-0.171309	0.54319	0.517348	2.1588	-0.0819761	0.0925064	0.0219042	-0.000585031	-0.0965731	-1.10435	-0.946205	0.15662	1812
2024-10-09	0.339007	1.13163	0.383489	0.181775	0.492351	0.288049	1.13717	-0.603754	-0.526041	-0.196917	-0.000448817	-1.26734	-1.11606	-1.0252	0.196267	1813
2024-10-10	1.18928	-0.780878	0.523294	0.372459	-0.524987	-0.196519	-0.131232	-0.165235	0.074846	0.122938	9.68135e-05	0.707276	-0.0474757	0.379234	1.419	1814
2024-10-11	0.268923	0.63499	-0.330891	-0.226072	0.0457915	-0.541498	-0.660183	0.7402	0.324009	0.175623	0.000642281	0.767974	0.949497	1.38414	0.650355	1815
2024-10-15	0.590342	0.0919014	0.86231	-0.171444	1.18543	1.07232	2.67975	1.52135	1.10452	0.0480307	0.000233054	-0.0428608	-0.0836534	0.119505	-2.49066	1816
2024-10-16	-0.527834	0.549967	0.525761	1.13628	0.539196	1.07994	-0.00814309	0.128088	-0.0119036	0.130261	-3.96044e-05	1.02118	1.13226	0.799487	0.237708	1817
2024-10-17	0.319344	0.454511	0.727377	-0.104098	0.316524	-0.941573	0.114258	-0.116	-0.0684979	-0.130419	-0.000312263	0.500372	0.00737032	0.423714	0.953336	1818
2024-10-18	0.217399	-0.65878	-0.333632	-0.185934	0.143983	0.0344738	-1.03453	0.278568	0.198389	0.0326959	0.000233054	0.902784	0.543041	0.662799	0.931459	1819
2024-10-21	0.72378	1.01612	0.688481	0.579351	-0.0036556	0.894776	0.880536	-0.394722	0.124693	-0.0671855	-0.000448613	0.906453	3.21918	0.655563	0.302092	1820
2024-10-22	-0.289602	0.719628	0.308275	0.155904	-0.0774889	-0.430993	0.200942	-0.0318353	-0.317153	-0.301693	-0.000312345	-0.0511688	0.689698	-0.304729	0.185561	1821
2024-10-23	0.1324	1.93909	0.530281	0.348144	0.291533	1.08486	0.103999	-0.303524	-0.655856	-0.228869	-0.000585249	-0.0551579	0.121241	0.413616	-0.350205	1822
2024-10-24	0.334664	-1.10962	-0.536598	-0.269149	0.0946827	0.0583894	-0.32427	0.453469	0.031914	0.127534	0.00050604	-0.230827	-0.643367	0.70618	2.49338	1823
2024-10-25	0.401489	0.216857	-0.13379	-0.186582	-0.0773753	0.175659	0.0377633	-0.543048	-0.670512	-0.791527	-0.00195032	-0.0751418	-1.69132	-0.955673	1.45189	1824
2024-10-28	0.350396	1.27439	-0.11362	-0.0358434	-0.102019	0.787694	0.27227	1.0098	0.812107	0.416588	0.00187111	0.359692	0.383755	0.827181	0.892577	1825
2024-10-29	0.0981076	0.271968	0.428984	-0.323037	0.635065	0.697061	0.231311	0.814989	0.425829	0.200039	9.67726e-05	1.03036	1.26561	0.990522	0.672194	1826
2024-10-30	0.0309123	-0.392452	-1.31692	-0.0903982	-0.470207	-0.650071	-0.375031	-0.167572	0.093641	-0.164715	0.000369445	0.287295	-0.212177	-1.77361	-2.28592	1827
2024-10-31	0.466987	-0.945726	0.18694	2.14874	-0.372794	0.792199	-0.268247	-0.694435	-0.935867	-0.375711	-0.00154005	-1.78214	-0.762591	-1.51908	-1.12197	1828
2024-11-01	-0.237381	0.653036	0.147033	-1.41293	1.39586	-0.768773	0.175479	-0.296701	-0.0806074	0.0627375	0.00105179	0.35133	-1.3784	0.544069	0.0309368	1829
2024-11-04	-0.455994	-1.08558	-0.71286	0.23852	-1.74844	-0.0590626	-1.12661	-0.587195	-0.804191	-0.276594	-3.96044e-05	-0.120807	0.0500261	-0.432066	-1.5668	1830
2024-11-05	-0.810758	-0.0951793	-0.710484	-0.994371	0.0949646	-1.16342	0.257742	0.443837	0.130934	0.248601	0.000642076	-0.0551535	-0.350846	0.239014	0.296437	1831
2024-11-06	1.32582	2.97662	3.77959	1.62384	3.10673	1.39935	3.72936	1.85652	1.91975	0.67153	0.00105038	-3.38117	-1.52563	-1.73598	-2.08845	1832
2024-11-07	-1.06149	-1.68116	-1.20429	-1.20326	-0.880569	-2.3103	-1.8848	0.0325721	0.99572	0.298734	-0.000175804	1.24402	-1.28122	0.928032	-0.243645	1833
2024-11-08	0.921963	-0.657827	1.66388	1.10353	0.776529	2.28654	1.88369	0.13898	0.351948	-0.0689599	-0.000175818	-0.0876368	0.791469	-0.0670241	-0.768746	1834
2024-11-12	0.583833	2.43182	2.29071	2.3898	1.76557	1.19783	2.68825	3.04342	1.48693	3.15523	0.000368995	-3.52736	-2.13014	-1.88824	-1.91423	1835
2024-11-13	0.482176	0.597375	0.643286	0.340522	0.57526	0.847745	-0.384938	0.56821	-0.321683	-0.283723	0.000368873	-0.39288	0.920941	-0.58167	-0.907297	1836
2024-11-14	0.664436	0.741637	0.109713	0.0471885	0.693822	0.299714	0.127548	-0.833076	-0.724105	1.47031	-0.00167425	-1.3823	-1.74471	-0.912872	-1.01644	1837
2024-11-15	0.845136	-1.57553	0.212677	1.0855	0.020946	0.276301	0.0722427	0.885433	0.137488	1.87973	0.00036924	0.13801	1.24194	0.64443	1.22183	1838
2024-11-18	-0.800522	0.189896	-0.691976	-0.48661	-0.65193	-0.898722	0.373446	-0.189393	0.595426	2.93346	0.000369118	1.42452	0.129222	0.956478	1.68657	1839
2024-11-19	-0.78655	-0.525853	0.171132	-0.0368618	-0.605776	-0.63205	0.132341	0.378131	-0.571606	-0.202217	0.000777472	0.629357	0.98382	0.690505	1.57975	1840
2024-11-20	0.2311	1.15371	1.1807	0.398505	0.767981	0.703923	0.327796	0.441863	-0.229512	0.0236081	-0.000720468	0.666465	-0.781993	-0.00524772	0.113895	1841
2024-11-21	-0.587538	-0.841614	0.958819	0.752032	0.285394	-0.226966	-0.464494	0.889222	1.46359	1.60878	0.000232782	0.965254	0.339962	-0.637421	-0.20483	1842
2024-11-22	0.415241	0.0536343	1.58884	0.996406	1.93439	0.179295	0.428161	0.0748146	-0.176485	2.13259	-0.000175791	1.1545	0.328579	0.248408	-0.286174	1843
2024-11-25	0.297763	-0.526015	-1.63726	-0.533518	-1.70038	0.0837963	-0.308986	-1.40912	0.387	-0.549074	-0.00112958	-2.49236	-0.875371	-0.769402	-1.27188	1844
2024-11-26	0.912935	-0.938912	-0.0552977	0.104354	0.068949	0.707571	0.618332	-0.311467	-0.459955	-0.141528	-0.000448572	-0.605464	-0.485031	-1.23508	-0.1302	1845
2024-11-27	-0.501647	-3.25949	-1.93281	-1.84064	-1.66563	-0.755253	-0.31874	0.87504	1.54089	0.62128	0.00159553	0.724651	-0.11311	-0.136158	-0.297873	1846
2024-11-29	-0.235892	-0.352506	0.58287	-0.288896	0.407628	-0.513441	-0.183597	0.306527	-0.317994	2.63001	-0.000720672	0.367652	0.372332	0.581649	0.11998	1847
2024-12-02	0.912217	-1.3739	1.30845	0.846896	1.08071	1.28114	1.44806	-0.416419	0.205089	5.48877	-3.96044e-05	-0.420255	-0.477027	0.124411	0.16123	1848
2024-12-03	-0.0690874	-0.190664	-0.696502	-0.528283	-0.315682	-0.587883	0.710299	-0.0382259	-0.163959	-1.09694	0.000505277	-0.115154	0.817891	0.83088	0.243359	1849
2024-12-04	0.0637458	1.21825	-0.178919	-0.48475	-0.388533	1.11814	-1.13633	0.575359	0.962394	-0.853613	0.000777309	0.27705	-0.149025	-0.841375	-0.63069	1850
2024-12-05	-0.567815	-0.0141484	-0.899241	-0.580969	-0.969871	-0.0842541	-0.378314	-0.428804	-0.257721	-0.697102	-0.000720332	-0.404048	0.917039	-0.00524772	-0.131731	1851
2024-12-06	1.8043	-0.505973	0.171365	0.14463	-0.415507	1.36905	0.701852	0.580308	0.890593	0.997707	0.000641123	-0.171066	-0.449221	-0.395052	-0.343934	1852
2024-12-09	-0.399338	1.67794	-0.137025	-0.537797	-0.027604	-1.94657	-0.487988	-0.592006	-1.25147	-1.20775	-0.00126516	1.36967	0.926881	0.964633	0.66844	1853
2024-12-10	0.658067	0.912325	1.20225	0.353138	1.20725	2.04453	-0.528692	-0.224332	-0.443499	0.854326	9.66227e-05	0.667597	0.465743	-0.779915	-0.594692	1854
2024-12-11	-0.564179	0.30883	0.0895754	-0.0644026	0.18988	-0.036231	0.517407	0.967666	0.877065	0.0972438	-3.96044e-05	0.588249	-0.378645	-0.0702495	-0.00555417	1855
2024-12-12	0.872034	-0.337415	-0.117117	0.674863	1.19974	-0.255189	0.391766	-0.297091	0.185455	-0.345575	-0.000720876	-0.907865	0.30372	-0.20067	0.247969	1856
2024-12-13	1.00003	1.89248	0.337746	1.21133	1.21711	0.694774	0.346408	0.262333	0.0870323	0.422213	-3.96044e-05	-1.0869	-2.10789	-0.529455	-0.428966	1857
2024-12-16	-0.166753	0.476115	-0.282629	-0.8511	0.140194	-0.329052	0.390937	0.942399	0.295888	0.336528	-3.96044e-05	-0.252453	-0.168364	0.844316	-0.433377	1858
2024-12-17	1.33941	-0.905214	0.130928	-0.386461	-0.0744472	0.794521	0.0417111	-0.0332715	-0.433135	0.396349	-0.0001759	-0.78978	-0.665759	-0.526654	-0.918755	1859
2024-12-18	0.372386	0.648354	0.773339	0.312919	0.187856	0.897274	0.0815771	-1.33096	-1.21385	-1.44712	-0.000721285	-0.0821518	0.065144	-0.136299	-0.226009	1860
2024-12-19	0.501889	4.17759	2.34356	2.3442	1.37523	1.22522	0.494876	-0.664853	-1.02733	-0.419969	-0.000448776	-1.85723	-1.67016	-0.0708789	-0.8994	1861
2024-12-20	-0.197855	-1.83912	-1.51896	-0.801382	-1.54796	-0.359262	-0.0678713	0.0247492	0.235494	0.206452	0.000505931	0.952773	-1.38123	0.0603835	0.533084	1862
2024-12-23	0.582394	1.0174	0.444742	0.826032	1.51878	0.559233	0.111304	-0.729776	-0.285513	-0.127709	-0.00113089	-0.163781	1.56433	0.517275	0.128009	1863
2024-12-27	0.694241	0.744189	-0.285103	-0.617789	0.659666	0.861254	0.00678497	-0.185777	-0.46846	-0.731402	-0.000312563	0.0365919	0.0575307	-0.856635	-0.228401	1864
2024-12-30	-0.95943	-0.549992	0.779453	0.713382	1.15174	-0.286821	0.0565381	-0.405955	0.106373	-0.582774	-0.000312618	-0.339385	-0.376974	-0.801832	-0.454909	1865
2025-01-02	0.776007	0.409199	2.6374	2.10369	1.37936	0.263063	-0.00316809	0.929474	0.425467	2.0296	0.00105212	1.49226	-0.12625	0.526962	0.533084	1866
2025-01-03	0.531168	-0.52791	-0.648448	-0.611168	-0.63376	-0.0368939	1.0103	0.224858	0.696123	0.259003	0.000505931	-0.0325399	0.771022	1.30531	0.437977	1867
2025-01-06	-1.55906	0.353629	-2.19824	-1.57613	-1.22386	-1.05888	0.110902	0.855291	0.329938	-0.22012	0.00105081	-0.609297	0.845166	-0.135044	0.0385367	1868
2025-01-07	-0.295651	0.286049	0.592744	0.44546	0.796865	0.137261	0.195136	-1.238	-1.49032	-0.872669	-0.000857335	0.669877	-0.0856132	0.897579	-0.182202	1869
2025-01-08	0.550429	0.518639	1.18335	1.90642	0.747274	0.68601	0.24951	-0.481827	-0.299705	0.560635	-3.96044e-05	0.308621	-0.199235	0.186489	-0.0941639	1870
2025-01-09	0.305845	-0.358999	0.323102	0.912946	0.418206	0.513603	0.0166216	-0.64923	-0.59093	-0.603053	0.000233027	0.558724	0.254457	-0.133005	-0.227919	1871
2025-01-10	0.694048	-0.393046	1.27635	1.28096	1.13864	1.22121	0.01662	0.468371	0.220105	0.363984	-0.000312236	0.470046	0.112256	0.504185	1.35409	1872
2025-01-13	-0.423694	-0.215308	0.623134	0.836471	0.484926	-0.213869	-0.0428118	-0.0944769	-0.709756	0.967528	-31.3845	-0.784725	-0.920047	-0.00524772	-0.877574	1873
2025-01-14	-0.684392	0.464118	-1.75219	-0.432745	-1.21082	-0.741898	-0.0477686	0.41652	0.422072	0.712635	31.3842	-0.155442	-0.297298	-0.899566	0.43277	1874
2025-01-15	-0.474547	-1.53349	0.218078	-0.373477	-0.212263	-0.863416	-0.0428189	0.842922	1.10614	2.1483	0.000505658	0.383919	0.467982	-0.198605	0.81459	1875
2025-01-16	0.599211	-1.33172	-0.436357	-0.459766	-0.422856	-0.0867909	0.0512992	-0.160149	-0.746033	0.386702	-0.000312208	1.51725	1.32567	-0.134494	-0.348884	1876
2025-01-17	0.69487	0.943237	0.344527	0.951041	0.907627	0.262975	-0.340154	0.838813	0.787224	0.169432	0.000505549	-0.105416	-0.159188	-0.134768	-0.0486729	1877
2025-01-21	-1.49763	-0.938435	-2.8464	-2.16985	-1.82657	-1.55474	-2.68021	0.387988	-0.745183	-0.512919	-0.000312154	0.851689	-0.290481	0.382492	-0.352144	1878
2025-01-22	0.534666	1.24598	0.0694316	0.106147	0.0444328	-0.110894	0.0717563	-0.57423	-0.469932	-0.00939915	-0.00085758	0.503626	0.558099	0.0591367	1.40565	1879
2025-01-23	-0.0352015	-0.722515	0.00689386	-0.326127	0.0679118	-0.283845	0.750025	-0.00162228	0.455008	-0.2768	0.000778371	-0.353079	-0.615949	0.251612	0.867879	1880
2025-01-24	-0.458577	-0.499357	-1.96478	-2.12657	-0.637519	-0.87407	-2.2072	0.152069	-0.170482	-0.104272	-0.000312208	1.23401	0.660201	-0.133543	0.158728	1881
2025-01-27	0.924488	-1.56794	0.482607	0.24717	-0.875953	1.02333	0.327573	-0.645622	-0.712334	-0.232006	9.67044e-05	-1.41395	-0.502941	-0.0694965	-1.33859	1882
2025-01-28	0.062255	1.59527	1.35696	0.661542	1.08265	0.806365	-0.434105	-0.212572	-0.577244	-0.00649168	-0.000721285	0.324334	-0.82809	-0.651485	-0.473964	1883
2025-01-29	0.645597	-0.511738	0.236199	-0.0233527	0.631973	0.461194	-0.00814309	0.464183	0.159032	0.00994107	0.000642076	0.121236	0.526984	0.576673	-0.134235	1884
2025-01-30	-0.342787	-0.933427	-0.0765178	-0.251831	0.208602	-0.136512	-0.00814309	0.164054	0.673227	0.227004	9.66908e-05	1.16577	1.01205	1.07902	1.22179	1885
2025-01-31	0.774011	0.530608	0.424273	0.0908796	0.0912745	-0.235966	-0.00814309	-0.544606	0.230767	-0.427158	-0.000584867	0.913829	1.09318	0.623667	0.368006	1886
2025-02-03	2.28001	-0.286815	2.59156	0.835286	1.21299	1.61384	-0.00814309	-0.287539	-2.2964	-1.57694	0.00159553	0.490892	-0.591462	-0.697412	0.446453	1887
2025-02-04	-4.57424	-0.162157	-2.13866	-1.39502	-1.87543	-2.01036	-0.00814309	-0.841689	-0.9294	-0.904081	-0.000993194	0.618796	0.534276	0.37327	-0.251487	1888
2025-02-05	-0.623392	-2.57844	-0.828748	-0.407021	-1.13449	-0.976893	1.48304	-0.324369	0.294418	-0.836292	-0.000312181	1.00128	1.19621	0.558161	-0.211629	1889
2025-02-06	0.552789	-0.360538	1.0729	1.1591	1.10582	0.408031	0.804921	-0.0564079	-0.628845	-0.324102	0.000232972	-1.28434	-0.472445	0.983697	-0.462591	1890
2025-02-07	-0.0516288	-0.882794	0.82562	0.563484	1.10033	0.359575	0.290686	-0.0630429	-0.445954	0.36612	-3.96044e-05	1.311	0.433328	-0.127993	-0.594692	1891
2025-02-10	0.095235	0.461047	0.364742	0.163006	0.231491	-0.383333	0.499303	0.160891	0.209476	0.116207	-3.96044e-05	1.07264	-0.0372517	-0.189829	0.750368	1892
2025-02-11	-0.149545	0.725027	-0.708215	-0.539208	0.558062	-0.382447	0.126062	-0.433046	-0.401373	-0.0837201	-0.000312181	-0.393834	-0.974204	-0.19039	-0.172339	1893
2025-02-12	-0.329389	2.54881	-0.956875	-0.294928	-0.0490358	0.210356	0.0713627	0.434103	0.801065	0.298621	9.66908e-05	-0.2003	0.0433848	0.241483	-0.341169	1894
2025-02-13	-0.952745	-1.66927	-0.744389	-1.19037	-1.90085	-0.184756	-1.00322	-0.340915	-0.408202	0.424363	0.000232945	0.841675	0.889835	0.30177	0.455212	1895
2025-02-14	-0.98959	-1.09545	-1.44654	-1.1401	-1.51484	-1.65689	-1.79617	0.154571	0.278827	0.870107	-0.000312154	0.169405	1.43015	0.117128	0.243611	1896
2025-02-18	0.310305	-0.557315	0.857009	-0.0652253	0.967357	0.134727	1.27134	-0.480049	-0.369076	-0.911512	-0.000448531	0.165223	-1.14294	-0.991196	-0.547336	1897
2025-02-19	0.753328	-0.164753	1.06902	0.612089	0.751533	0.281749	0.226273	0.182516	0.245937	0.854088	0.000369322	0.309845	0.766518	-0.441662	0.16191	1898
2025-02-20	-0.659922	-2.40427	-1.42886	-1.00973	-1.41906	-1.28028	-1.39689	0.329568	0.101618	-0.272136	9.66772e-05	-0.231724	0.24008	0.0572886	0.0779227	1899
2025-02-21	0.0137831	-0.190256	0.422079	-0.0509843	-0.0501255	0.401651	-0.278517	-0.543007	-0.502499	-0.617971	-0.000993862	0.0249931	-0.244511	-0.00524772	-0.298469	1900
2025-02-24	0.457567	0.0681257	-0.470501	0.103625	-0.548481	0.353917	-0.133385	-1.15162	-1.014	-1.65436	0.00132342	-0.136905	-0.752444	-0.444354	-1.02599	1901
2025-02-25	1.24199	-0.590413	-0.407381	-0.163406	-0.883772	0.69778	0.172191	-0.746852	-0.132381	0.238308	-0.00112991	-0.00291093	-0.664202	-0.00524772	-0.74402	1902
2025-02-26	0.747469	0.0212736	-0.323958	-0.611743	0.092511	0.209021	0.407286	-1.20099	-1.1292	-0.75344	-0.000312318	-1.26001	-0.78846	0.120534	-0.357716	1903
2025-02-27	1.18285	0.76149	2.08303	0.959646	1.21017	1.64255	1.28016	0.0818033	-0.251016	-0.0252048	0.000642076	-0.815931	-0.0015594	-0.891216	-0.316192	1904
2025-02-28	0.224003	0.956301	0.257369	0.526707	0.920336	1.10928	-0.132779	-0.137978	-0.558856	-0.352472	0.000641735	-1.81994	-1.09136	-0.904273	-0.184122	1905
2025-03-03	-0.553545	-0.586396	-1.94748	-1.6805	-1.09201	-0.959167	0.0666438	0.426317	-0.700054	1.38182	-0.00112991	1.70982	0.69117	1.14823	0.9671	1906
2025-03-04	1.87146	-1.61206	-0.778208	-0.204364	-1.69537	0.910406	-0.96658	0.220523	0.131572	0.349537	0.00064194	0.897621	0.664539	-0.00524772	0.255766	1907
2025-03-05	-2.26644	-0.0140407	-4.76613	-1.91154	0.020946	-2.49205	-0.733643	0.786061	0.509375	0.216892	-3.96044e-05	0.222596	0.603361	0.184895	-0.223205	1908
2025-03-06	-1.51868	-1.11501	-0.999527	-0.408736	-1.39586	-0.895132	-0.198514	-0.217981	-0.328877	0.490824	-0.000175886	0.281687	0.289371	0.498922	0.255489	1909
2025-03-07	1.67577	-0.942651	-0.814906	-0.325249	-1.59949	1.16691	-0.650128	-0.907076	-0.505201	-1.17127	-0.000448531	0.280663	0.094762	-0.382984	-0.222975	1910
2025-03-10	0.743044	-0.00196943	0.447473	0.129092	0.965681	-0.208966	1.24968	-2.19442	-2.35233	-2.269	0.000233027	-0.836187	-0.00199139	0.057871	0.557362	1911
2025-03-11	0.498537	0.367607	-1.78985	-0.530867	-0.2935	0.555423	-1.57734	1.14635	0.479567	0.953875	-3.96044e-05	0.197866	0.0594282	0.995869	-0.177939	1912
2025-03-12	-1.05483	0.971708	0.0466606	-0.29647	0.673508	-0.529933	0.463829	0.14807	-0.155799	0.388899	-0.000175913	0.242087	0.81624	0.118745	0.123802	1913
2025-03-13	0.0135522	-0.749691	1.3233	0.348117	0.551189	0.407364	0.327889	-0.742341	-0.419488	0.0492845	-0.000448613	1.76969	0.187493	-0.191331	-0.394852	1914
2025-03-14	-0.343591	0.922858	-0.253029	0.39005	0.165329	-0.726379	-0.319087	0.724693	0.38377	0.565391	0.000778289	0.0935576	1.24935	0.6743	1.10917	1915
2025-03-17	-1.28965	0.0332808	-0.989922	-0.968936	-1.01597	-1.40673	-0.259099	-0.0391912	0.09586	-0.124487	-0.000312181	0.621046	-0.230505	0.362249	0.121142	1916
2025-03-18	0.22592	1.07025	-0.0925366	0.0189166	-0.923896	0.451682	-0.27937	-0.396995	0.0215949	-0.332889	0.000232972	1.00905	0.510539	0.116761	-0.344283	1917
2025-03-19	0.258302	0.595766	1.00325	0.25172	0.675514	0.600185	0.127496	1.03083	1.00946	1.39473	0.000232918	0.00995339	-0.296615	-0.494753	-0.133301	1918
2025-03-20	-0.0352764	-1.41282	0.586882	-0.0495714	0.649375	0.725796	0.879792	-0.7348	-0.638845	-0.60259	-0.00113002	0.328366	-1.05566	-0.251481	-0.693664	1919
2025-03-21	0.485937	0.139287	0.849632	1.0632	0.213936	0.853194	0.0369482	-0.0859262	-0.185457	-0.335598	9.67453e-05	-0.935218	-0.242819	-0.81244	0.425864	1920
2025-03-24	-1.04627	2.03695	0.248278	-0.228886	0.213762	-0.383215	0.217229	0.835339	0.905176	0.358007	0.000778208	-0.268897	-0.183265	-0.193049	-0.091476	1921
2025-03-25	0.242342	-1.15972	-0.194278	-0.475808	-0.53387	-0.702672	0.182063	-0.0721725	-0.134176	-0.0331084	-0.000175872	0.578331	0.58126	0.68055	0.422269	1922
2025-03-26	-0.869535	1.04977	0.469868	0.816884	0.503477	0.0373616	0.521905	-0.175809	-0.498244	-0.582648	9.66635e-05	-0.485225	0.53274	-0.503244	-0.0481365	1923
2025-03-27	1.01108	0.300213	-0.375634	-1.01218	-0.48574	-0.0365013	-0.158078	0.0304314	-0.0822157	-0.0758213	-0.00072108	1.50432	0.569309	-0.00524772	0.544601	1924
2025-03-28	-0.558053	-0.853811	-0.515476	0.293367	-0.196575	0.185208	-0.0931338	-0.780362	-0.952301	-0.812069	-3.96044e-05	0.483016	0.455502	0.678454	0.0784348	1925
2025-03-31	1.57832	-0.447154	0.60974	0.638021	0.841528	1.57389	-0.313273	-0.546117	-0.706503	-0.753325	9.6718e-05	1.48195	-0.586755	0.364476	0.287062	1926
2025-04-01	-1.02828	-0.612679	-0.0735824	-0.366459	-0.364816	-1.05436	0.641826	0.643162	0.714127	0.280377	9.67044e-05	0.596697	-0.162243	-0.251481	0.284992	1927
2025-04-02	-0.100583	0.654704	-1.35666	-0.694738	-0.172197	-0.555163	-0.118056	-0.750188	-1.02391	-0.77379	-0.000312236	-0.540195	-0.18788	-0.562934	-0.379492	1928
2025-04-03	-4.08606	-4.70162	-3.64038	-1.88865	-5.58338	-1.2885	0.680762	0.119949	0.161526	0.239791	-0.00031229	-0.110913	-2.4209	-1.1996	-1.66649	1929
2025-04-04	2.17963	-0.158188	0.755135	2.54409	-1.04804	7.73304	-0.0580198	0.137989	-0.0343437	0.393908	9.67453e-05	-2.30277	-2.05071	-1.61325	-1.01752	1930
2025-04-07	0.490476	2.4006	2.02817	2.74834	1.26344	1.61572	1.37588	-1.33371	-2.65777	-1.56559	-0.000175954	-1.48308	-1.89927	-1.05707	-0.36347	1931
2025-04-08	-0.413554	-1.14525	0.00689386	-0.552354	-0.897804	-0.918205	1.51416	-0.865488	-0.91463	-0.758857	-0.000721558	-0.0296298	-0.0383896	0.193355	0.12903	1932
2025-04-09	-0.200152	-2.34682	-2.52661	-0.0226005	-3.66888	0.298266	0.540698	1.7118	2.06359	1.75307	0.000778699	2.10115	-0.274382	-0.203851	-0.728488	1933
2025-04-10	-2.93508	-0.936116	-2.96377	-2.33109	-3.29629	-4.82614	-1.78623	-0.872606	-1.58387	-0.605551	-0.000448695	2.32199	1.37272	0.785315	0.717379	1934
2025-04-11	-1.92783	-0.965324	-2.55952	-1.51273	-3.34876	-1.33554	-1.127	0.98789	0.451628	0.348265	9.67726e-05	2.93913	0.613862	0.451226	0.306771	1935
2025-04-14	-0.0531053	-0.773691	-0.625219	-1.68881	-0.345146	-1.66921	1.00643	0.26024	0.565656	0.641818	0.000505767	-0.945507	1.78655	0.705238	1.0909	1936
2025-04-15	0.86999	0.146076	1.31145	-0.627571	1.84515	-1.13959	0.145785	-0.2986	-0.397215	-0.288764	-3.96044e-05	0.470234	0.0423225	0.633546	0.638535	1937
2025-04-16	-1.04352	-0.689888	-1.75622	-0.317034	-1.72475	-0.767266	-0.490005	0.0518399	-0.156215	-0.0409745	9.67044e-05	3.39426	1.10898	0.311658	0.206917	1938
2025-04-17	-0.440542	-0.309441	0.350728	-0.155682	1.6109	0.158372	-0.321448	0.188583	0.0265172	-0.135791	-0.000448572	-0.621327	-1.1481	-0.385733	-0.775651	1939
2025-04-22	-0.982429	-1.83683	-1.93434	-1.5561	-1.35981	-0.230738	0.62813	2.07057	1.70924	0.878682	0.000778208	4.09081	0.50812	0.248672	-0.614663	1940
2025-04-23	1.61678	2.16728	2.21593	1.60678	3.16023	0.353058	-1.29177	0.0104716	0.334947	0.00655325	-3.96044e-05	-5.6164	0.589965	0.436585	0.169401	1941
2025-04-24	-0.0867404	-0.0258433	-0.241791	-0.703896	0.020946	-0.498271	0.0865427	0.0166468	-0.272921	-0.10872	9.66499e-05	1.6662	0.729034	0.495816	0.255489	1942
2025-04-25	-0.524579	1.33566	-0.33697	-0.288293	0.3812	-0.011879	-0.082893	0.113877	0.122106	-0.172405	0.000232863	-1.2935	-0.122231	-0.506312	-0.179398	1943
2025-04-28	-0.019526	-1.31349	-0.107607	-0.845916	-0.77758	-0.424118	0.380389	0.0242653	0.0913738	0.643389	-0.000448327	0.577872	-0.578934	1.23978	0.513786	1944
2025-04-29	-0.0701037	-0.531211	-0.164744	-0.0212999	-0.314813	0.667687	-1.2649	-0.220685	-0.0399487	-0.358308	9.66499e-05	0.236223	0.351102	-0.19039	-0.394442	1945
2025-04-30	-0.779551	0.393345	0.904723	0.709695	-0.341233	-0.352034	0.0717804	-0.0704576	-0.0784025	-0.312024	-0.000175859	-0.152295	-1.76437	-0.93948	-0.573863	1946
2025-05-01	0.673024	3.44915	1.351	0.953343	2.44099	0.620431	-0.00814309	0.489527	0.380121	0.103325	-3.96044e-05	-2.97804	-0.197009	-0.382984	0.649493	1947
2025-05-02	-0.966129	-1.1887	-0.973207	-0.12861	-1.4948	-1.80481	-0.00814309	0.0405341	0.00128398	-0.0498617	9.66499e-05	1.12722	0.405398	0.309695	0.253567	1948
2025-05-06	-0.273831	-2.17796	-0.280531	-1.14168	-0.495325	-1.02036	-2.7254	-0.0661456	-0.266014	-0.361979	-0.000312127	4.6075	1.13302	0.744046	0.294702	1949
2025-05-07	-0.0196288	0.845515	-0.0505456	0.337874	-0.67801	0.635675	0.424367	-0.00220943	-0.0826647	-0.202049	9.66635e-05	-0.0274164	-0.279474	0.180646	0.924067	1950
2025-05-08	2.37633	2.39363	1.91046	0.765991	1.98255	1.09762	0.443933	1.33514	3.27278	1.16847	-0.000448449	-1.34638	-0.797675	-0.00524772	-0.341169	1951
2025-05-09	0.18191	-0.400561	-0.398289	-0.408917	0.200715	-0.229579	0.112316	-0.114812	0.992167	0.0684991	9.66908e-05	-0.960558	0.129892	0.0565913	0.162596	1952
2025-05-12	1.30201	3.49617	3.19146	1.66765	3.30695	1.34769	-1.74863	-0.0892259	1.00926	1.0739	9.66772e-05	-3.02038	-0.895435	-0.252981	-0.724996	1953
2025-05-13	-0.754481	-0.429558	-1.35809	-1.14939	-0.358554	-2.50339	0.188457	0.234263	1.16132	0.161387	-3.96044e-05	-0.304816	1.66705	0.427627	-0.521092	1954
2025-05-14	0.0809833	-1.47017	-0.575482	-0.302294	-0.359231	0.565106	0.107751	-0.179935	-0.478674	-0.195423	-3.96044e-05	-1.27744	-0.184259	-0.0668993	0.381704	1955
2025-05-15	0.431848	-1.14407	0.336715	0.152244	-0.945217	1.07578	-0.0736436	0.00364368	-0.43256	-0.92068	-0.000175886	-0.083947	-1.42568	0.117993	0.54745	1956
2025-05-16	0.0307203	0.468018	0.940867	0.473808	0.96174	0.182283	0.107734	-0.111434	-0.106067	-0.0583443	9.66772e-05	-0.330607	0.0693456	-0.313818	-0.344983	1957
2025-05-19	-0.788626	-1.26917	-1.83772	-1.33029	-1.3535	-1.53437	0.263772	0.397473	-0.0912028	-0.0237609	-0.000175886	1.55372	0.660408	0.36485	-0.176326	1958
2025-05-20	-0.0529281	-0.353224	-0.340854	-0.180942	-0.515965	1.26795	0.243449	0.20719	-0.0618996	-0.163996	9.66772e-05	1.00287	-0.0546832	1.9911	1.50642	1959
2025-05-21	-2.00498	-1.2926	-1.70439	-1.00204	-1.7786	-1.532	-0.889478	0.529904	0.149494	0.191005	9.66635e-05	1.21463	1.12828	2.27282	0.972364	1960
2025-05-22	0.571172	0.230681	1.1976	0.282988	1.05112	1.21755	0.0826073	0.364057	0.689374	0.169971	-0.000448449	-0.572143	-0.773493	1.1308	0.115064	1961
2025-05-23	-1.71146	-1.59527	-1.31784	-1.11635	-1.96659	-1.48123	-1.21496	-0.941555	-0.919674	-0.787803	-0.000175913	1.87919	0.622349	-0.00524772	-1.26936	1962
2025-05-27	0.353654	2.12852	0.466754	0.0841714	1.67422	0.974187	0.759836	0.28497	0.835932	0.0904358	0.000233	-1.56418	-0.356962	0.0510033	-0.254719	1963
2025-05-28	0.725254	0.787389	0.775498	0.571987	-0.0305251	0.47141	-0.0535703	-0.287746	0.0947135	-0.27363	-0.0001759	0.0841674	0.644689	0.163195	-0.550654	1964
2025-05-29	-0.171753	-1.18005	-1.60404	-0.350847	-1.244	-0.639862	-0.442512	-0.505985	-0.339961	-0.204641	-0.000175913	0.328139	0.126058	-0.00524772	0.120882	1965
2025-05-30	-1.05372	0.0838288	0.446798	0.282122	0.0727236	0.205213	0.678527	-0.393742	-0.689778	-0.666041	0.000369281	-1.20775	-0.517904	-0.965964	-0.513651	1966
2025-06-02	-0.81965	-1.76426	-1.61442	-1.0604	-1.43361	-1.42954	-0.0888605	0.344774	0.459885	0.322361	0.000232918	3.01088	0.264515	-1.3296	1.00443	1967
2025-06-03	0.389155	1.40776	1.13099	0.386022	1.81175	0.73138	-0.528191	-0.146571	-0.121597	0.260183	-3.96044e-05	-1.22854	1.68084	0.574094	0.695115	1968
2025-06-04	-0.923651	-1.27499	-0.965124	-0.650792	-1.50938	-0.898585	-0.149644	-0.196921	0.058103	-0.288237	-0.000584703	0.919622	0.146897	1.19375	-0.210396	1969
2025-06-05	-0.0197603	1.15007	-0.297159	-0.178021	0.722631	-0.441426	-0.483586	-0.734685	-1.32007	-0.691584	0.000914176	0.270799	2.33309	3.02767	0.565447	1970
